# Supplementary material for: Regioisomers containing triarylboron-based motifs as multi-functional photoluminescent materials: from dual-mode delayed emission to pH-switchable room-temperature phosphorescence
Source: Royal Society of Chemistry journal article supplement (doi:10.1039/d4sc05656f), 2024-01-01
Supplement: d4sc05656f1.pdf [file d4sc05656f1.pdf]

## Supplementary information

### Regio Isomers Containing Triarylboron-Based Motifs as Multi-Functional Photoluminescent Materials. From Dual-mode Delayed Emission to pH-Switchable Room-Temperature Phosphorescence

Ramar Arumugam<sup>†</sup>,<sup>a</sup> Akkarakkaran Thayyil Muhammed Munthasir<sup>†</sup>,<sup>b</sup> Ramkumar Kannan,<sup>a</sup> Dipanjan Banerjee,<sup>c</sup> Pagidi Sudhakar,<sup>a</sup> Venugopal Rao Soma,<sup>c</sup> Pakkirisamy Thilagar\*<sup>b</sup> and Vadapalli Chandrasekhar\*<sup>a</sup>

#### Table of contents

|          |                                                   |            |
|----------|---------------------------------------------------|------------|
| <b>1</b> | <b>General experimental procedures.....</b>       | <b>S2</b>  |
| <b>2</b> | <b>Synthesis details.....</b>                     | <b>S3</b>  |
| <b>3</b> | <b>Structral charecterisation.....</b>            | <b>S5</b>  |
| <b>4</b> | <b>Single crystal X-ray diffraction data.....</b> | <b>S10</b> |
| <b>5</b> | <b>Photophysical and theoretical data.....</b>    | <b>S16</b> |
| <b>6</b> | <b>References.....</b>                            | <b>S97</b> |

## Supplementary information

### 1. General experimental procedures

#### 1.1. Materials

All reactions were performed under an inert atmosphere of argon using standard Schlenk techniques.<sup>[1]</sup> Starting materials such as *n*-butyl lithium (2.5 M in hexane), dimethylamine (2M in THF), dimesitylboron fluoride, Lithium dimethylamide, 2,6-dibromo naphthalene, 1,4-dibromo naphthalene, paraffin, and ethylene glycol were obtained and used as received. Tetrahydrofuran, *n*-hexane, *n*-pentane, diethyl ether, DMSO, and DCM were dried and distilled by standard procedures.<sup>[2]</sup> Precursors such as 4-bromo-*N,N*-dimethylnaphthalen-1-amine (**P1**)<sup>[3]</sup> and 6-bromo-*N,N*-dimethylnaphthalen-2-amine (**P2**)<sup>[4]</sup> have been synthesized by following modified synthetic procedure as shown in Scheme S1.

#### 1.2. Methods

Multi-nuclear NMR (<sup>1</sup>H, <sup>11</sup>B, and <sup>13</sup>C) spectra were recorded in CDCl<sub>3</sub> at 25 °C on a Bruker Avance 400 MHz/300 MHz NMR spectrometer operating at a frequency of 300 MHz for <sup>1</sup>H, <sup>11</sup>B for 128 MHz, and <sup>13</sup>C for 75 MHz. <sup>1</sup>H NMR spectra were referenced to TMS (0.00 ppm) as an internal standard. Chemical shift multiplicities are reported as singlet (s), doublet (d), triplet (t), and multiplet (m). <sup>13</sup>C resonances were referenced to the CDCl<sub>3</sub> signal at ~77.67 ppm. <sup>11</sup>B NMR chemical shift values were referenced to the external standard boron signal of BF<sub>3</sub>·Et<sub>2</sub>O. The ESI (HR-MS) mass spectra were recorded on a Bruker maXis mass spectrometer. Electronic absorption spectra, fluorescence emission spectra, and time-resolved fluorescence (TRF) decay measurements were recorded on a SHIMADAZU UV-2600 spectrophotometer and FLS-980 EDINBURGH spectrometer, respectively. Time-gated emission spectra were recorded using the same FLS 980 fluorimeter by excitation source of a pulsed microsecond flash lamp (μF1) with a pulse width of 1.1 μs. Temperature-dependent emission studies were also performed using the same instrument with the help of an OXFORD cryostat. Solutions of all the compounds for spectral measurements were prepared using anhydrous spectrophotometric grade solvents and standard volumetric glassware. Quartz cuvettes with sealing screw caps were used for the solution state spectral measurements. The intensity data of crystal **1** were collected on a Bruker D8 Quest diffractometer [ $\lambda(\text{Mo K}\alpha) = 0.71073 \text{ \AA}$ ] and data reduction was performed using Apex3. The intensity data of crystal **2** were collected on an XtaLAB AFC12 (RINC) [ $\lambda(\text{Mo K}\alpha) = 0.71073 \text{ \AA}$ ] (Rigaku Oxford Diffraction, 2017) diffractometer. The data were integrated using CrysAlisPro

## Supplementary information

1.171.39.29d software. <sup>[5a,c]</sup> The structures were solved by direct methods using SHELXS-97 and refined using the SHELXL-2018/3 program (within the WinGX program package) <sup>[5b]</sup> and non-H atoms were refined anisotropically. The CCDC numbers **1** and **2** are 2288523 and 2288524 respectively. Density functional theory (DFT) calculations were done using B3LYP functional with 6-31G(d) basis set as incorporated in the Gaussian 09 package for all the atoms. <sup>[6]</sup> The optimized structures and the frontier molecular orbitals (FMOs) were viewed using Gaussview 5.0. SOC calculations were done by ORCA 5.0 software, using B3LYP functional with a 6-31G (d, p) basis set.

### 2. Synthesis details

#### 2.1 Synthesis of **P1** and **P2**

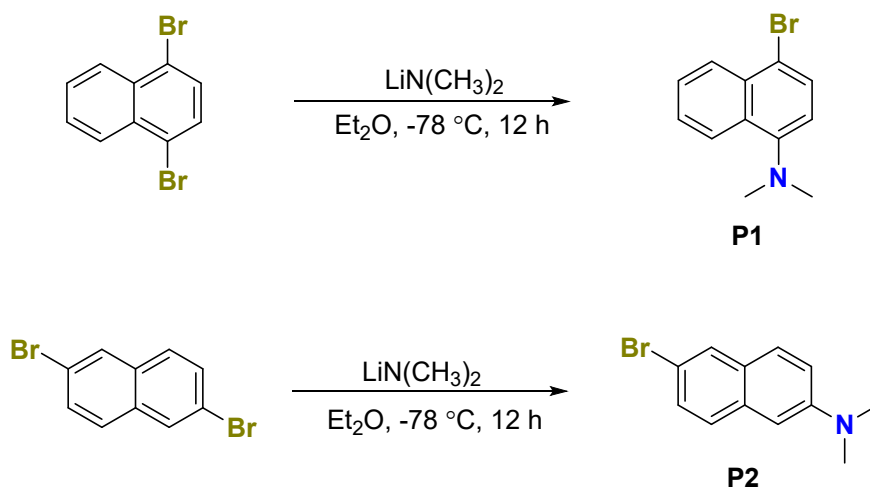

**Scheme S1.** Synthesis of precursor compounds **P1** and **P2**.

**General procedure:** To an oven-dried 100 mL Schlenk flask, 1,4-dibromo naphthalene / 2,6-dibromo naphthalene (1.00 g, 3.5 mmol) and dry  $\text{Et}_2\text{O}$  (30 mL) were added under argon atmosphere. Then lithium dimethylamide (304 mg, 3.5 mmol) in 5 mL  $\text{Et}_2\text{O}$  was added to the reaction flask at  $-78\text{ }^\circ\text{C}$ . The reaction mixture was warmed to ambient temperature and stirred for 12 h. The volatiles were removed under vacuum, the compound extracted with dichloromethane, and dried over  $\text{Na}_2\text{SO}_4$ . The final product is purified by column chromatography on silica gel using petroleum ether, to give a white solid.

## Supplementary information

**4-bromo-*N,N*-dimethylnaphthalen-1-amine (P1):** White solid. Yield: 80%.  $^1\text{H}$  NMR (300 MHz,  $\text{CDCl}_3$ ):  $\delta$  (ppm) 8.37 (s, 2H), 7.78-7.66 (m, 3H), 6.96 (d,  $J = 3.6$  Hz, 1H), 2.94 (s, 6H).

**6-bromo-*N,N*-dimethylnaphthalen-2-amine (P2):** White solid. Yield: 65%.  $^1\text{H}$  NMR (300 MHz,  $\text{CDCl}_3$ ):  $\delta$  (ppm) 7.83 (s, 1H), 7.61 (d,  $J = 9$  Hz, 1H), 7.52 (d,  $J = 8.4$  Hz, 1H), 7.42 (d,  $J = 8.4$  Hz, 1H), 7.16 (d,  $J = 8.7$  Hz, 1H), 6.87 (s, 1H), 3.05 (s, 6H).

### 2.2 Synthesis of **1** and **2**

**General procedure:** To an oven-dried 100 mL Schlenk flask, *n*-butyl lithium (2.5 M in hexane, 1.5 mmol) was added dropwise to a (15 mL)  $\text{Et}_2\text{O}$  of **P1/P2** (1.3 mmol) at  $-78$  °C for 5 min. After 4 h, an (5 mL)  $\text{Et}_2\text{O}$  solution of dimesitylfluoroborane (1.3 mmol) was added, and the reaction mixture was warmed to ambient temperature and stirred for an additional 12 h. The resulting yellow color solution was extracted with a dichloromethane/water mixture (30 mL  $\times$  3). The crude products **1** /**2** were further purified by column chromatography on silica gel using petroleum ether and characterized by multinuclear NMR spectroscopy.

#### Synthesis of 4-(dimesitylboraneyl)-*N,N*-dimethylnaphthalen-1-amine (**1**)

Quantities used for the preparation of **1** as follows: **P1** (333 mg, 1.3 mmol), *n*-butyl lithium (2.5 M in *n*-hexane, 1.91 mL, 1.5 mmol), and dimesitylboron fluoride (357 mg, 1.3 mmol). Yield: 65 %.  $^1\text{H}$  NMR (300 MHz,  $\text{CDCl}_3$ ):  $\delta$  (ppm) 8.17 (d,  $J = 8.4$  Hz, 1H), 7.62 (d,  $J = 8.1$  Hz, 1H), 7.44-7.36 (m, 2H), 7.23-7.16 (m, 1H), 6.89 (d,  $J = 7.5$  Hz, 1H), 6.77 (s, 4H), 2.94 (s, 6H), 2.28 (s, 6H), 1.95 (s, 12H);  $^{11}\text{B}$  NMR (128 MHz,  $\text{CDCl}_3$ ):  $\delta$  (ppm) 70.2;  $^{13}\text{C}$  NMR (75 MHz,  $\text{CDCl}_3$ ):  $\delta$  (ppm) 154.58, 143.87, 141.81, 140.56, 138.45, 138.14, 136.18, 128.41, 128.27, 127.88, 125.90, 124.79, 124.66, 112.56, 44.83, 23.11, 21.29; ESI (HR-MS). Calcd for  $\text{C}_{30}\text{H}_{35}\text{BN}$  [ $\text{M} + \text{H}$ ] $^+$ :  $m/z$  420.2858. Found:  $m/z$  420.2861.

#### Synthesis of 6-(dimesitylboraneyl)-*N,N*-dimethylnaphthalen-2-amine (**2**)

Quantities used for the preparation of **1** as follows: **P2** (333 mg, 1.3 mmol), *n*-butyl lithium (2.5 M in *n*-hexane 1.91 mL, 1.5 mmol), and dimesitylboron fluoride (357 mg, 1.3 mmol). Yield: 60%.  $^1\text{H}$  NMR (300 MHz,  $\text{CDCl}_3$ ):  $\delta$  (ppm) 7.98 (s, 1H), 7.73 (d,  $J = 8.7$  Hz, 1H), 7.62-7.54 (m, 2H), 7.14 (d,  $J = 8.9$  Hz, 1H), 6.93 (s, 1H), 6.88 (s, 4H), 3.11 (s, 6H), 2.36 (s, 6H), 2.09 (s, 12H);  $^{11}\text{B}$  NMR (128 MHz,  $\text{CDCl}_3$ ):  $\delta$  (ppm) 68.5;  $^{13}\text{C}$  NMR (75 MHz,  $\text{CDCl}_3$ ):  $\delta$  (ppm) 149.98, 140.94, 139.07, 138.16, 137.48, 133.38, 130.97, 128.12, 126.19, 125.25, 115.57, 105.63, 40.64, 23.54, 21.28; ESI (HR-MS). Calcd for  $\text{C}_{30}\text{H}_{35}\text{BN}$  [ $\text{M} + \text{H}$ ] $^+$ :  $m/z$  420.2858. Found:  $m/z$  420.2860.

## Supplementary information

### 3. Structural Characterization

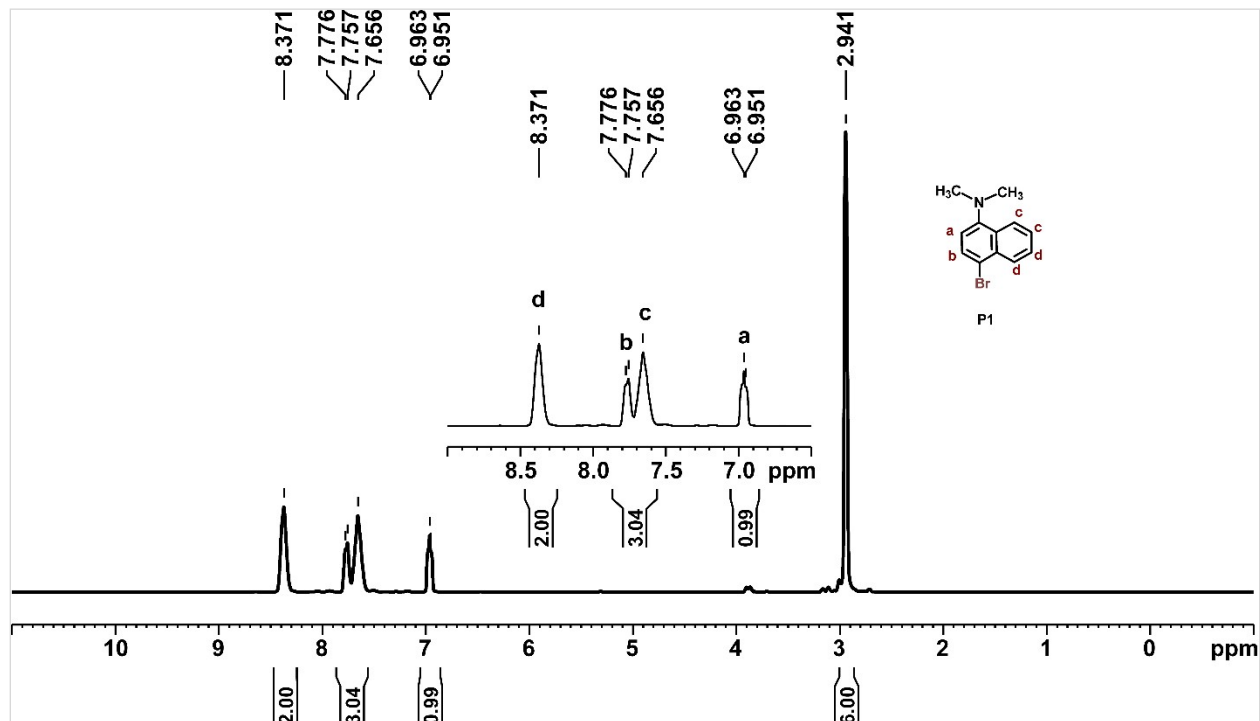

**Figure S1.**  $^1\text{H}$  NMR spectrum of **P1** in  $\text{CDCl}_3$ .

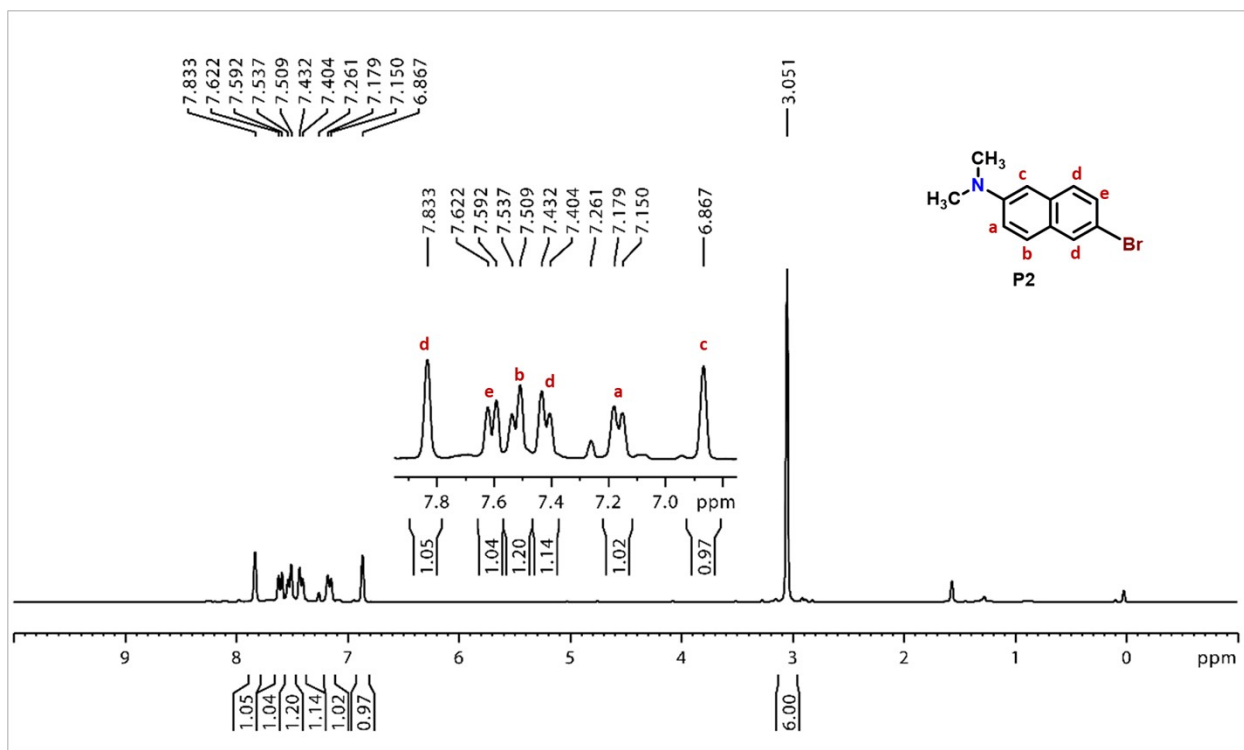

**Figure S2.**  $^1\text{H}$  NMR spectrum of **P2** in  $\text{CDCl}_3$ .

## Supplementary information

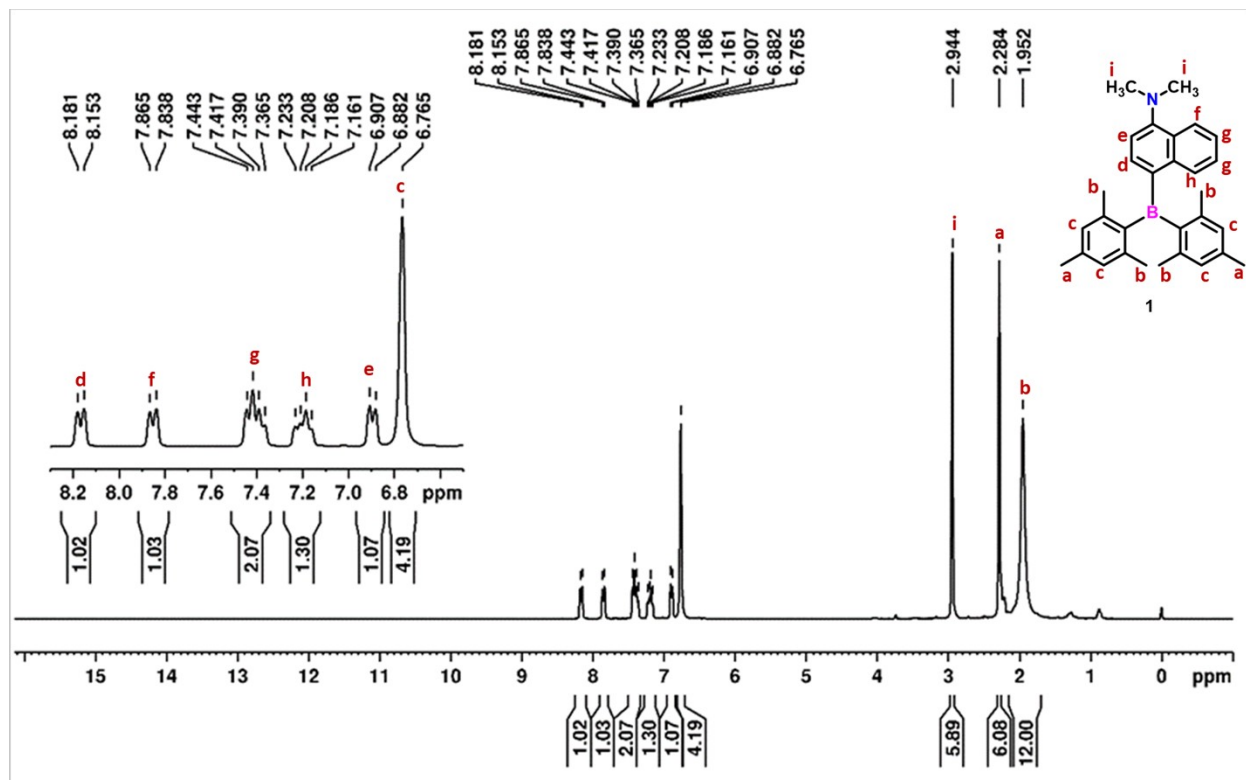

**Figure S3.**  $^1\text{H}$  NMR spectrum of **1** in  $\text{CDCl}_3$ .

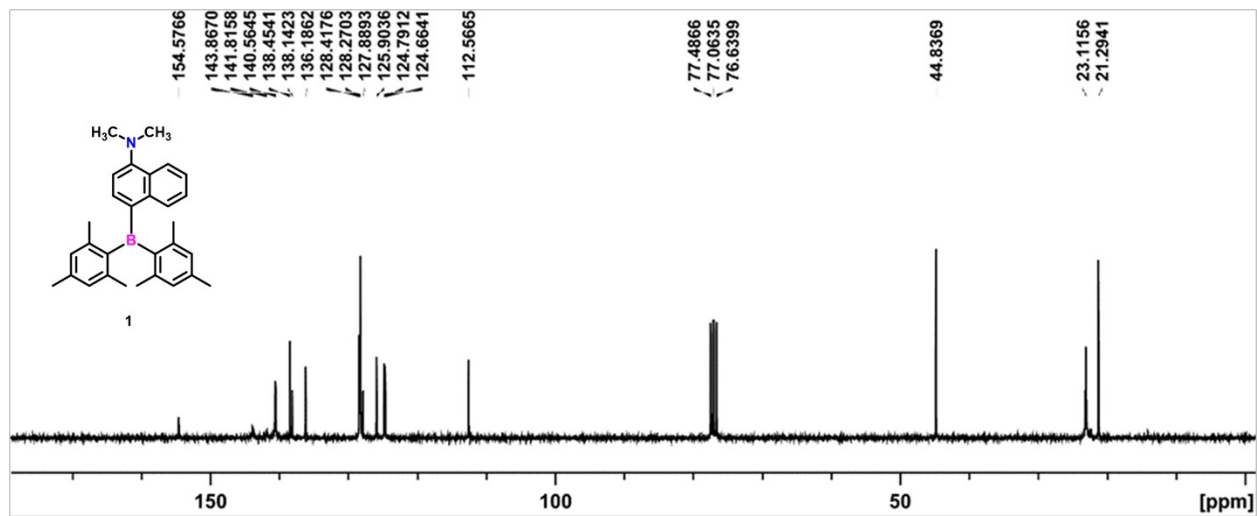

**Figure S4.**  $^{13}\text{C}$  NMR spectrum of **1** in  $\text{CDCl}_3$ .

## Supplementary information

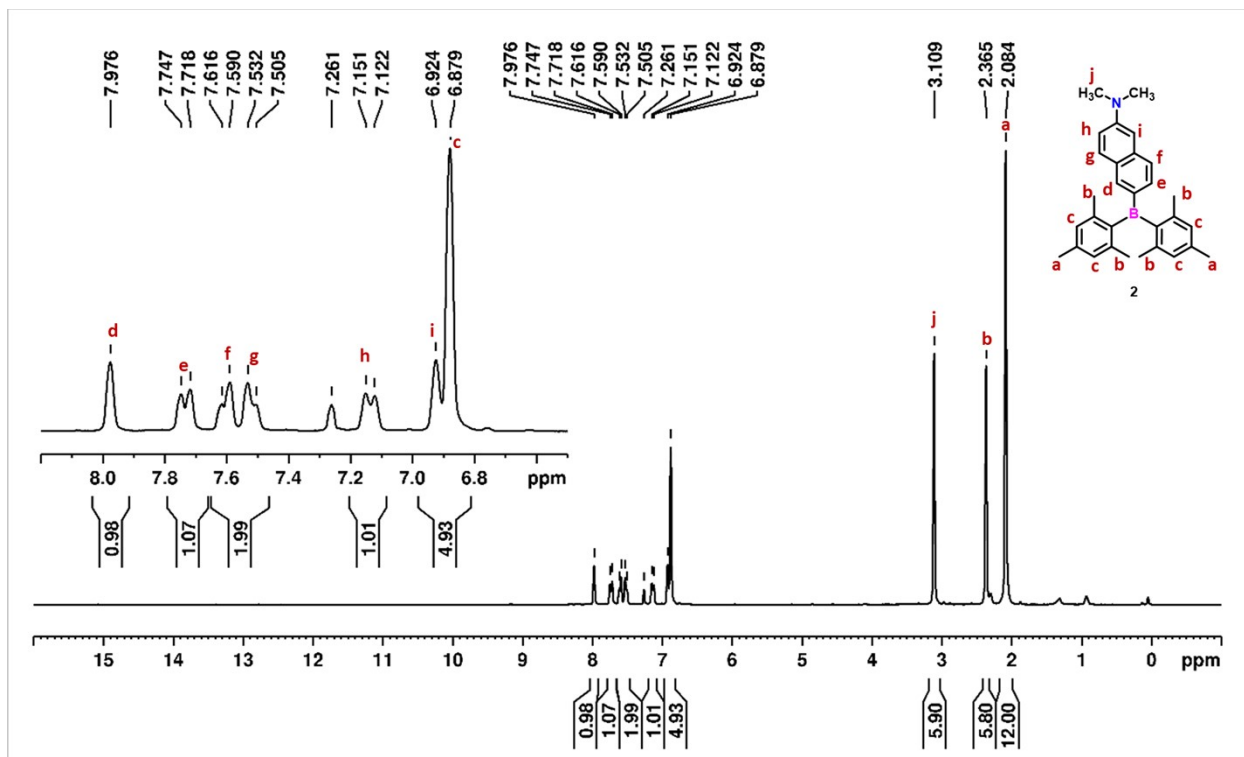

Figure S5.  $^1\text{H}$  NMR spectrum of 2 in  $\text{CDCl}_3$ .

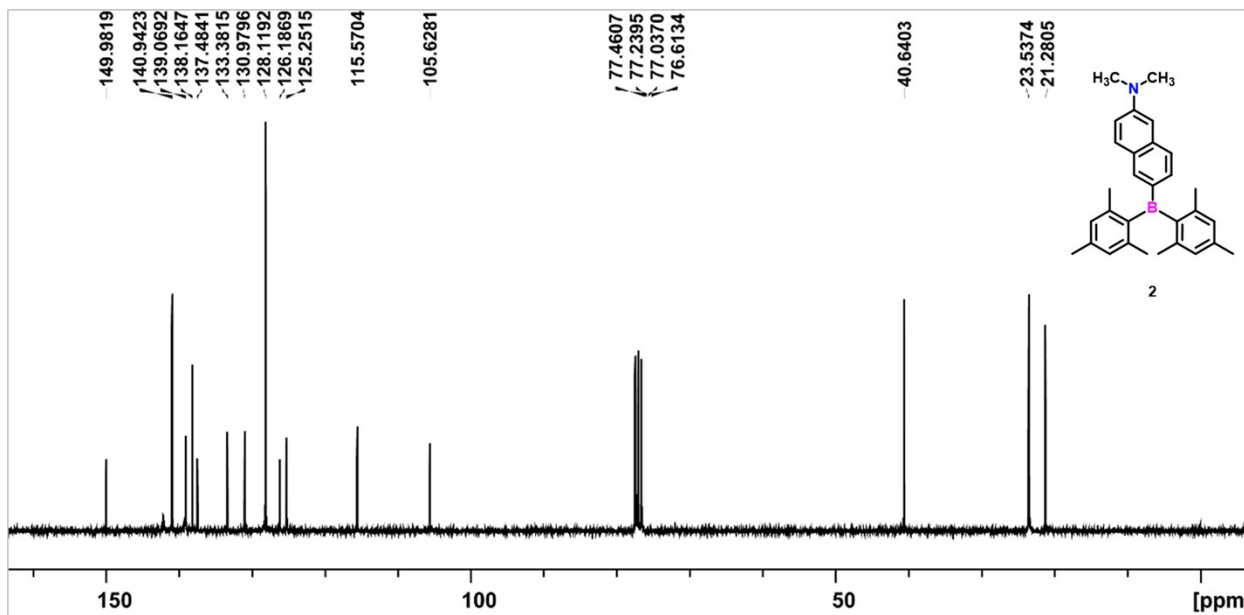

Figure S6.  $^{13}\text{C}$  NMR spectrum of 2 in  $\text{CDCl}_3$ .

## Supplementary information

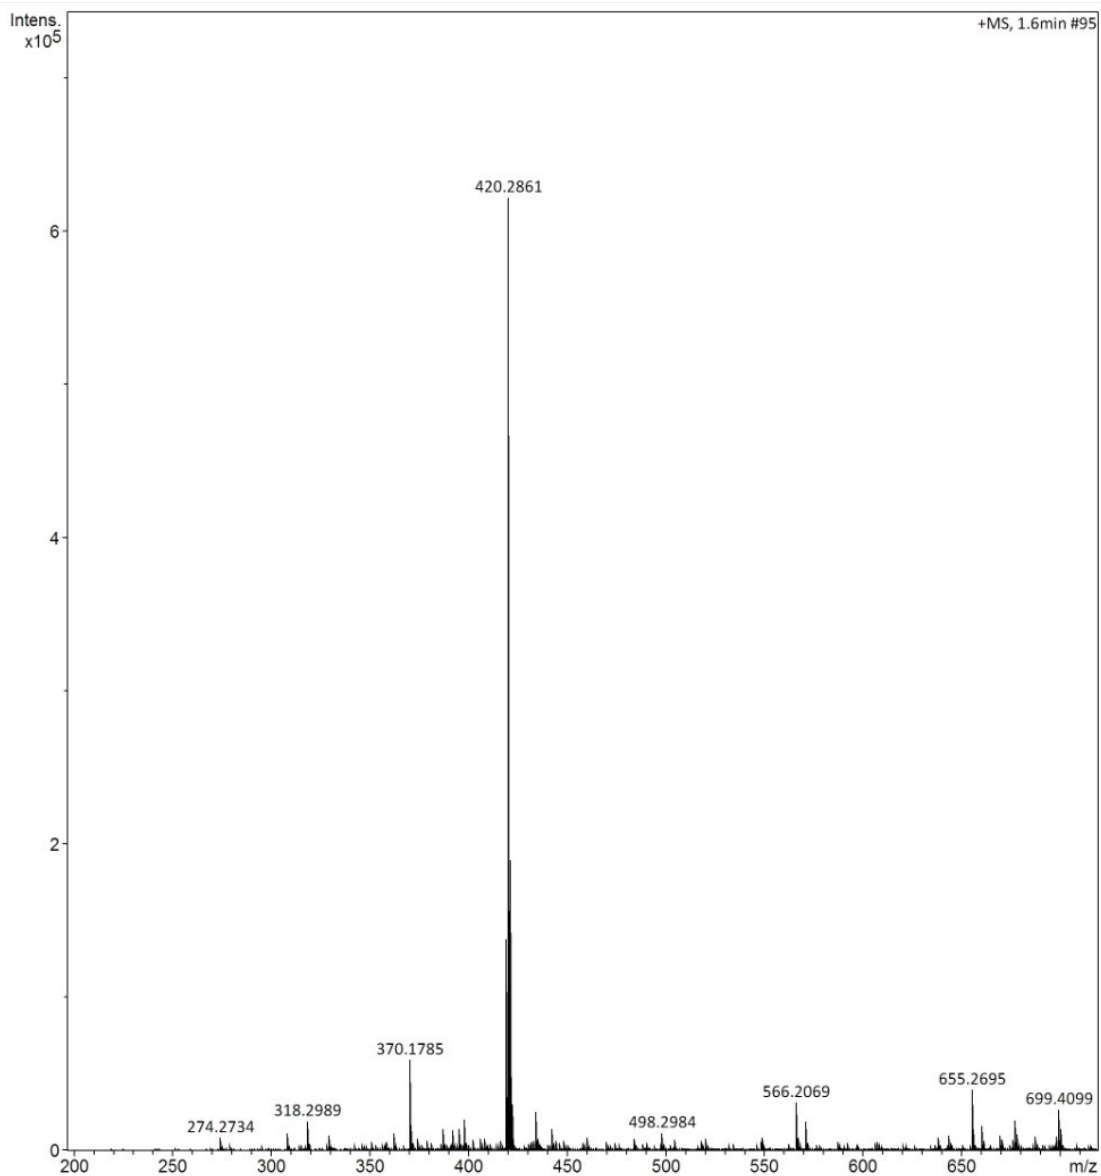

**Figure S7.** HRMS spectrum of **1**.



## Supplementary information

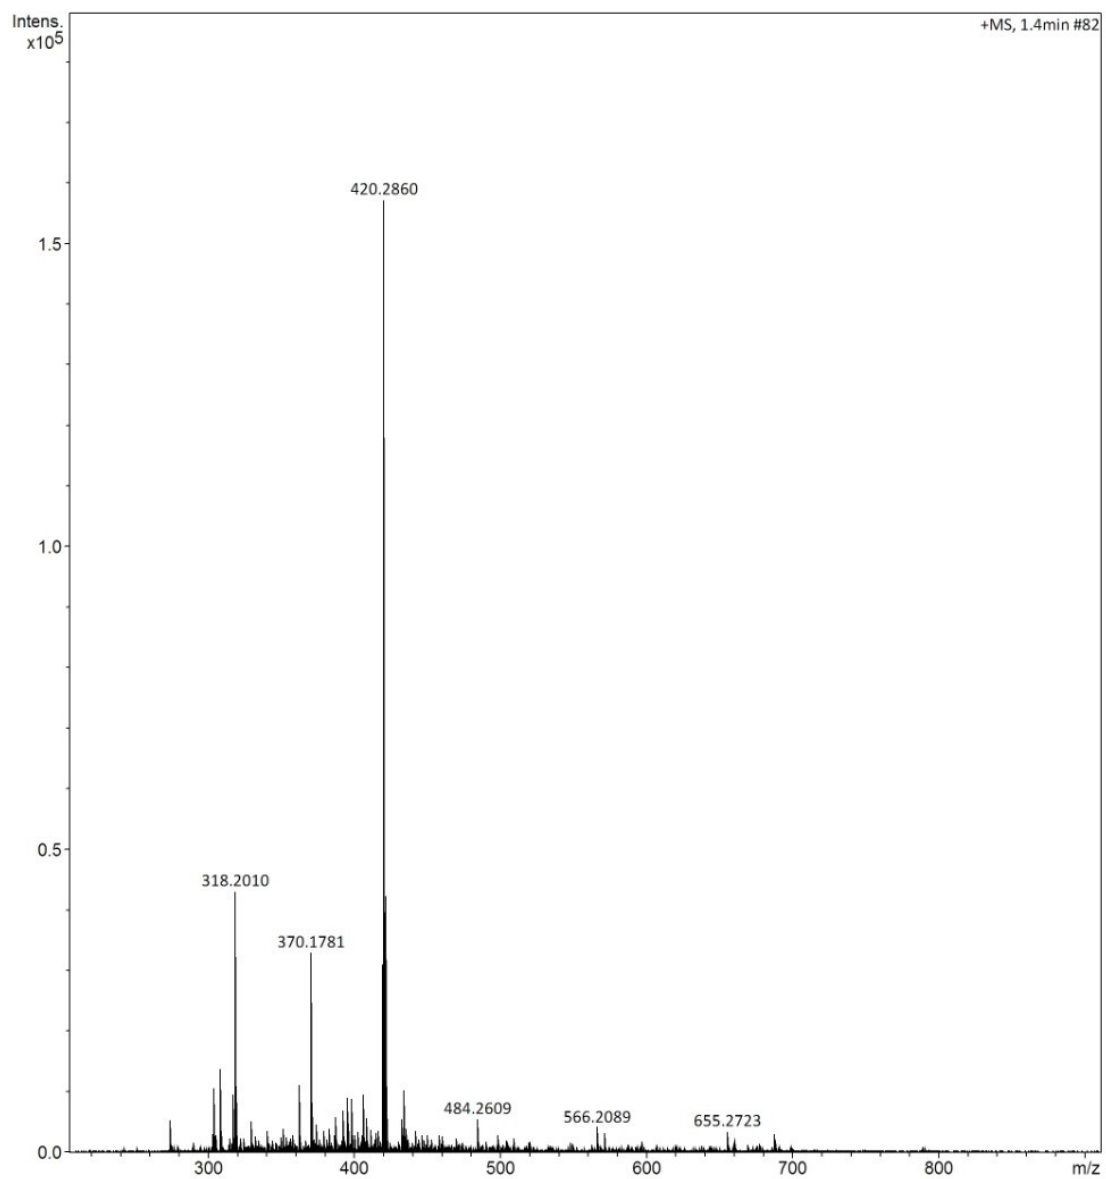

**Figure S8.** HRMS spectrum of **2**.

## Supplementary information

### 4. Single crystal X-ray diffraction Studies

|                                         | <b>1</b>                            | <b>2</b>                            |
|-----------------------------------------|-------------------------------------|-------------------------------------|
| Empirical formula                       | C <sub>30</sub> H <sub>34</sub> B N | C <sub>30</sub> H <sub>34</sub> B N |
| FW                                      | 419.39                              | 419.39                              |
| T (K)                                   | 296 K                               | 298 K                               |
| Crystal system                          | orthorhombic                        | triclinic                           |
| Space group                             | <i>P</i> 21 21 21                   | <i>P</i> -1                         |
| a/Å                                     | 8.3637(3)                           | 7.9503(4)                           |
| b/Å                                     | 14.3587(6)                          | 8.3312(4)                           |
| c/Å                                     | 21.3790(8)                          | 19.4228(9)                          |
| α/deg                                   | 90                                  | 78.527(4)                           |
| β/deg                                   | 90                                  | 89.087(4)                           |
| γ/deg                                   | 90                                  | 87.192(4)                           |
| V/Å <sup>3</sup>                        | 2567.44(17)                         | 1259.24(11)                         |
| Z                                       | 4                                   | 2                                   |
| ρ <sub>calcd</sub> (gcm <sup>-3</sup> ) | 1.085                               | 1.106                               |
| μ (Mo Kα) (mm <sup>-1</sup> )           | 0.061                               | 0.062                               |
| λ/Å                                     | 0.71073                             | 0.71073                             |
| F (000)                                 | 904.0                               | 452.0                               |
| Collected reflections                   | 5267                                | 4372                                |
| Unique reflections                      | 3071                                | 3389                                |
| Goodness of Fit (GOF) [F2]              | 1.013                               | 1.048                               |
| R1 [I>2σ(I)] <sup>[a]</sup>             | 0.0584                              | 0.0585                              |
| wR2 [I>2σ(I)] <sup>[b]</sup>            | 0.1918                              | 0.1787                              |
| CCDC Number                             | <b>2288523</b>                      | <b>2288524</b>                      |

**Table S1.** Crystallographic data and refinement parameters for **1** and **2**

<sup>[a]</sup>  $R1 = \sum ||F_o| - |F_c|| / \sum |F_o|$ . <sup>[b]</sup>  $wR2 = [\sum\{w(F_o^2 - F_c^2)^2\} / \sum\{w(F_o^2)\}]^{1/2}$

## Supplementary information

**Table S2.** Comparison of selected bond lengths [ $\text{\AA}$ ] and angles [ $^\circ$ ] for  $\text{Me}_2\text{N-C}_6\text{H}_4\text{-B(Mes)}_2$  (**R1**),  
<sup>[5]</sup> **1**, and **2**.

| Compounds | Bond length ( $\text{\AA}$ ) |          |          | Bond angle ( $^\circ$ ) |       | Dihedral angle ( $^\circ$ ) |                         |                         |
|-----------|------------------------------|----------|----------|-------------------------|-------|-----------------------------|-------------------------|-------------------------|
|           | B-C(Mes)                     | B-C(Nap) | N-C(Nap) | C-B-C                   | C-N-C | $\theta_{\text{B-N}}$       | $\theta_{\text{B-Nap}}$ | $\theta_{\text{N-Nap}}$ |
| <b>R1</b> | 1.586(2)                     | 1.545(2) | 1.368(1) | 360                     | 359.4 | 13.4                        | 19.6                    | 8.1                     |
| <b>1</b>  | 1.585(6)<br>1.571(6)         | 1.553(6) | 1.409(5) | 359.8                   | 343.2 | 57.4                        | 37                      | 61.1                    |
| <b>2</b>  | 1.581(3)<br>1.578(3)         | 1.559(3) | 1.371(2) | 360                     | 359.7 | 32.2                        | 32.1                    | 3.2                     |

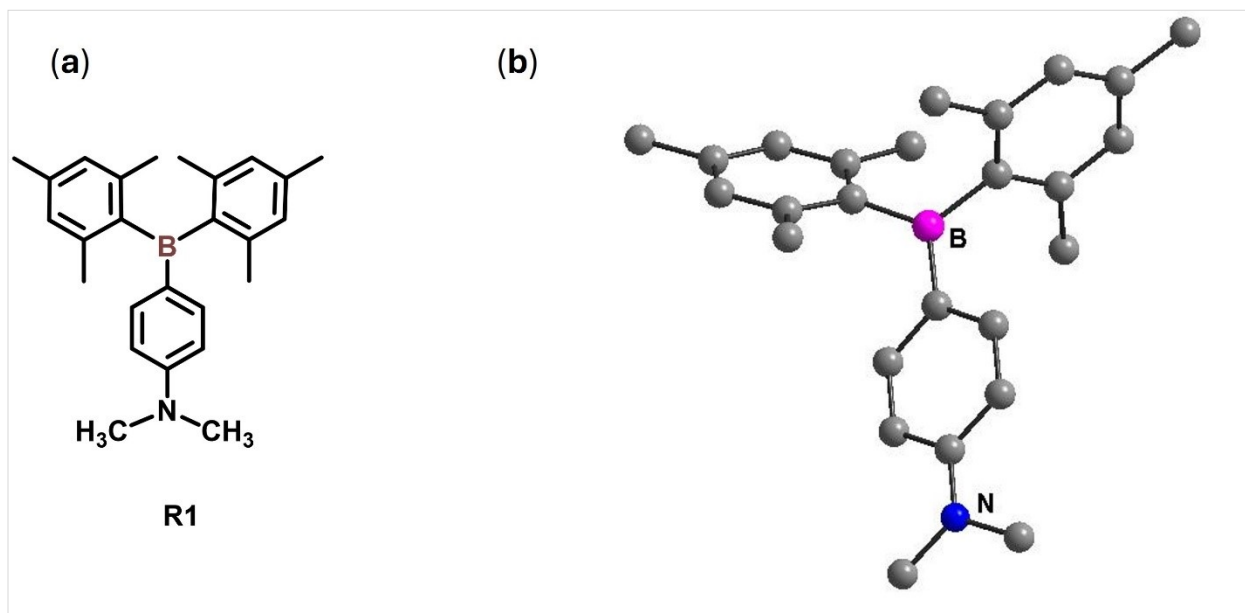

**Figure S8a.** a) Chemical structure b) molecular structure of **R1**<sup>5</sup> (All the hydrogen atoms are omitted for clarity).

## Supplementary information

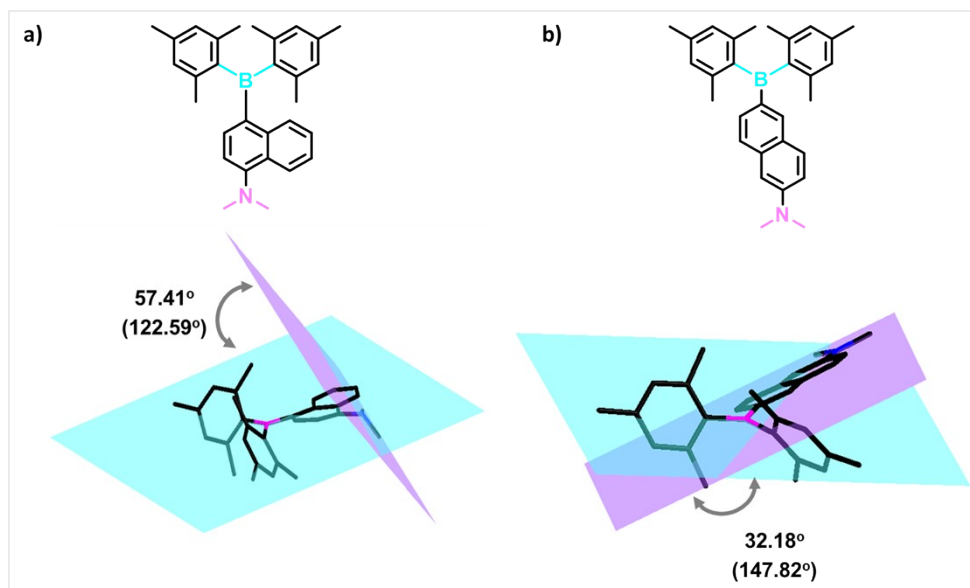

**Figure S9.** Dihedral angle ( $^\circ$ ) between the plane containing boron with carbons attached to B (cyan) and nitrogen with methyl carbon attached to N (magenta) [ $\theta_{B-N}$ ] on (a) **1** and (b) **2**. [Carbon: black, nitrogen: blue, boron: magenta, and hydrogen are omitted for clarity]. The angles mentioned in parenthesis are obtained by subtracting the exact angle measured (from the crystal structure) from  $180^\circ$ .

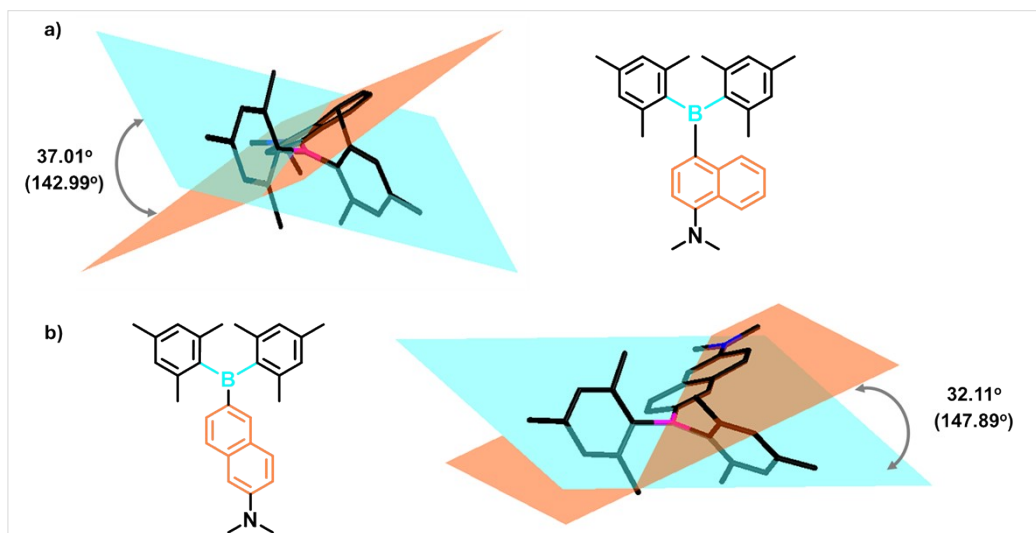

**Figure S10.** Dihedral angle ( $^\circ$ ) between the plane containing boron with carbons attached to B (cyan) and the mean plane containing all naphthalene carbon atoms (orange) [ $\theta_{B-Nap}$ ] on (a) **1** and (b) **2**. [Carbon: black, nitrogen: blue, boron: magenta, and hydrogen are omitted for clarity]. The angles mentioned in parenthesis are obtained by subtracting the exact angle measured (from the crystal structure) from  $180^\circ$ .

## Supplementary information

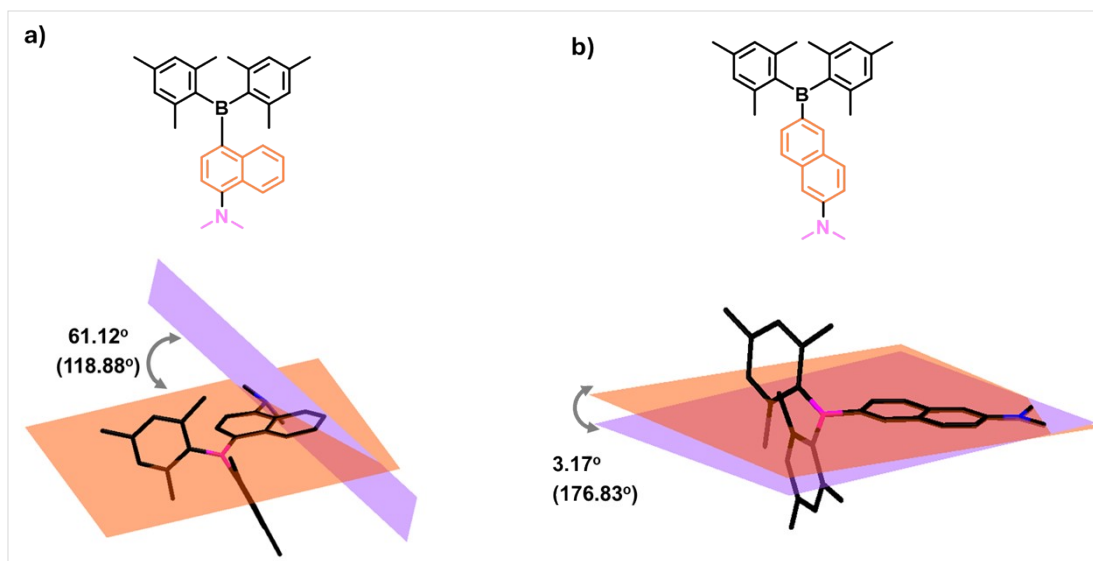

**Figure S11.** Dihedral angle ( $^\circ$ ) between the mean plane containing all naphthalene carbon atoms (orange) and nitrogen with methyl carbon attached to N (magenta) [ $\theta_{N-Nap}$ ] on (a) **1** and (b) **2**. [Carbon: black, nitrogen: blue, boron: magenta, and hydrogen are omitted for clarity]. The angles mentioned in parenthesis are obtained by subtracting the exact angle measured (from the crystal structure) from 180°.

## Supplementary information

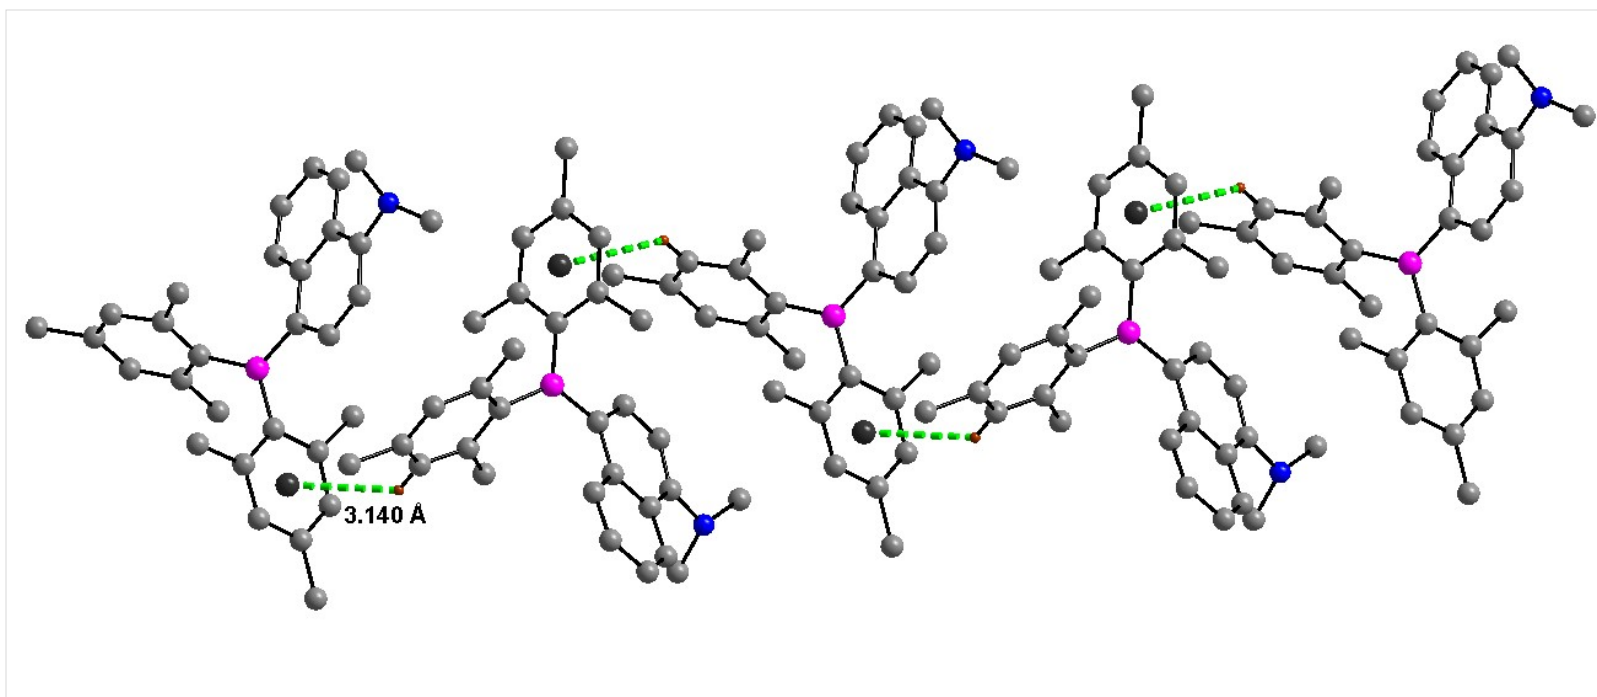

**Figure S12.** C-H $\cdots$  $\pi$  (green line) intermolecular interactions in **1** which extended in one direction and formed a 1D chain. The twisted geometry of this system constrains these molecules from forming any further interaction leading to loose packing in the 3D lattice. Hydrogen atoms are omitted for clarity. Color code: carbon (gray 50), boron (magenta), and nitrogen (blue).

## Supplementary information

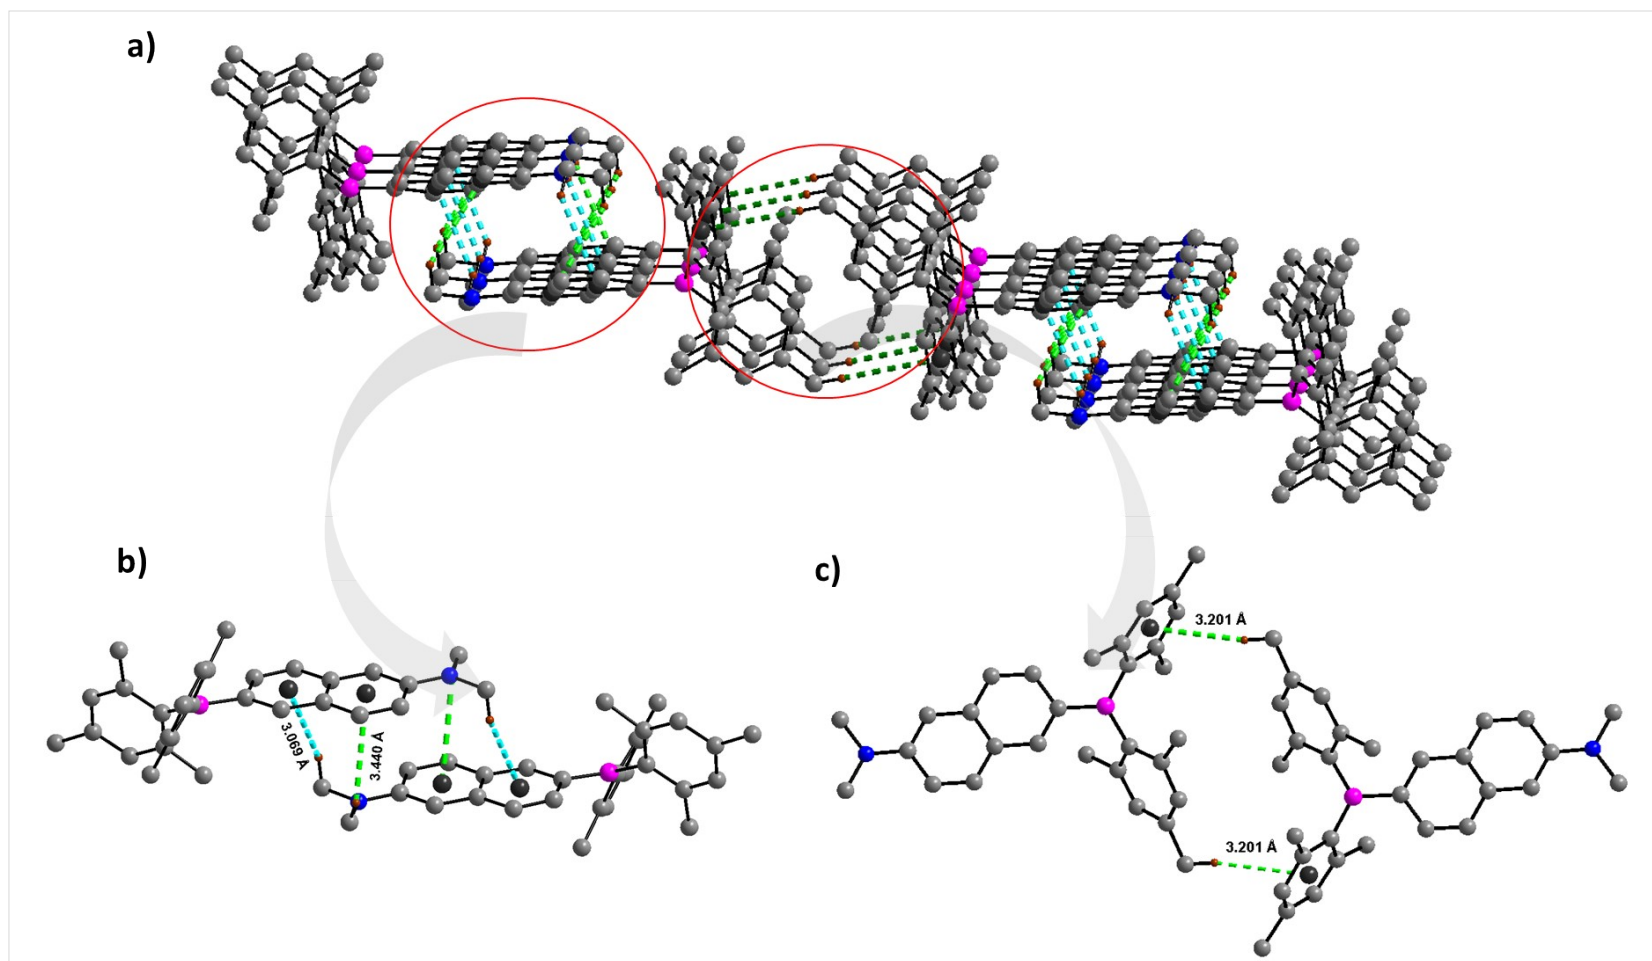

**Figure S13.** (a) Intermolecular interactions in **2** which hold the molecule to form the crystal lattice. (b) The intramolecular interaction that forms the 2D chain. [Intermolecular C-H $\cdots$  $\pi_{\text{Nap}}$  interaction between the methyl hydrogen on N of one molecule with  $\pi$  cloud of naphthalene ring on the adjacent molecule (3.069 Å and 3.440 Å)]. (c) intermolecular interaction that connects the 2D chain to form the 3D structure. [Intermolecular C-H $\cdots$  $\pi_{\text{mes}}$  interaction between the methyl hydrogen on the mesityl ring of one molecule with  $\pi$  cloud of mesityl ring on the adjacent molecule (3.201 Å)]. Hydrogen atoms are omitted for clarity. Color code: carbon (gray 50), boron (pink), and nitrogen (blue)

## Supplementary information

### 5. Photophysical and Theoretical Studies

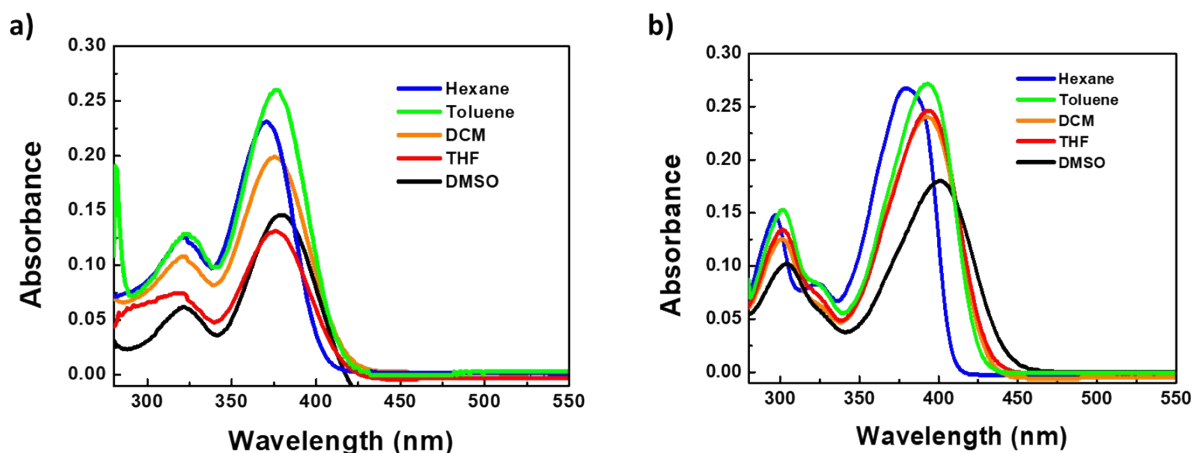

**Figure S14.** UV-visible absorption spectra of (a) **1** and (b) **2** in different solvents (conc.  $10^{-5}$  M).

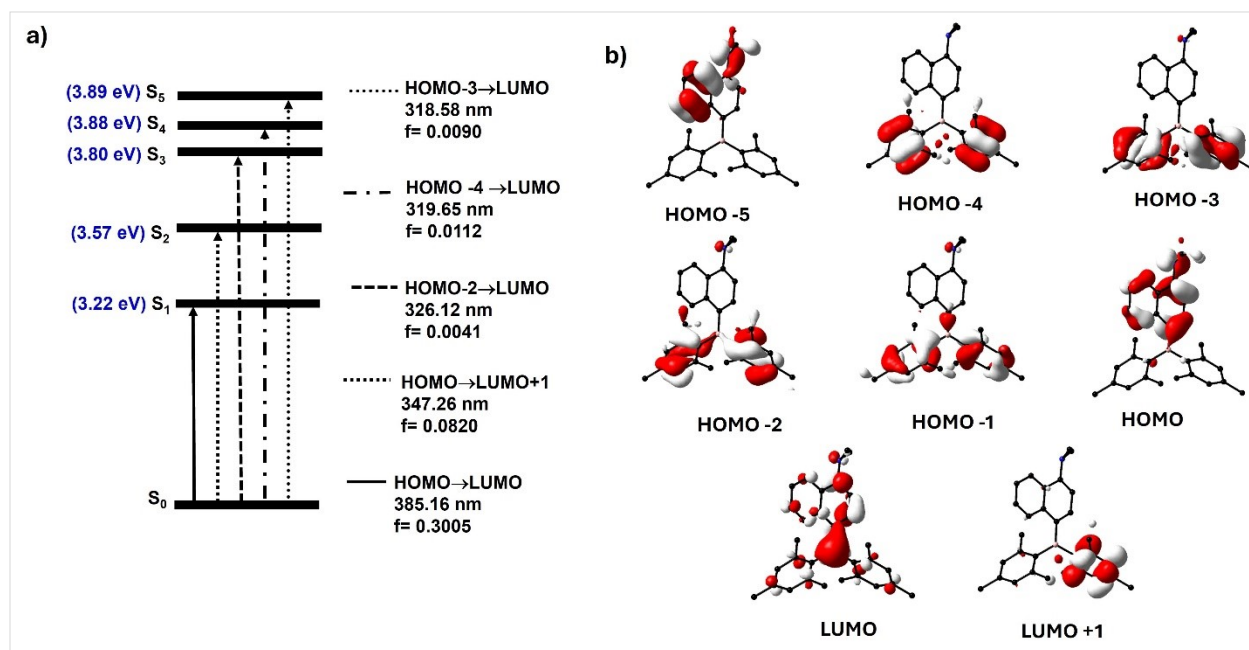

**Figure S15.** (a) Singlet energy level diagram, vertical transition involving first five singlet states, and (b) molecular orbitals involved in the transitions calculated through TD-DFT calculation using 6-31G (d, p)/B3LYP level of theory for **1**.



## Supplementary information

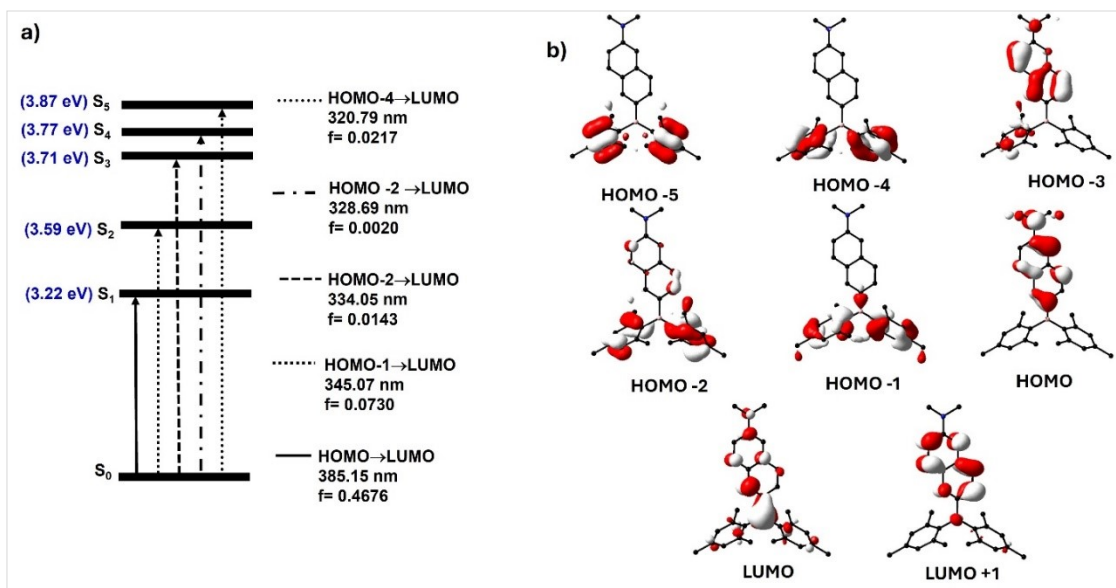

**Figure S16.** (a) Singlet energy level diagram, vertical transition involving first five singlet states, and (b) molecular orbitals involved in the transitions calculated through TD-DFT calculation using 6-31G (d,p)/B3LYP level of theory for **2**.

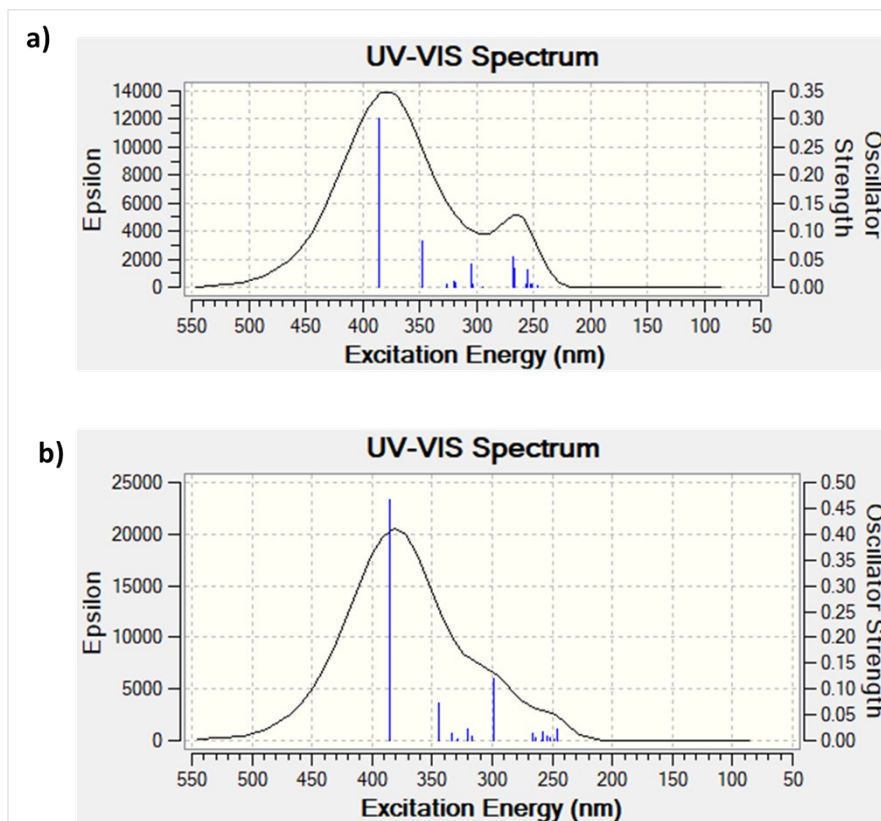

**Figure S17.** Theoretical UV-visible absorption spectra for (a) **1** and (b) **2** through TD-DFT calculation using 6-31G (d, p)/B3LYP level of theory.

## Supplementary information

**Table S3:** Comparison of different parameters for **1** and **2** obtained from crystal data and ground state optimized geometry through DFT calculation using 6-31G (d,p)/B3LYP level of theory.

| Parameter              | 1                              |                                 |         | 2                              |                                 |         |
|------------------------|--------------------------------|---------------------------------|---------|--------------------------------|---------------------------------|---------|
|                        | Ground state (S <sub>0</sub> ) | Excited state (S <sub>1</sub> ) | Crystal | Ground state (S <sub>0</sub> ) | Excited state (S <sub>1</sub> ) | Crystal |
| HOMO (eV)              | -5.27                          | -                               | -       | -5.04                          | -                               | -       |
| LUMO (eV)              | -1.56                          | -                               | -       | -1.45                          | -                               | -       |
| Band gap (eV)          | 3.71                           |                                 | -       | 3.59                           | -                               | -       |
| Dipole moment (D)      | 1.72                           | 1.54                            | -       | 4.19                           | 2.25                            | -       |
| $\Sigma_{(C-B-C)}$ (°) | 359.9                          | 359.9                           | 359.8   | 360                            | 359.7                           | 360     |
| $\Sigma_{(C-N-C)}$ (°) | 343.5                          | 357.4                           | 343.2   | 358.1                          | 360                             | 359.7   |
| B-C (Å)                | 1.570                          | 1.633                           | 1.553   | 1.561                          | 1.623                           | 1.559   |
| N-C (Å)                | 1.418                          | 1.374                           | 1.409   | 1.386                          | 1.365                           | 1.371   |
| $\theta_{D-A}$ (°)     | 79.6                           | 88.5                            | 57.4    | 28.4                           | 73.9                            | 32.2    |
| $\theta_{S-A}$ (°)     | 35.8                           | 59.8                            | 37      | 22.8                           | 73.7                            | 32.1    |
| $\theta_{D-S}$ (°)     | 61.3                           | 40.7                            | 61.1    | 12.9                           | 0.3                             | 3.2     |

## Supplementary information

**Table S4:** Summary of computed singlet vertical transitions involved in **1** through TD-DFT calculation using 6-31G (d,p)/B3LYP level of theory.

| Transitions           | E (eV) | $\lambda$ (nm) | $f$    | Dominant transitions (%)                                            |
|-----------------------|--------|----------------|--------|---------------------------------------------------------------------|
| $S_0 \rightarrow S_1$ | 3.2191 | 385.16         | 0.3005 | HOMO $\rightarrow$ LUMO (47.6)                                      |
| $S_0 \rightarrow S_2$ | 3.5704 | 347.26         | 0.0820 | HOMO $\rightarrow$ LUMO+1 (47.8)                                    |
| $S_0 \rightarrow S_3$ | 3.8018 | 326.12         | 0.0041 | HOMO-3 $\rightarrow$ LUMO (5.4)<br>HOMO-2 $\rightarrow$ LUMO (42.9) |
| $S_0 \rightarrow S_4$ | 3.8787 | 319.65         | 0.0112 | HOMO-4 $\rightarrow$ LUMO (47.8)                                    |
| $S_0 \rightarrow S_5$ | 3.8918 | 318.58         | 0.0090 | HOMO-3 $\rightarrow$ LUMO (41.9)<br>HOMO-2 $\rightarrow$ LUMO (4.7) |

**Table S5:** Summary of computed singlet vertical transitions involved in **2** through TD-DFT calculation using 6-31G (d,p)/B3LYP level of theory.

| Transitions           | E (eV) | $\lambda$ (nm) | $f$    | Dominant transitions (%)                                                                                 |
|-----------------------|--------|----------------|--------|----------------------------------------------------------------------------------------------------------|
| $S_0 \rightarrow S_1$ | 3.2191 | 385.15         | 0.4676 | HOMO $\rightarrow$ LUMO (47.9)                                                                           |
| $S_0 \rightarrow S_2$ | 3.5930 | 345.07         | 0.0730 | HOMO-1 $\rightarrow$ LUMO (48.6)                                                                         |
| $S_0 \rightarrow S_3$ | 3.7116 | 334.05         | 0.0143 | HOMO-3 $\rightarrow$ LUMO (12.4)<br>HOMO-2 $\rightarrow$ LUMO (17.9)<br>HOMO $\rightarrow$ LUMO+1 (17.4) |
| $S_0 \rightarrow S_4$ | 3.7720 | 328.69         | 0.0020 | HOMO-3 $\rightarrow$ LUMO (14.6)<br>HOMO-2 $\rightarrow$ LUMO (28.7)<br>HOMO $\rightarrow$ LUMO+1 (3.9)  |
| $S_0 \rightarrow S_5$ | 3.8650 | 320.79         | 0.0217 | HOMO-4 $\rightarrow$ LUMO (45.7)<br>HOMO $\rightarrow$ LUMO+1 (1.6)                                      |

## Supplementary information

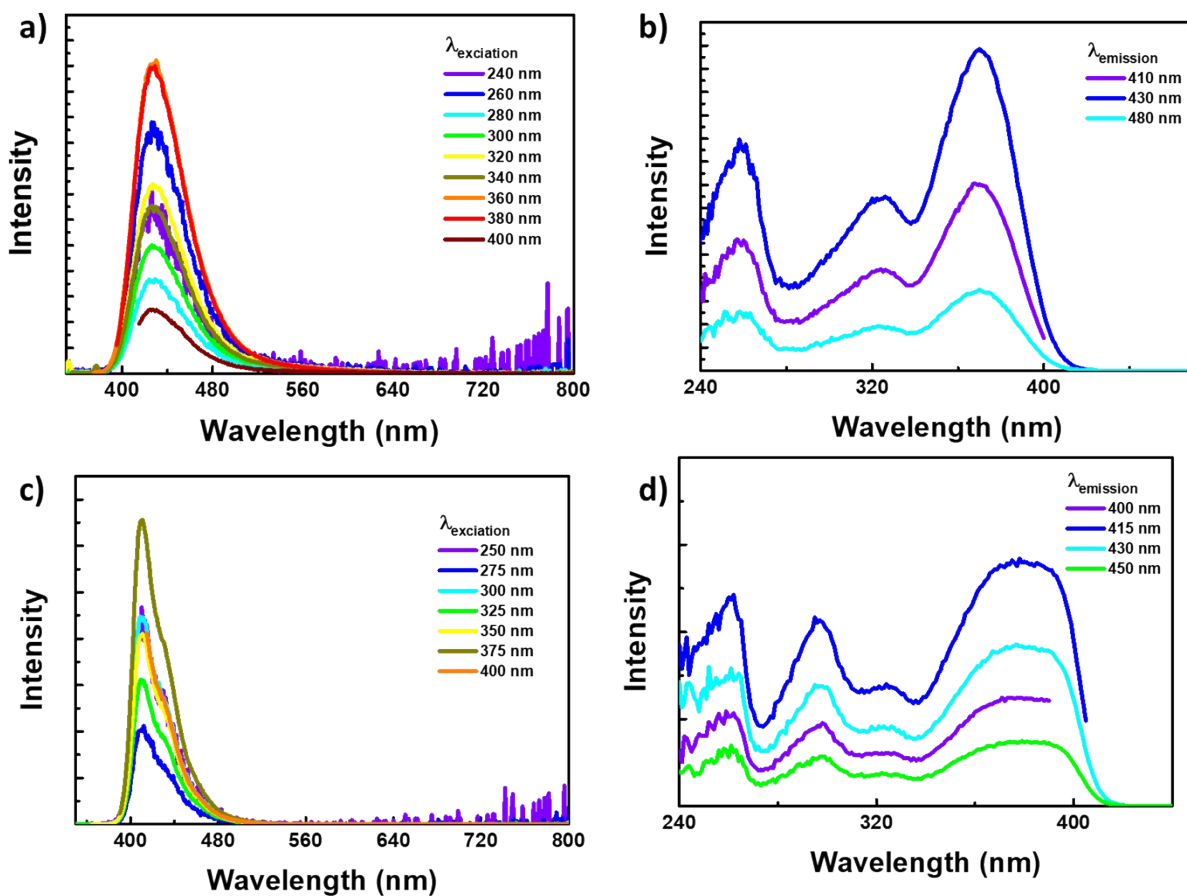

**Figure S18.** (a,c) PL spectra at different excitation (b,d) Excitation spectra at different emission wavelengths for **1** (a,b) and **2** (c,d) (as prepared solid) at 298K under ambient conditions.

## Supplementary information

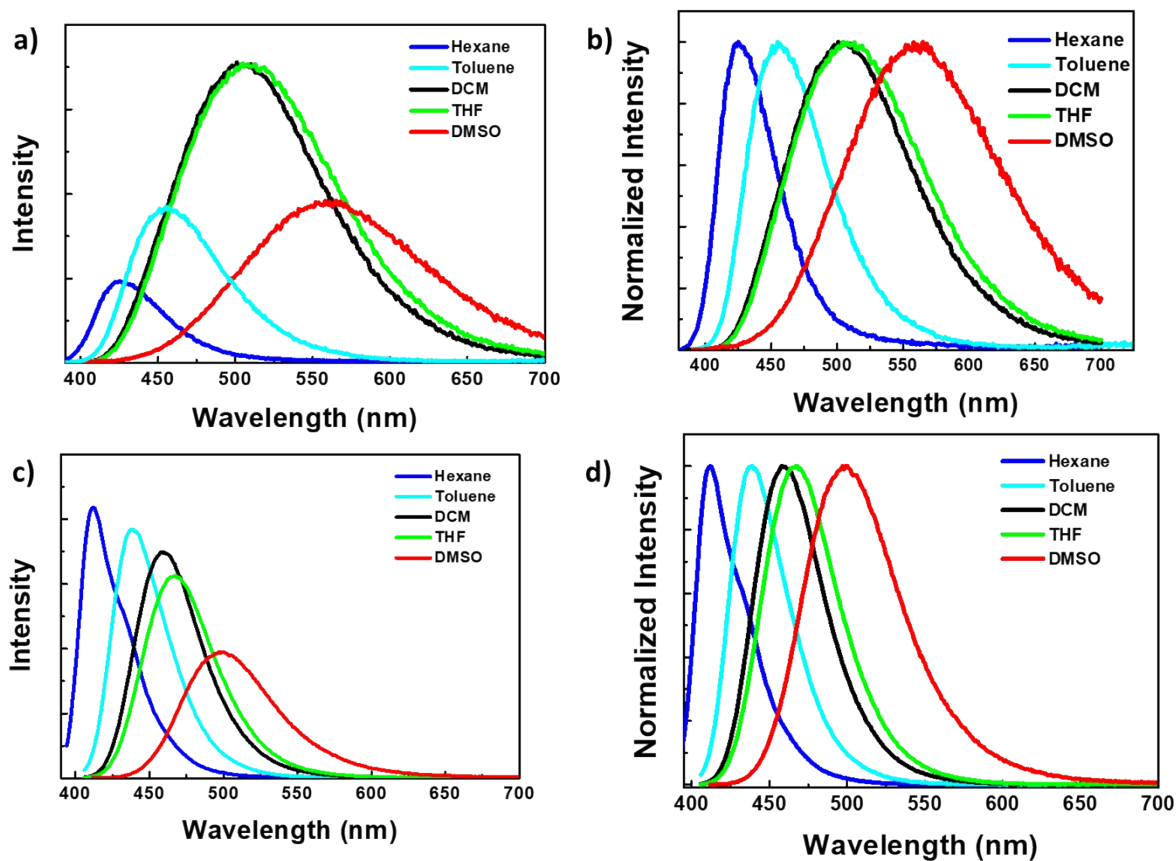

**Figure S19.** Photoluminescence spectra (PL) of compound (a, b) **1** and **2** (c, d) in different solvents (conc.  $10^{-5}$  M) at  $\lambda_{\text{ex}} = 380$  nm respectively. [b, d are normalized PL spectra; the normalization is done to **1**]. Photoluminescence spectra of **1** and **2** in hexane (conc.  $10^{-5}$  M)

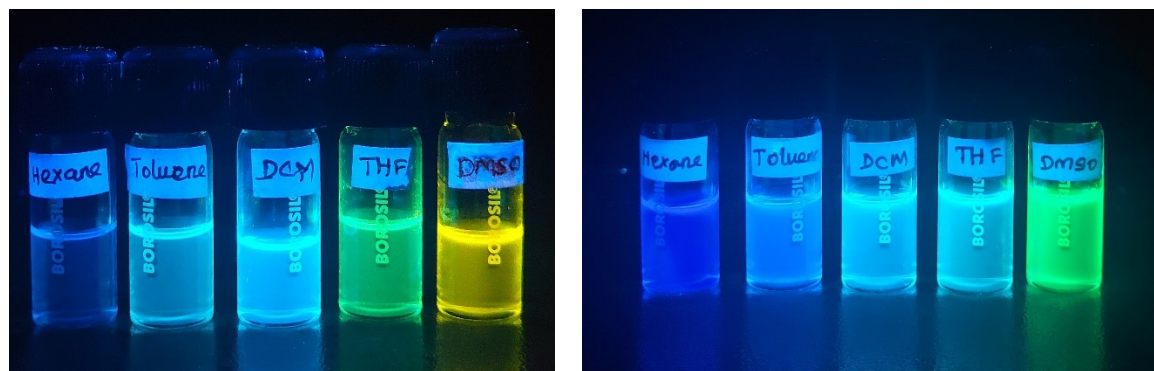

**Figure S20.** Images of compounds **1** (left) and **2** (right) under UV light in different solvents ( $\lambda_{\text{ex}} = 365$  nm)

## Supplementary information

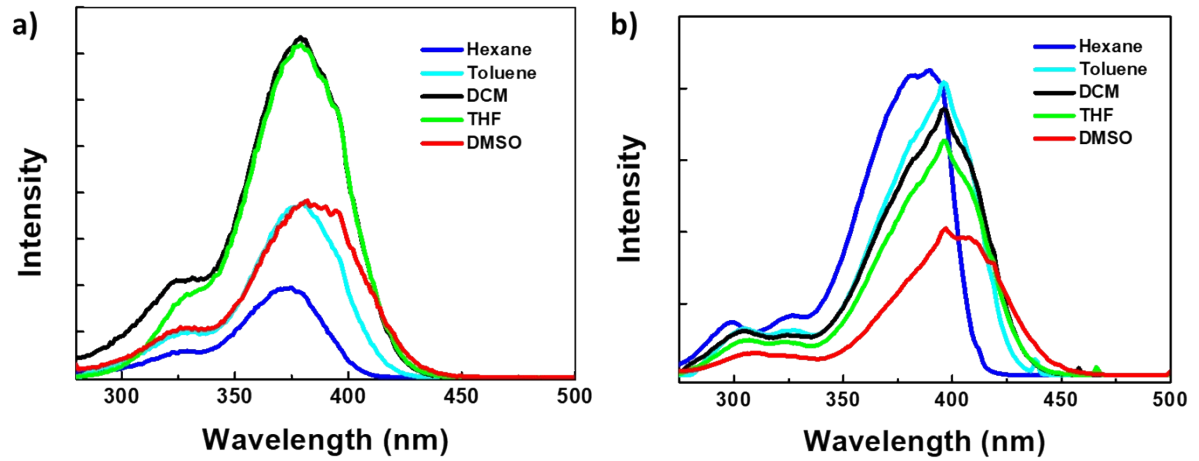

**Figure S21.** Excitation spectra of compound (a) **1**, (b) **2** at corresponding emission maxima in different solvents (conc.  $10^{-5}$  M).

## Supplementary information

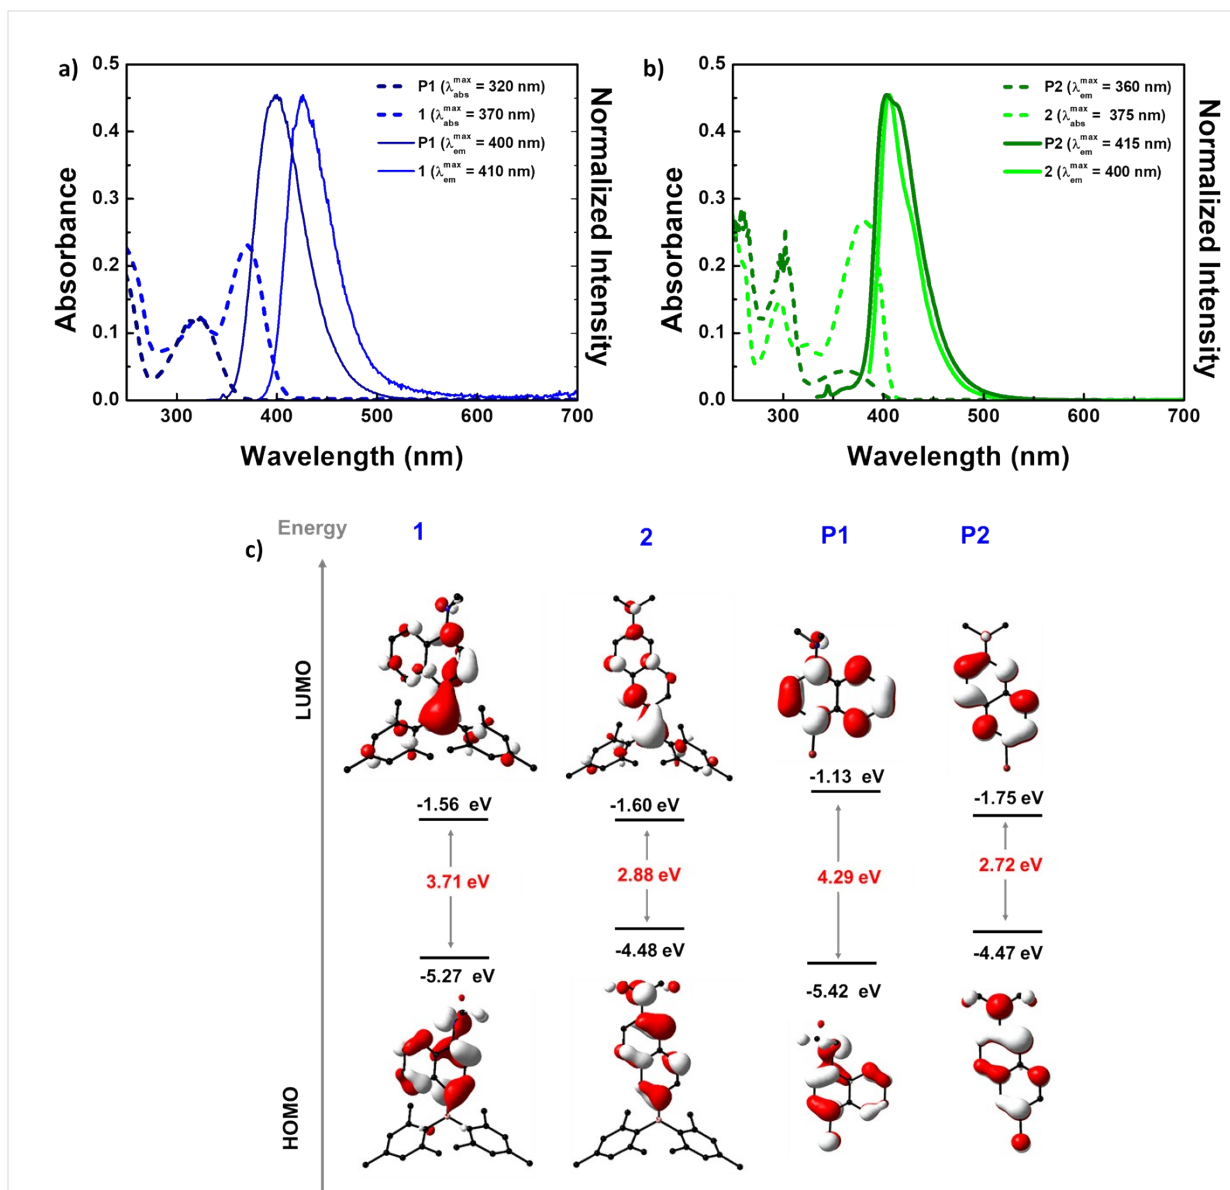

**Figure S22.** (a) UV-visible absorption and PL spectra [ $\lambda_{\text{ex}} = 320$  nm for **P1**, 300 nm for **P2**, and 380 nm for **1** and **2** in DCM (conc. $10^{-5}$  M) (b) UV-visible absorption and PL spectra [ $\lambda_{\text{ex}} = 320$  nm for **P1**, 300 nm for **P2**, and 380 nm for **1** and **2** respectively] in hexane (conc. $10^{-5}$  M) and (c) frontier molecular orbitals (iso value = 0.04) generated from the ground state  $S_0$  geometries using the B3LYP/6-31G (d, p) level of theory for **P1**, **P2**, **1**, and **2**.

## Supplementary information

**Table S6:** Important absorption, and emission parameters along with lifetime and photoluminescence quantum yield (PLQY) data for **1** and **2** in different solvents (conc.  $10^{-5}$  M).

|          | Solvent                    | $\lambda_{\text{abs}}$ [nm]<br>( $\epsilon$ ) [ $\text{mol}^{-1} \text{L cm}^{-1}$ ] | $\lambda_{\text{em}}$<br>[nm] | PL lifetime [ns]<br>$\lambda_{\text{ex}} = 375 \text{ nm}$ |                        | PLQY [%] |
|----------|----------------------------|--------------------------------------------------------------------------------------|-------------------------------|------------------------------------------------------------|------------------------|----------|
|          |                            |                                                                                      |                               | $\tau_1$ ( $A_1$ in %)                                     | $\tau_2$ ( $A_2$ in %) |          |
| <b>1</b> | Hexane                     | 320 (12000)<br>370 (23000)                                                           | 423                           | 0.44 (86.54)                                               | 2.66 (13.46)           | 6.9      |
|          | Toluene                    | 323 (12000)<br>376 (26000)                                                           | 455                           | 3.89 (100)                                                 |                        | 44.4     |
|          | DCM                        | 320 (10000)<br>375 (19000)                                                           | 504                           | 9.36 (100)                                                 | -                      | 49.2     |
|          | THF                        | 316 (7000)<br>376 (13000)                                                            | 510                           | 9.31 (100)                                                 | -                      | 50.5     |
|          | DMSO                       | 320 (6000)<br>379 (14000)                                                            | 558                           | 10.01 (100)                                                |                        | 33.2     |
| <b>2</b> | Hexane                     | 297 (14000)<br>380 (26000)                                                           | 412                           | 2.94 (100)                                                 | -                      | 71.6     |
|          |                            |                                                                                      | 430                           | 2.93 (100)                                                 | -                      |          |
|          | Toluene                    | 301 (15000)<br>392 (27000)                                                           | 440                           | 3.27 (100)                                                 |                        | 82.9     |
|          | DCM                        | 301 (12000)<br>392 (24000)                                                           | 459                           | 3.46 (100)                                                 |                        | 94.4     |
|          | THF                        | 301 (13000)<br>393 (24000)                                                           | 467                           | 3.81 (100)                                                 |                        | 92.3     |
| DMSO     | 303 (10000)<br>401 (18000) | 499                                                                                  | 4.41 (100)                    |                                                            | 86.7                   |          |



## Supplementary information

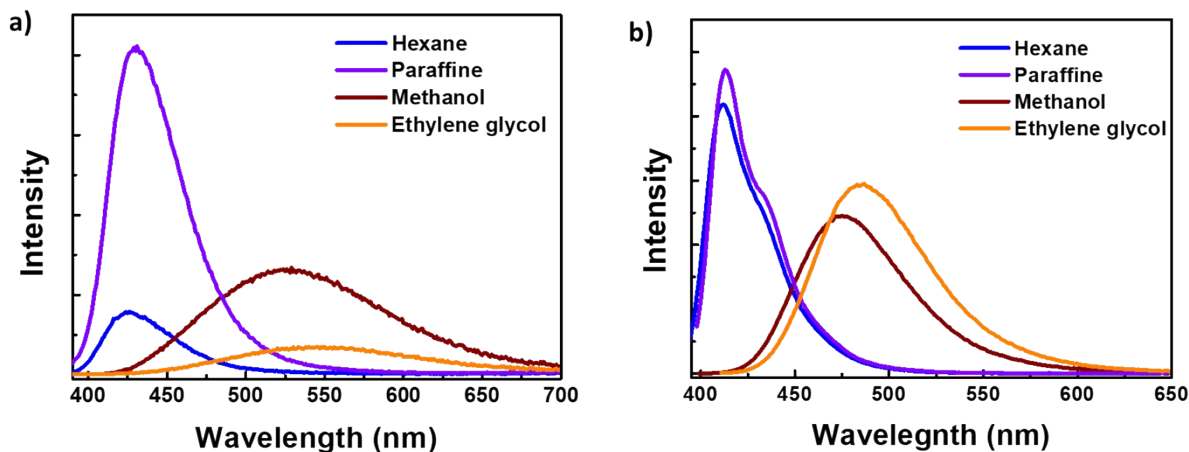

**Figure S23.** PL spectra of (a) **1** and (b) **2** in different viscous solvents [Hexane: nonpolar; non-viscous, Paraffine; nonpolar; viscous, Methanol; polar; non-viscous, and ethylene glycol; polar; viscous] at  $\lambda_{\text{ex}}=380$  nm.

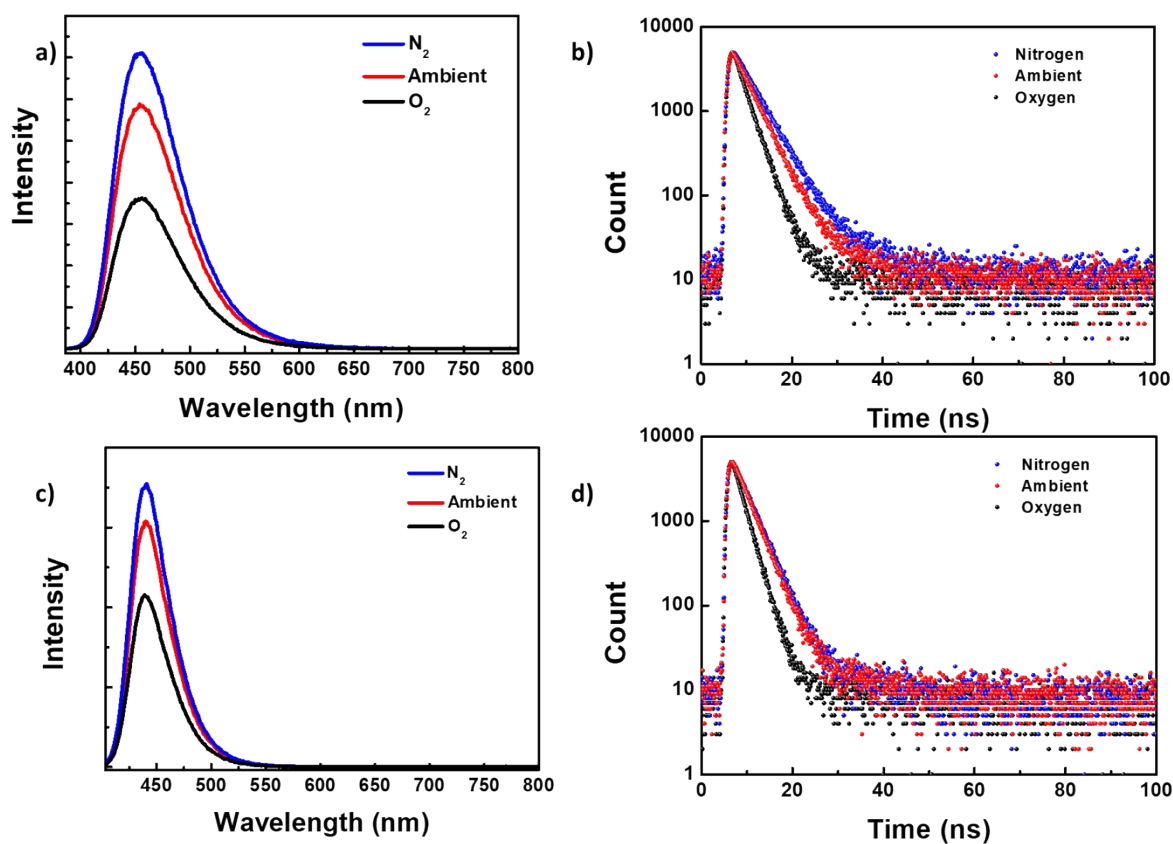

**Figure S24.** (a, c) PL spectra at  $\lambda_{\text{ex}}=380$  nm and (b, d) fluorescence decay for **1** (a,b) and **2** (c, d) in degassed toluene (conc.  $10^{-5}$  M) under nitrogen, ambient, and oxygen atmospheric at  $\lambda_{\text{ex}}=380$  nm and  $\lambda_{\text{em}}=455$  nm (**1**), 440 nm (**2**).

## Supplementary information

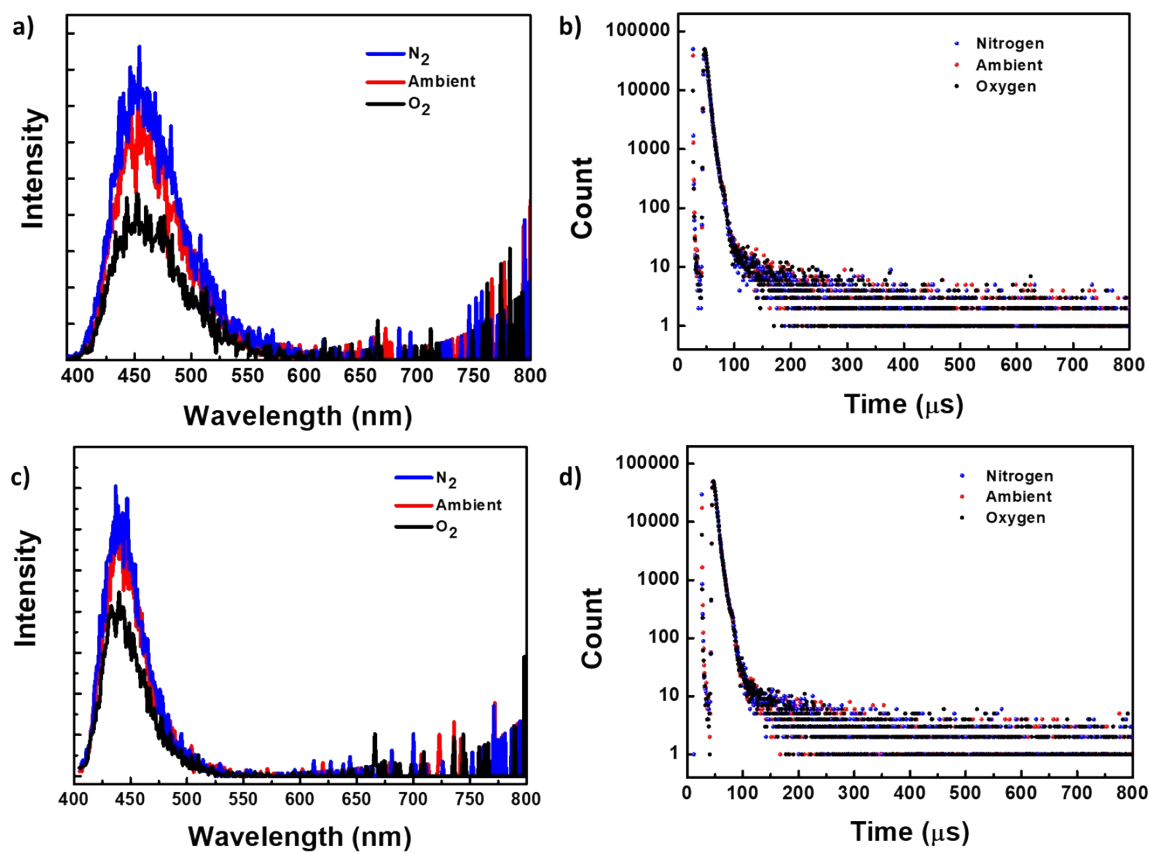

**Figure S25.** (a, c) Time-gated (delayed) (20  $\mu$ s delay) PL spectra at  $\lambda_{ex} = 380$  nm and (b, d) delayed fluorescence decay for **1** (a, b) and **2** (c, d) in degassed toluene (conc.  $10^{-5}$  M) under nitrogen, ambient, and oxygen atmospheric at  $\lambda_{ex} = 380$  nm and  $\lambda_{em} = 455$  nm (**1**), 440 nm (**2**).

## Supplementary information

### The equation for Calculating Rate constance<sup>7</sup>

$$k_r^{PF} = \frac{\phi_{PF}}{\tau_{PF}}$$

$$k_r^{DF} = \frac{\phi_{DF}}{\tau_{DF}}$$

$$k_{Total}^{PF} = \frac{1}{\tau_{PF}}$$

$$k_{Total}^{DF} = \frac{1}{\tau_{DF}}$$

$$k_{nr}^{ISC} = \frac{\phi_{DF} k_{Total}^{PF}}{\phi_{total}}$$

$$k_{nr}^{rISC} = \frac{\phi_{DF} k_{Total}^{PF} k_{Total}^{DF}}{k_{nr}^{ISC} \phi_{PF}}$$

$$k_{nr}^S = \frac{1}{\tau_{PF}} - (k_r^{PF} + k_{nr}^{ISC})$$

$k_{Total}^{PF}$  = Total decay Rate of prompt component

$k_{Total}^{DF}$  = Total decay rate of delayed component

$k_r^{PF}$  = Radiative decay rate of prompt component

$k_r^{DF}$  = Radiative decay rate of delayed component

$k_{nr}^{ISC}$  = Rate of intersystem crossing

$k_{nr}^{rISC}$  = Rate of reverse intersystem crossing

$k_{nr}^S$  = Non radiative decay rate from  $S_1$

$\tau_{PF}$  = Lifetime of Prompt component

$\tau_{DF}$  = Lifetime of Prompt component

$\phi_{total}$  = Total photoluminescence quantum yield

$\phi_{PF}$  = Prompt fluorescence quantum yield

$\phi_{DF}$  = Deleyed fluorescence quantum yield

## Supplementary information

**Table S7.** Fluorescence, delayed fluorescence lifetime, and total PLQY for **1** and **2** in toluene (conc.  $10^{-5}$  M) under nitrogen, ambient, and oxygen atmospheric conditions.

| Environment     | $\lambda_{\text{ex}}(\text{nm})$ | $\lambda_{\text{em}}(\text{nm})$ | Fluorescence lifetime (ns) | Delayed fluorescence ( $\mu\text{s}$ ) |                        | PLQY [%] |
|-----------------|----------------------------------|----------------------------------|----------------------------|----------------------------------------|------------------------|----------|
|                 |                                  |                                  | $\tau_1$ (%)               | $\tau_1$ ( $A_1$ in %)                 | $\tau_2$ ( $A_2$ in %) |          |
| <b>1</b>        |                                  |                                  |                            |                                        |                        |          |
| <b>Nitrogen</b> | 375                              | 455                              | 4.57 (100)                 | 4.03 (80.53)                           | 10.18 (19.47)          | 47.9     |
| <b>Ambient</b>  | 375                              | 455                              | 3.89 (100)                 | 4.07 (84.21)                           | 11.06 (15.79)          | 44.3     |
| <b>Oxygen</b>   | 375                              | 455                              | 2.66 (100)                 | 4.00 (80.56)                           | 9.97 (19.44)           | 24.0     |
| <b>2</b>        |                                  |                                  |                            |                                        |                        |          |
| <b>Nitrogen</b> | 395                              | 440                              | 3.52 (100)                 | 4.15 (77.37)                           | 10.05 (22.63)          | 93.4     |
| <b>Ambient</b>  | 395                              | 440                              | 3.27 (100)                 | 4.16 (79.95)                           | 9.94 (20.05)           | 82.9     |
| <b>Oxygen</b>   | 395                              | 440                              | 2.29 (100)                 | 3.91 (72.71)                           | 9.52 (27.29)           | 53.3     |

## Supplementary information

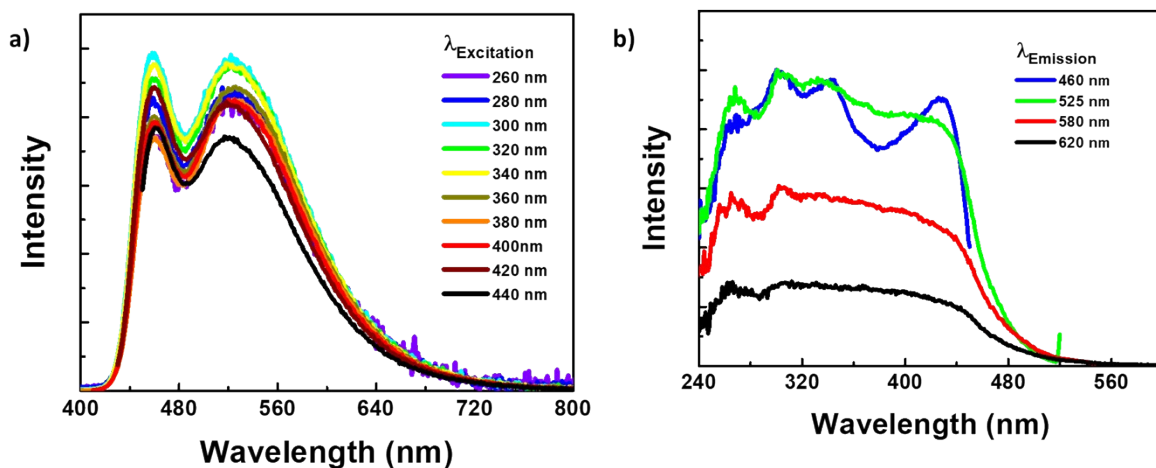

**Figure S26.** (a) PL spectra at different excitation (b) excitation spectra at different emission wavelengths for **1** (as prepared solid) at 298K under ambient conditions.

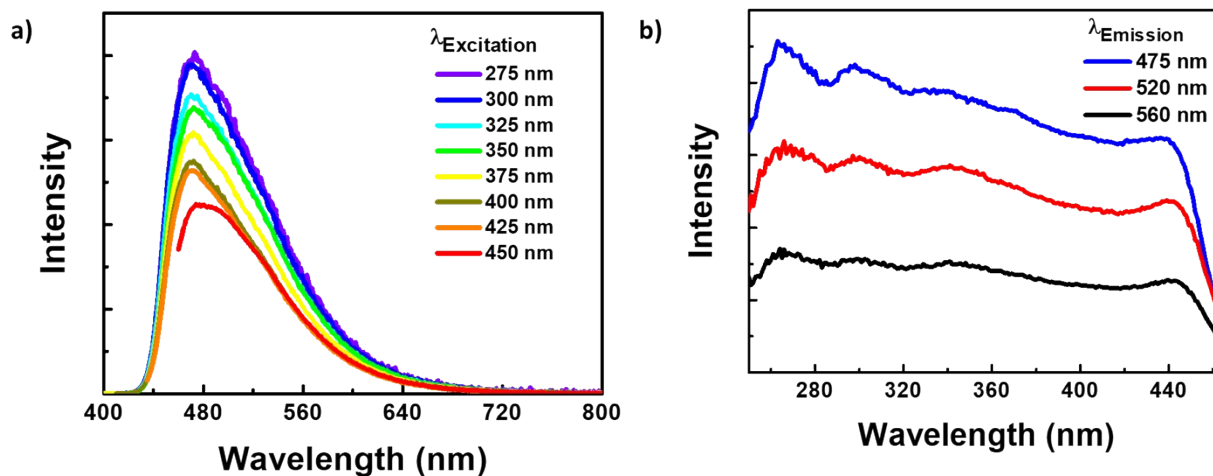

**Figure S27.** (a) PL spectra at different excitation (b) excitation spectra at different emission wavelengths for **2** (as prepared crystals) at 298K under ambient conditions.

## Supplementary information

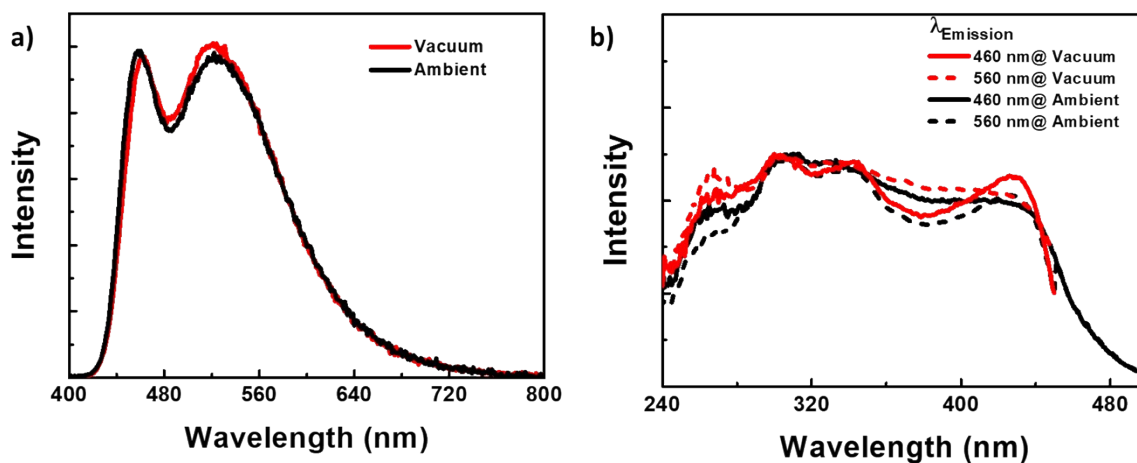

**Figure S28.** (a) PL spectra at  $\lambda_{\text{ex}} = 380$  nm (b) excitation spectra at different emission wavelength for **1** (as prepared crystals) at 298K under vacuum (absence of oxygen) and ambient conditions (presence of oxygen).

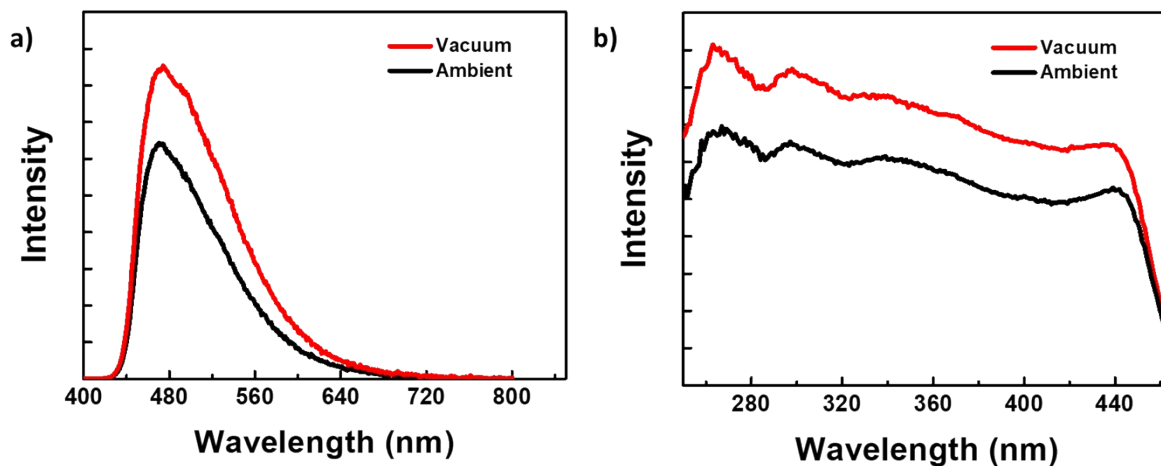

**Figure S29.** (a) PL spectra at  $\lambda_{\text{ex}} = 380$  nm (b) excitation spectra at  $\lambda_{\text{em}} = 475$  nm for **2** (as prepared solid) at 298K under vacuum (absence of oxygen) and ambient conditions (presence of oxygen).

## Supplementary information

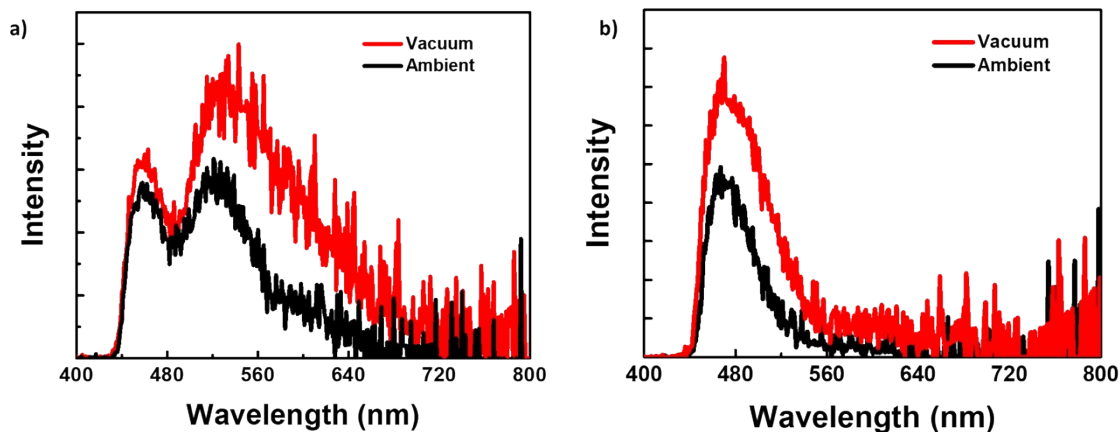

**Figure S30.** (a) Time-gated PL spectra (50  $\mu$ s delay) at  $\lambda_{\text{ex}} = 380$  nm for (a) **1** and (b) **2** (as prepared crystals) at 298K under vacuum (absence of oxygen) and ambient conditions (presence of oxygen).

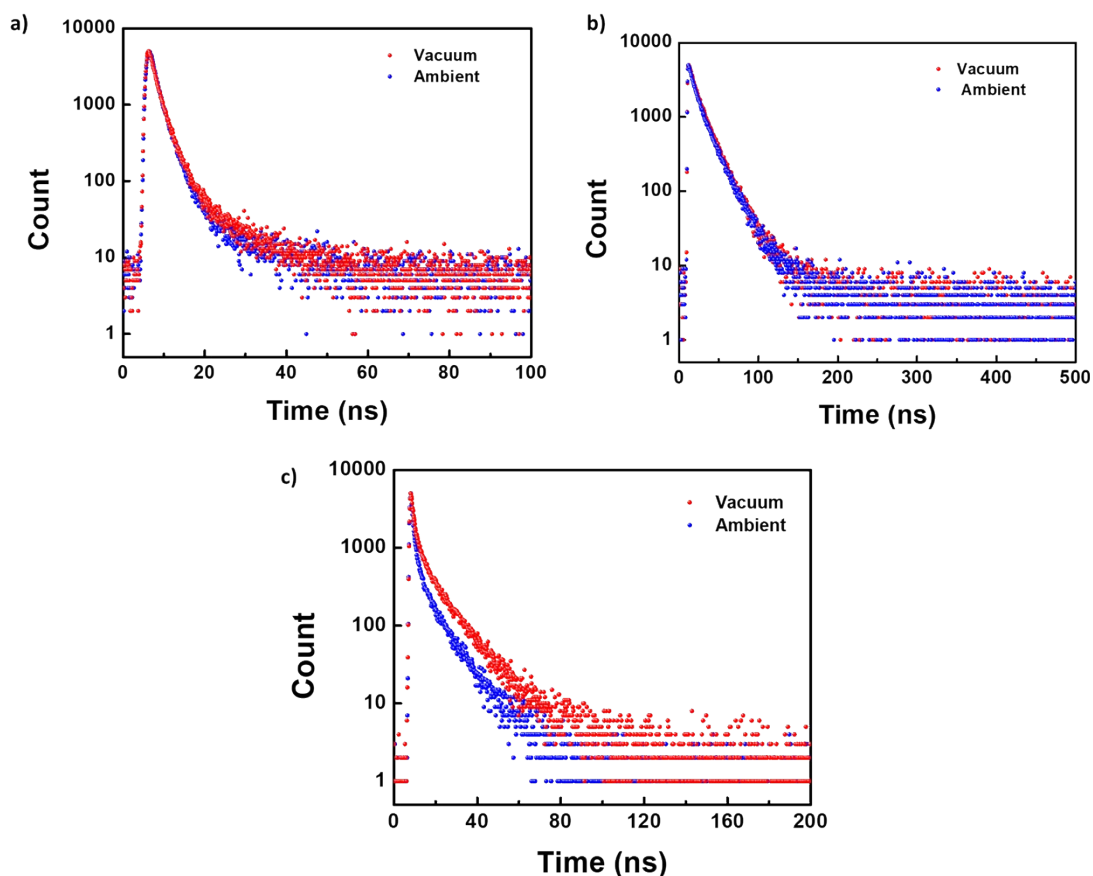

**Figure S31.** Fluorescence lifetime decay at  $\lambda_{\text{ex}} = 375$  nm for **1** (a)  $\lambda_{\text{em}} = 460$  nm (b)  $\lambda_{\text{em}} = 520$  nm (c) fluorescence lifetime decay for **2** at  $\lambda_{\text{ex}} = 375$  nm,  $\lambda_{\text{em}} = 475$  nm] (as prepared solid) at 298K under vacuum (absence of oxygen) and ambient conditions (presence of oxygen).

## Supplementary information

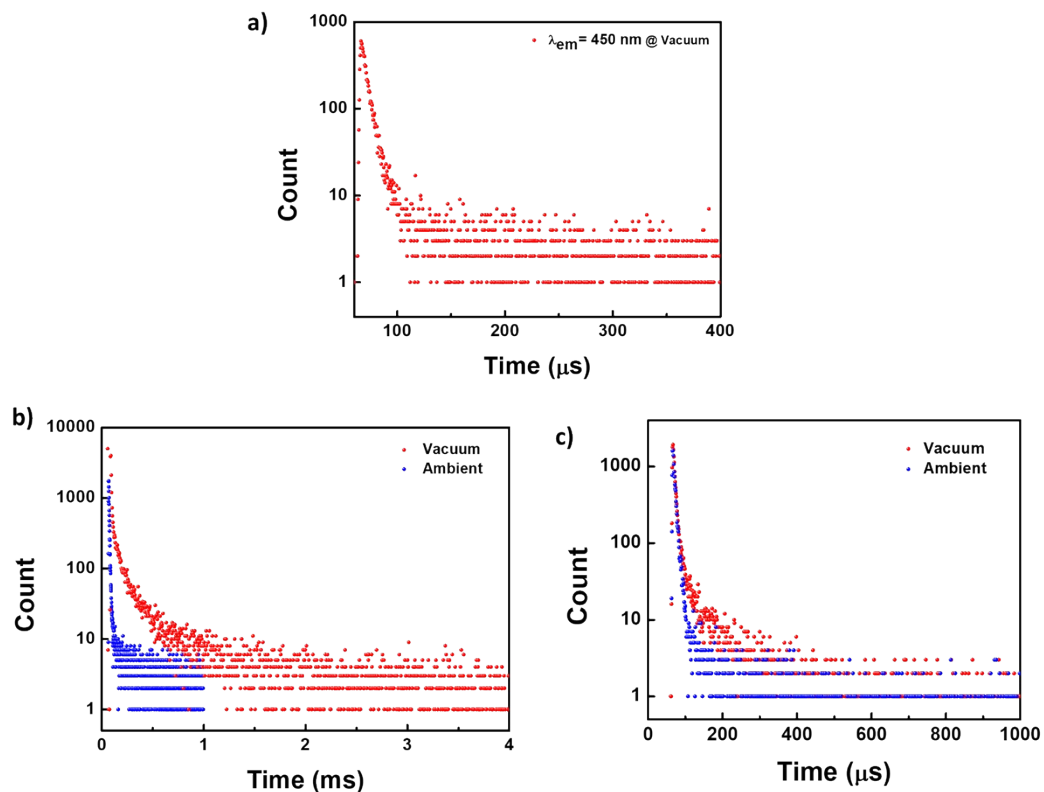

**Figure S32.** Delayed fluorescence lifetime decay for **1** (a)  $\lambda_{\text{ex}} = 300 \text{ nm}$ ,  $\lambda_{\text{em}} = 460 \text{ nm}$  at 298 K under vacuum (b)  $\lambda_{\text{ex}} = 300 \text{ nm}$ ,  $\lambda_{\text{em}} = 520 \text{ nm}$  at 298K under vacuum (absence of oxygen) and ambient conditions (presence of oxygen) (c) delayed fluorescence lifetime decay for **2** [ $\lambda_{\text{ex}} = 300 \text{ nm}$ ,  $\lambda_{\text{em}} = 475 \text{ nm}$ ] (as prepared crystals) at 298K under vacuum (absence of oxygen) and ambient conditions (presence of oxygen).

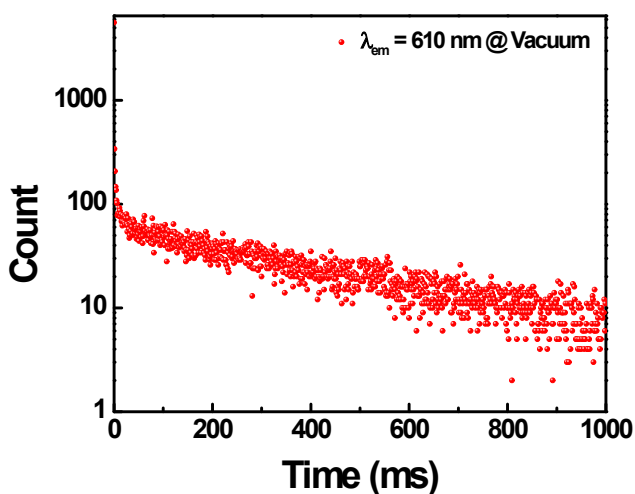

**Figure S33.** Phosphorescence decay for **2** [ $\lambda_{\text{ex}} = 300 \text{ nm}$ ,  $\lambda_{\text{em}} = 610 \text{ nm}$ ], at 298K under vacuum (absence of oxygen) and ambient conditions.



## Supplementary information

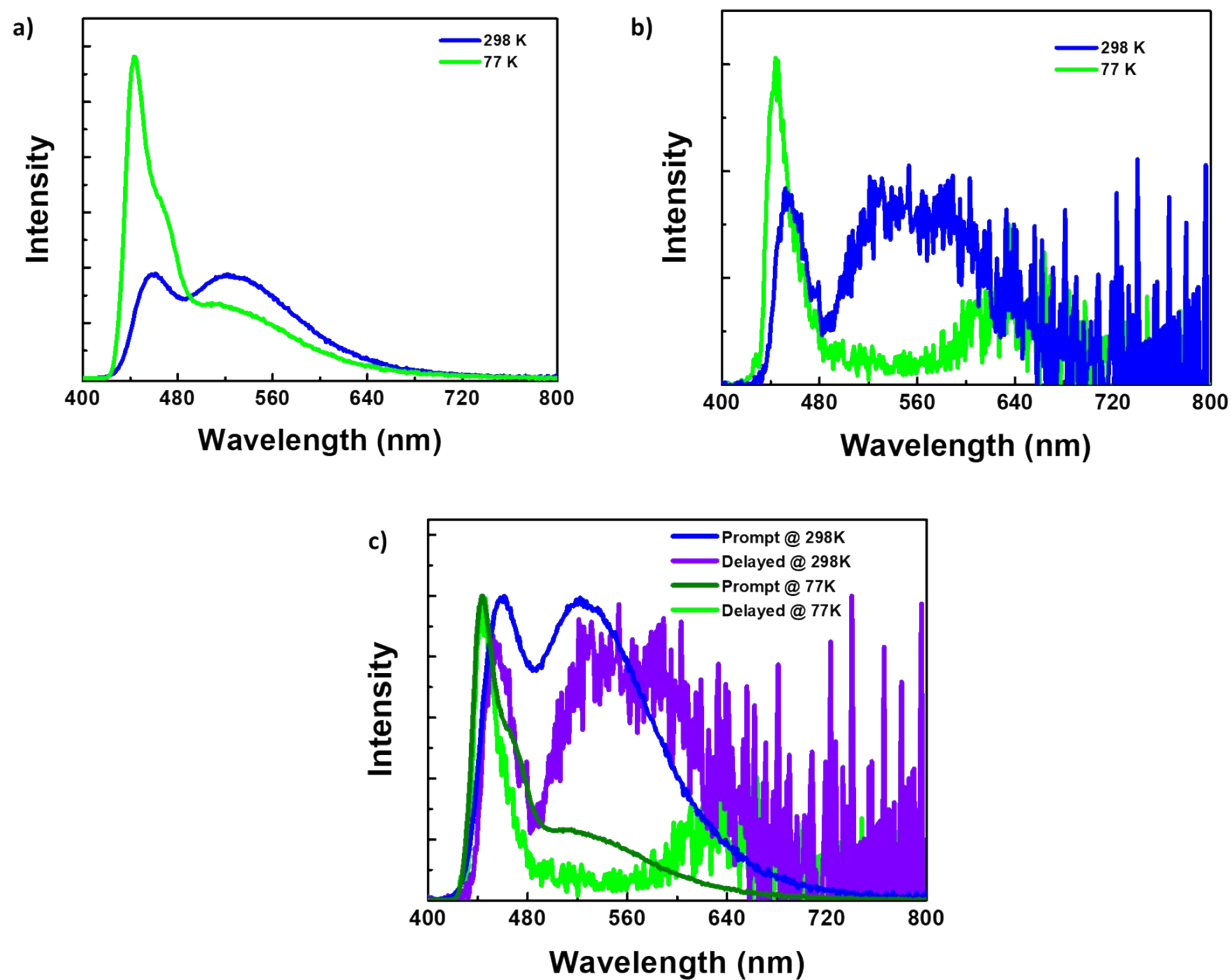

**Figure S34.** (a) Fluorescence spectra (b) time-gated spectra [50  $\mu\text{s}$  delay] (c) normalized fluorescence and delayed spectra [50  $\mu\text{s}$  delay] under vacuum atmosphere at 298 K and 77 K for **1** upon  $\lambda_{\text{ex}} = 380$  nm.

## Supplementary information

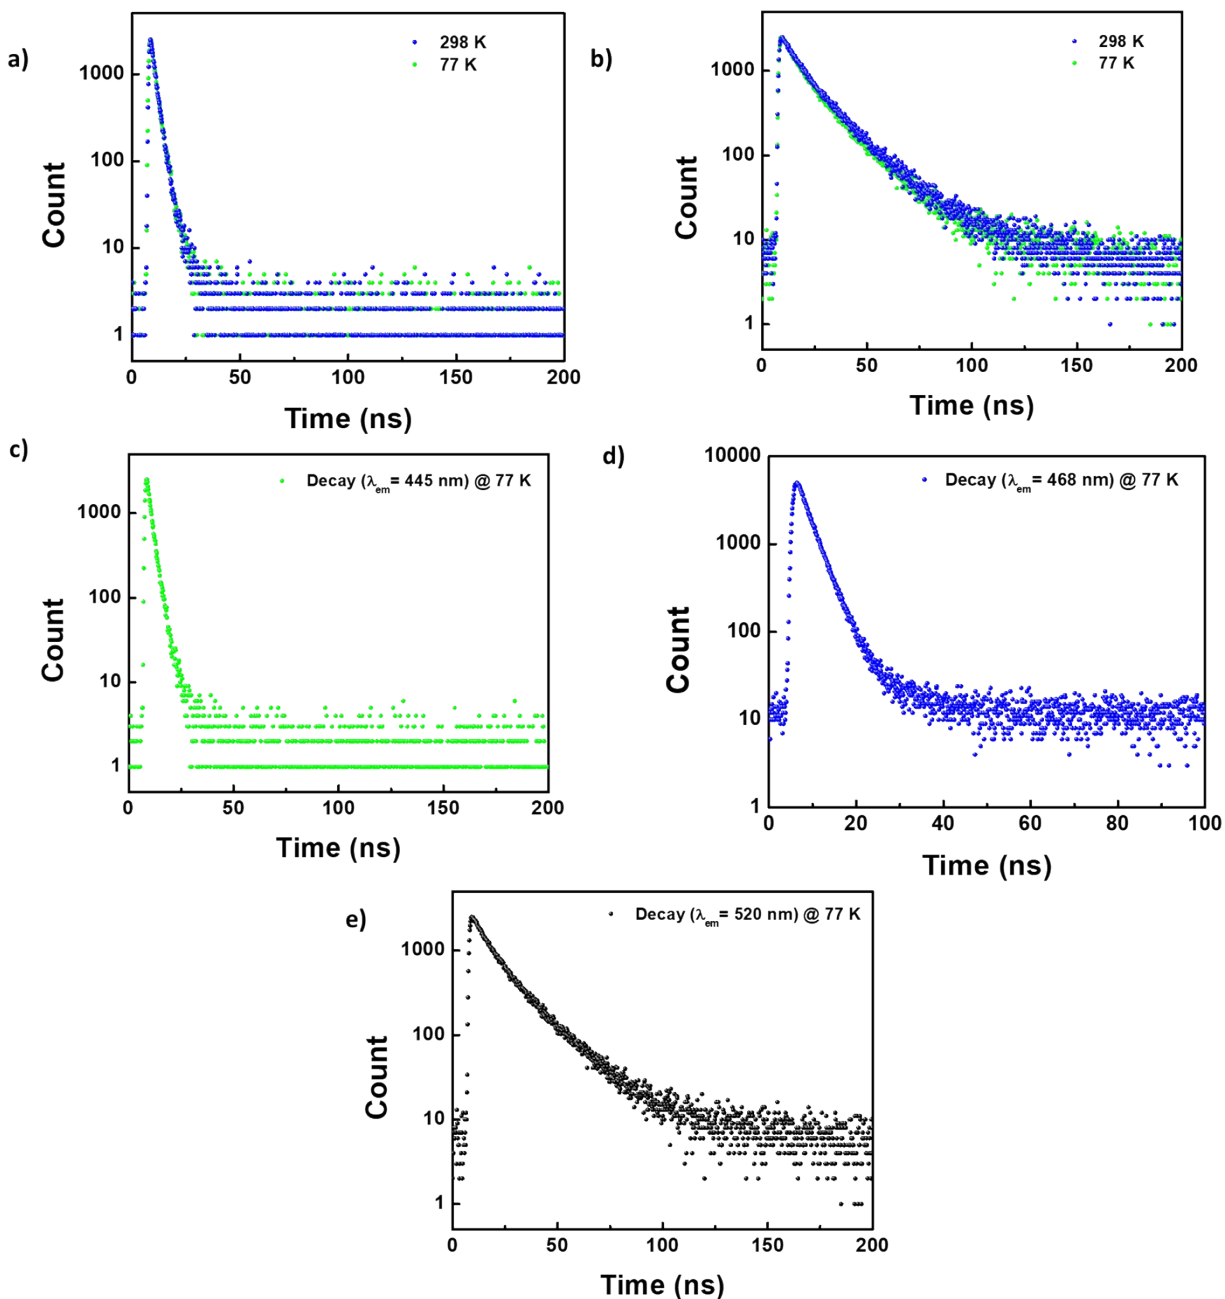

**Figure S35.** (a, b) Fluorescence lifetime decay under vacuum at 298 K and 77 K for **1** upon  $\lambda_{ex} = 375$  nm,  $\lambda_{em} = 450$  nm, and  $\lambda_{em} = 520$  nm respectively. (c,d,e) fluorescence lifetime decay under vacuum at 77 K for **1** upon  $\lambda_{ex} = 375$  nm,  $\lambda_{em} = 445$  nm,  $\lambda_{em} = 468$  nm, and  $\lambda_{em} = 520$  nm respectively.

## Supplementary information

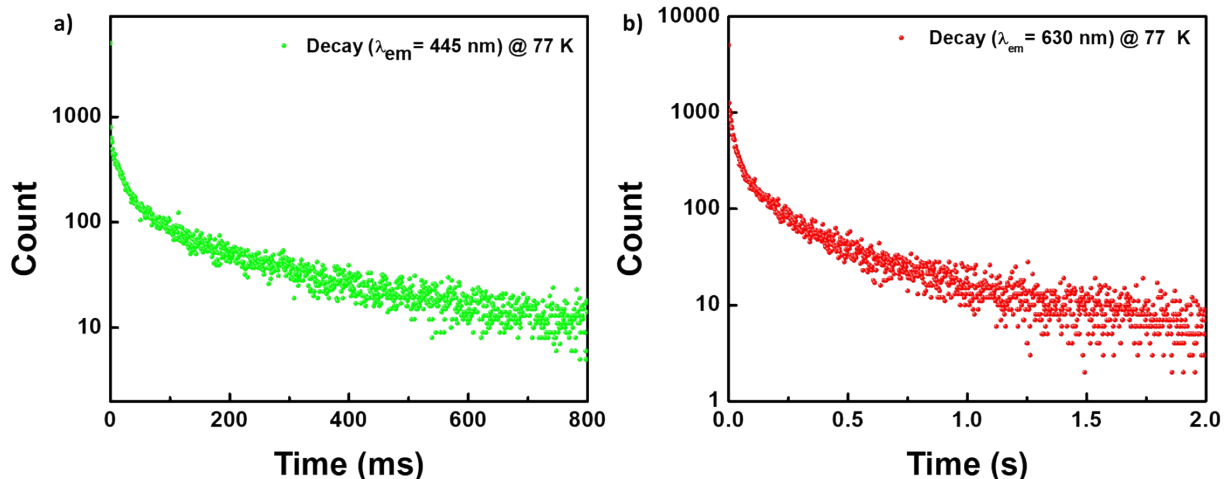

**Figure S36.** (a) Delayed Fluorescence decay [ $\lambda_{em} = 445$  nm] (b) phosphorescence [ $\lambda_{em} = 620$ ] decay under vacuum at 77 K for **1** upon  $\lambda_{ex} = 300$  nm.

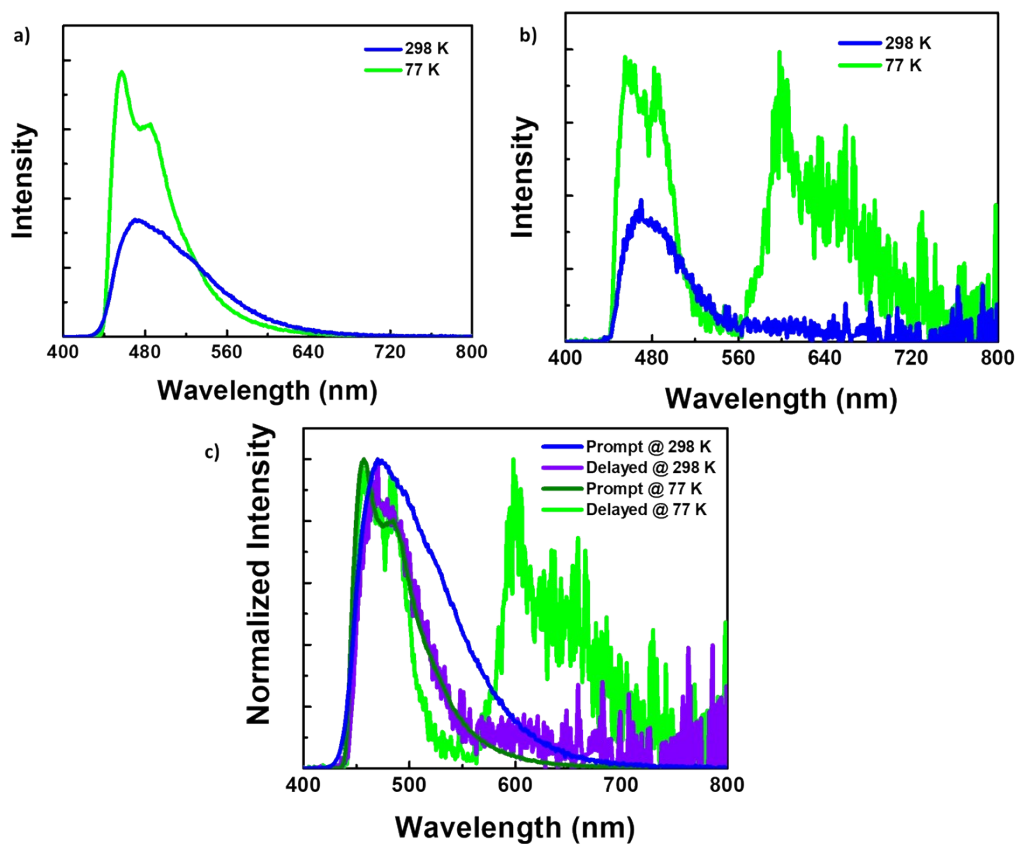

**Figure S37.** (a) Fluorescence spectra (b) time-gated spectra [50  $\mu$ s delay] (c) normalized fluorescence and delayed spectra [50  $\mu$ s delay] under vacuum atmosphere at 298 K and 77 K for **2** upon  $\lambda_{ex} = 380$  nm.

## Supplementary information

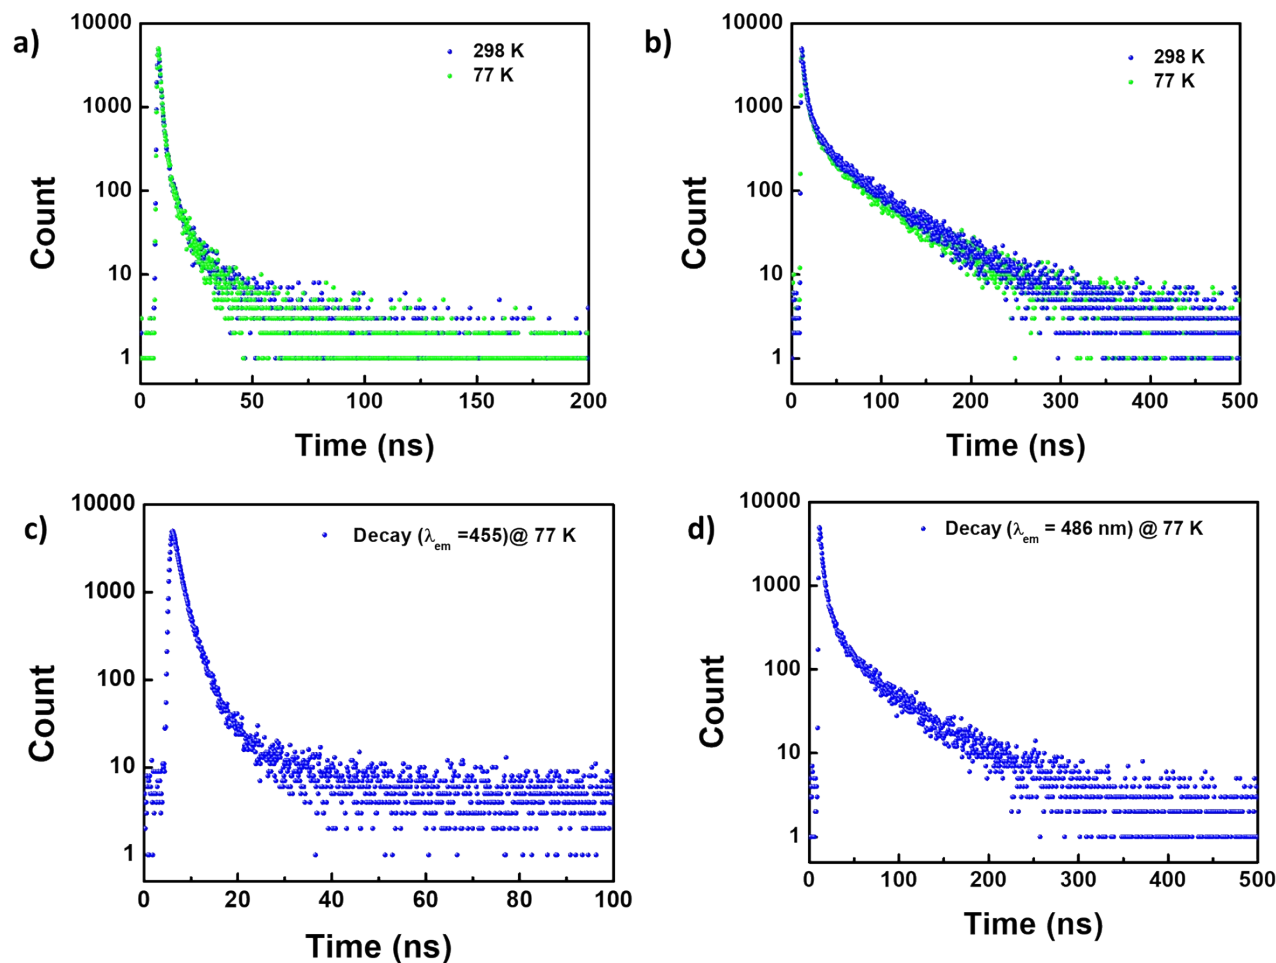

**Figure S38.** (a, b) Fluorescence lifetime decay under vacuum at 298 K and 77 K for **2** upon  $\lambda_{ex} = 375$  nm,  $\lambda_{em} = 475$  nm, and  $\lambda_{em} = 520$  nm respectively. (c,d) fluorescence lifetime decay under vacuum at 77 K for **2** upon  $\lambda_{ex} = 375$  nm,  $\lambda_{em} = 455$  nm, and  $\lambda_{em} = 486$  nm, respectively.

## Supplementary information

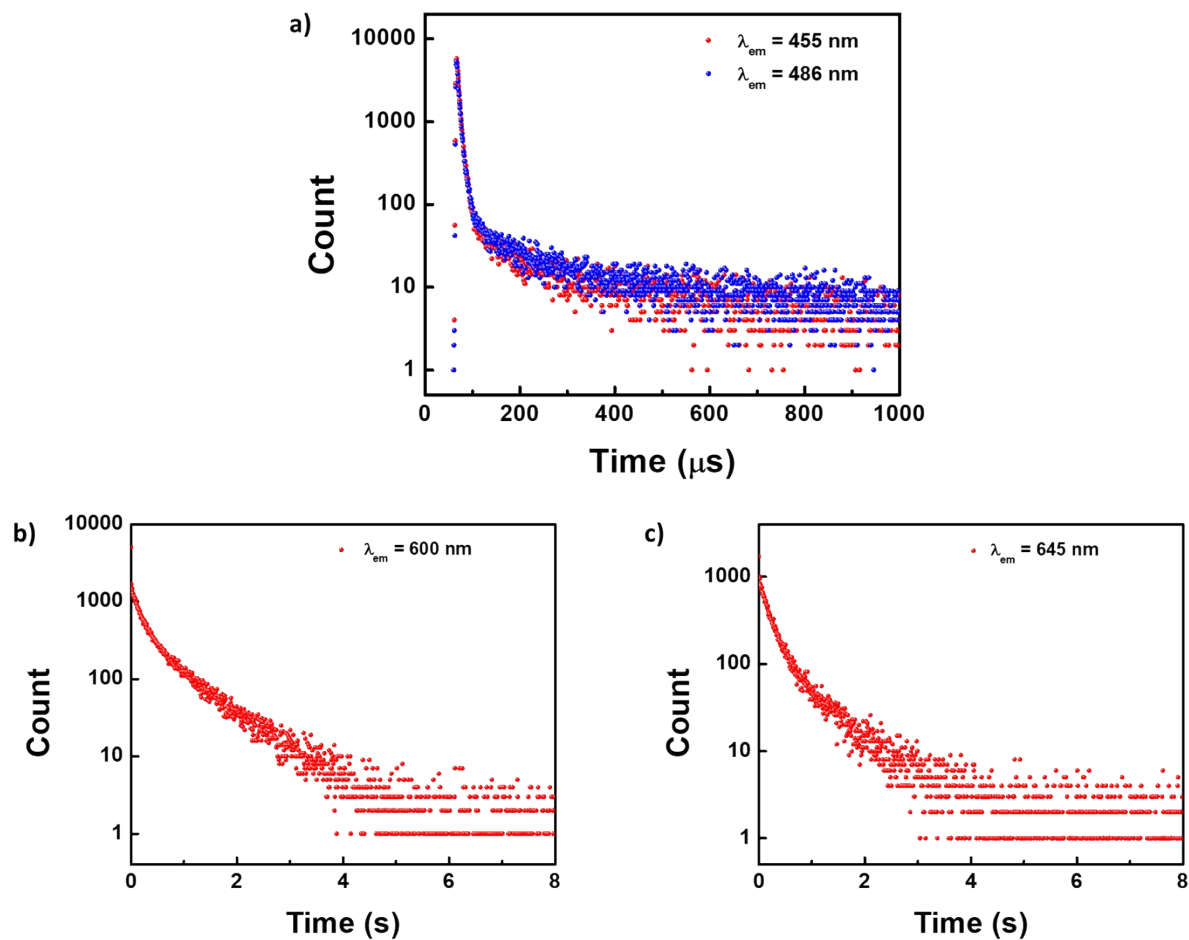

**Figure S39.** (a) Delayed Fluorescence decay at [ $\lambda_{\text{em}} = 455 \text{ nm}$  and  $486 \text{ nm}$ ] (b,c) phosphorescence decay [ $\lambda_{\text{em}} = 600 \text{ nm}$  and  $645 \text{ nm}$ ] under vacuum at  $77 \text{ K}$  for **2** upon  $\lambda_{\text{ex}} = 300 \text{ nm}$ .

## Supplementary information

**Table S8:** Fluorescence lifetime for **1** and **2** under different atmospheric conditions and different temperatures along with total PLQY under ambient conditions at 298 K.

|              | Fluorescence lifetime (ns) |                     |                                  |                                  |                     |                     |                                  |                                  |                     |                     |                                  |                                  | PLQY [%] |
|--------------|----------------------------|---------------------|----------------------------------|----------------------------------|---------------------|---------------------|----------------------------------|----------------------------------|---------------------|---------------------|----------------------------------|----------------------------------|----------|
|              | 77 K (Vacuum)              |                     |                                  |                                  | 298 K (Vacuum)      |                     |                                  |                                  | 298 K (Ambient)     |                     |                                  |                                  |          |
|              | $\lambda_{ex}$ (nm)        | $\lambda_{em}$ (nm) | $\tau_1$ (A <sub>1</sub> %) (ns) | $\tau_2$ (A <sub>2</sub> %) (ns) | $\lambda_{ex}$ (nm) | $\lambda_{em}$ (nm) | $\tau_1$ (A <sub>1</sub> %) (ns) | $\tau_2$ (A <sub>2</sub> %) (ns) | $\lambda_{ex}$ (nm) | $\lambda_{em}$ (nm) | $\tau_1$ (A <sub>1</sub> %) (ns) | $\tau_2$ (A <sub>2</sub> %) (ns) |          |
| <b>1</b>     |                            |                     |                                  |                                  |                     |                     |                                  |                                  |                     |                     |                                  |                                  |          |
| <b>Solid</b> | 375                        | 445                 | 2.52 (100)                       | -                                | -                   | -                   | -                                | -                                | -                   | -                   | -                                | -                                | 39.2     |
|              | 375                        | 450                 | 2.45 (100)                       | -                                | 375                 | 450                 | 2.03 (83.95)                     | 9.14 (16.05)                     | 375                 | 450                 | 2.09 (83.99)                     | 10.01 (16.01)                    |          |
|              | 375                        | 468                 | 3.08 (95.28)                     | 11.02 (4.72)                     | -                   | -                   | -                                | -                                | -                   | -                   | -                                | -                                |          |
|              | 375                        | 520                 | 7.74 (42.13)                     | 19.74 (57.87)                    | 375                 | 520                 | 10.02 (45.12)                    | 21.95 (54.88)                    | 375                 | 520                 | 9.39 (44.63)                     | 21.91 (55.37)                    |          |
| <b>2</b>     |                            |                     |                                  |                                  |                     |                     |                                  |                                  |                     |                     |                                  |                                  |          |
| <b>Solid</b> | 375                        | 455                 | 1.51 (74.86)                     | 5.43 (25.14)                     | -                   | -                   | -                                | -                                | -                   | -                   | -                                | -                                | 56.2     |
|              | -                          | -                   | -                                | -                                | 375                 | 470                 | 2.69 (29.89)                     | 12.90 (70.11)                    | 375                 | 470                 | 1.19 (54.25)                     | 9.76 (45.75)                     |          |
|              | 375                        | 486                 | 7.16 (35.99)                     | 52.64 (64.01)                    | 375                 | -                   | -                                | -                                | -                   | -                   | -                                | -                                |          |
|              | 375                        | 520 (br Tail)       | 8.14 (36.66)                     | 53.67 (63.34)                    | 375                 | 520                 | 6.48 (45.83)                     | 18.72 (54.17)                    | 375                 | 520                 | 5.40 (43.05)                     | 16.28 (56.95)                    |          |

**Table S9:** Delayed fluorescence and phosphorescence lifetime

for **1** and **2** under different atmospheric conditions.

|  | Delayed fluorescence ( $\mu$ s)/Phosphorescence lifetime (ms) |                |                 |
|--|---------------------------------------------------------------|----------------|-----------------|
|  | 77 K (Vacuum)                                                 | 298 K (Vacuum) | 298 K (Ambient) |
|  |                                                               |                |                 |

### Supplementary information

|              | $\lambda_{\text{ex}}$<br>(nm) | $\lambda_{\text{em}}$<br>(nm) | $\tau_1$ (A <sub>1</sub> %)    | $\tau_2$ (A <sub>2</sub> %)     | $\lambda_{\text{ex}}$<br>(nm) | $\lambda_{\text{em}}$<br>(nm) | $\tau_1$ (A <sub>1</sub> %)    | $\tau_2$ (A <sub>2</sub> %)     | $\lambda_{\text{ex}}$<br>(nm) | $\lambda_{\text{em}}$<br>(nm) | $\tau_1$ (A <sub>1</sub> %)   | $\tau_2$ (A <sub>2</sub> %)    |
|--------------|-------------------------------|-------------------------------|--------------------------------|---------------------------------|-------------------------------|-------------------------------|--------------------------------|---------------------------------|-------------------------------|-------------------------------|-------------------------------|--------------------------------|
| <b>1</b>     |                               |                               |                                |                                 |                               |                               |                                |                                 |                               |                               |                               |                                |
| <b>Solid</b> | 300                           | 445                           | 21.73 $\mu\text{s}$<br>(25.12) | 202.98 $\mu\text{s}$<br>(74.88) | -                             | -                             | -                              | -                               | -                             | -                             | -                             | -                              |
|              | -                             | -                             | -                              | -                               | 300                           | 450                           | 6.09 $\mu\text{s}$<br>(93.24)  | 53.92 $\mu\text{s}$<br>(6.76)   | -                             | -                             | -                             | -                              |
|              | -                             | -                             | -                              | -                               | 300                           | 520                           | 64.44 $\mu\text{s}$<br>(52.87) | 365.87 $\mu\text{s}$<br>(47.13) | 300                           | 520                           | 5.63 $\mu\text{s}$<br>(87.57) | 91.99 $\mu\text{s}$<br>(12.43) |
|              | 300                           | 620                           | 35.50 ms<br>(27.74)            | 323.45 ms<br>(72.26)            | -                             | -                             | -                              | -                               | -                             | -                             | -                             | -                              |
| <b>2</b>     |                               |                               |                                |                                 |                               |                               |                                |                                 |                               |                               |                               |                                |
| <b>Solid</b> | 300                           | 455                           | 6.09 $\mu\text{s}$<br>(76.62)  | 125.26 $\mu\text{s}$<br>(23.28) | -                             | -                             | -                              | -                               | -                             | -                             | -                             | -                              |
|              | 300                           | 486                           | 6.03 $\mu\text{s}$<br>(72.71)  | 125.10 $\mu\text{s}$<br>(27.29) | 300                           | 470                           | 5.43 $\mu\text{s}$<br>(71.49)  | 47.41 $\mu\text{s}$<br>(28.51)  | 300                           | 450                           | 5.93 $\mu\text{s}$<br>(100)   | -                              |
|              | 300                           | 600                           | 172.67 ms<br>(35.95)           | 840.03 ms<br>(64.05)            |                               |                               |                                |                                 | -                             | -                             | -                             | -                              |
|              | 300                           | 645                           | 182.94 ms<br>(49.59)           | 783.21 ms<br>(50.41)            | 300                           | 610                           | 2.72 ms<br>(3.92)              | 378.19 ms<br>(96.08)            | -                             | -                             | -                             | -                              |

## Supplementary information

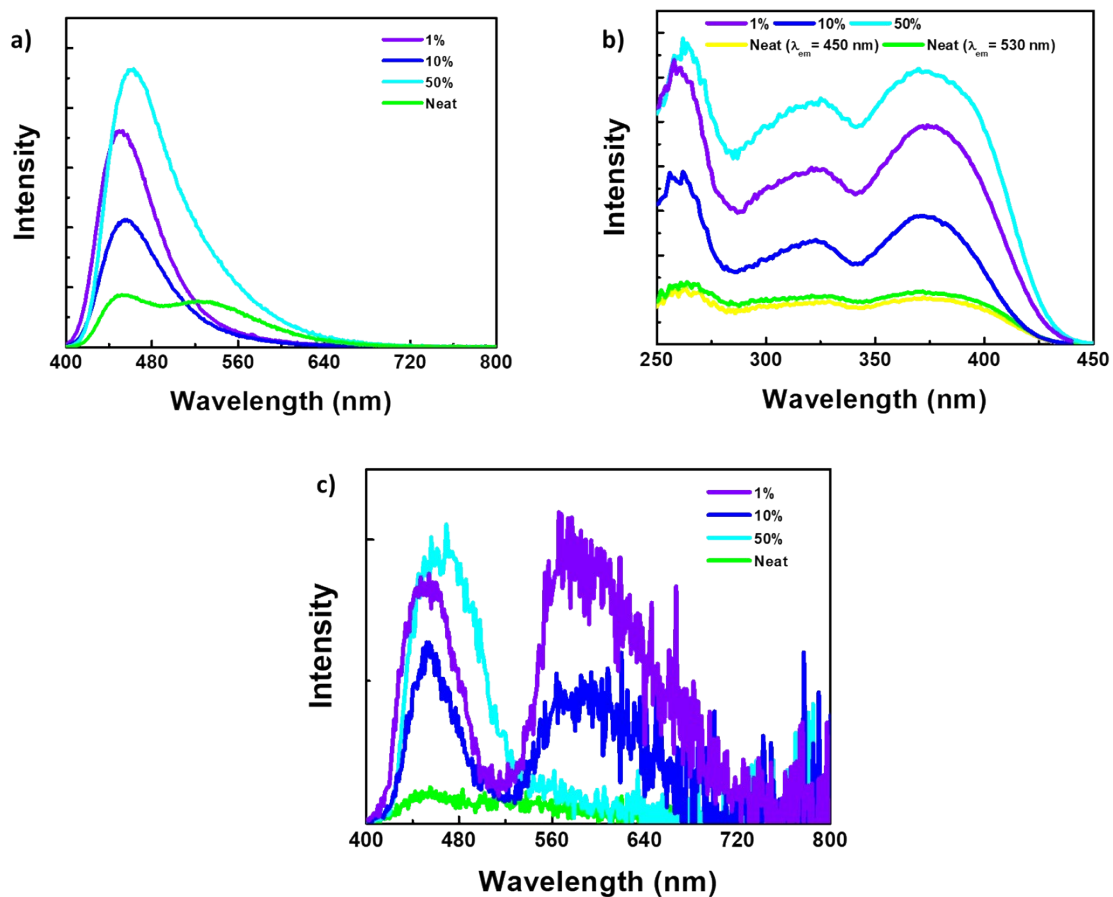

**Figure S40.** (a) Fluorescence spectra (b) excitation spectra corresponding to emission maxima (c) delayed fluorescence spectra [50  $\mu$ s delay] under vacuum atmosphere at 298 K for **1** as neat film and doped film on PMMA matrix ( $\lambda_{ex} = 380$  nm).



## Supplementary information

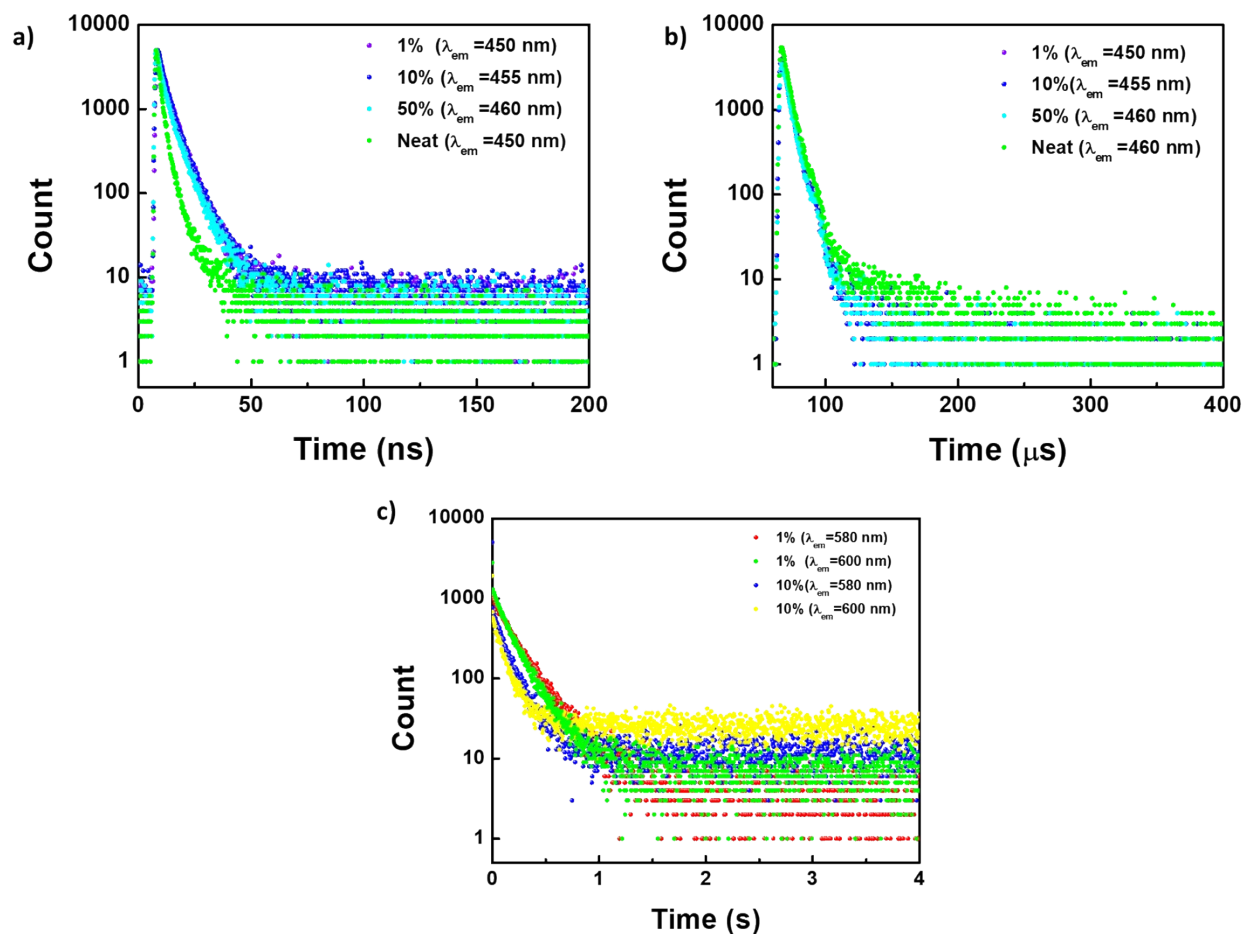

**Figure S41.** (a) Fluorescence lifetime decay at  $\lambda_{ex} = 375$  nm (b) delayed fluorescence lifetime decay at  $\lambda_{ex} = 375$  nm for **1** as neat film and doped film on PMMA matrix at different wt% .(c) phosphorescence lifetime decay for **1** as doped film on PMMA matrix (1 wt%, 10 wt%) at  $\lambda_{ex} = 380$  nm.

## Supplementary information

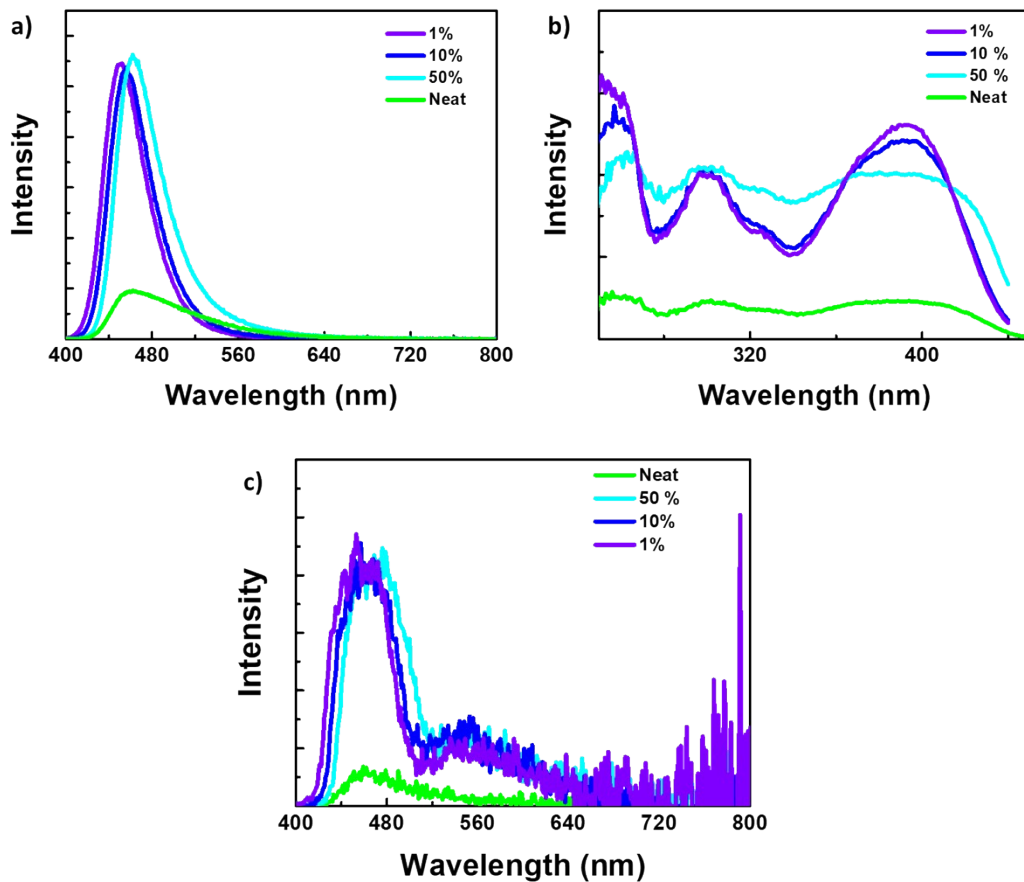

**Figure S42.** (a) Fluorescence spectra for **2** as doped film on PMMA matrix ( $\lambda_{ex} = 380$  nm) (b) excitation spectra corresponding to emission maxima, (c) delayed fluorescence spectra [50  $\mu$ s delay] under vacuum atmosphere at 298 K for **2** as neat film and doped film on PMMA matrix ( $\lambda_{ex} = 380$  nm).

## Supplementary information

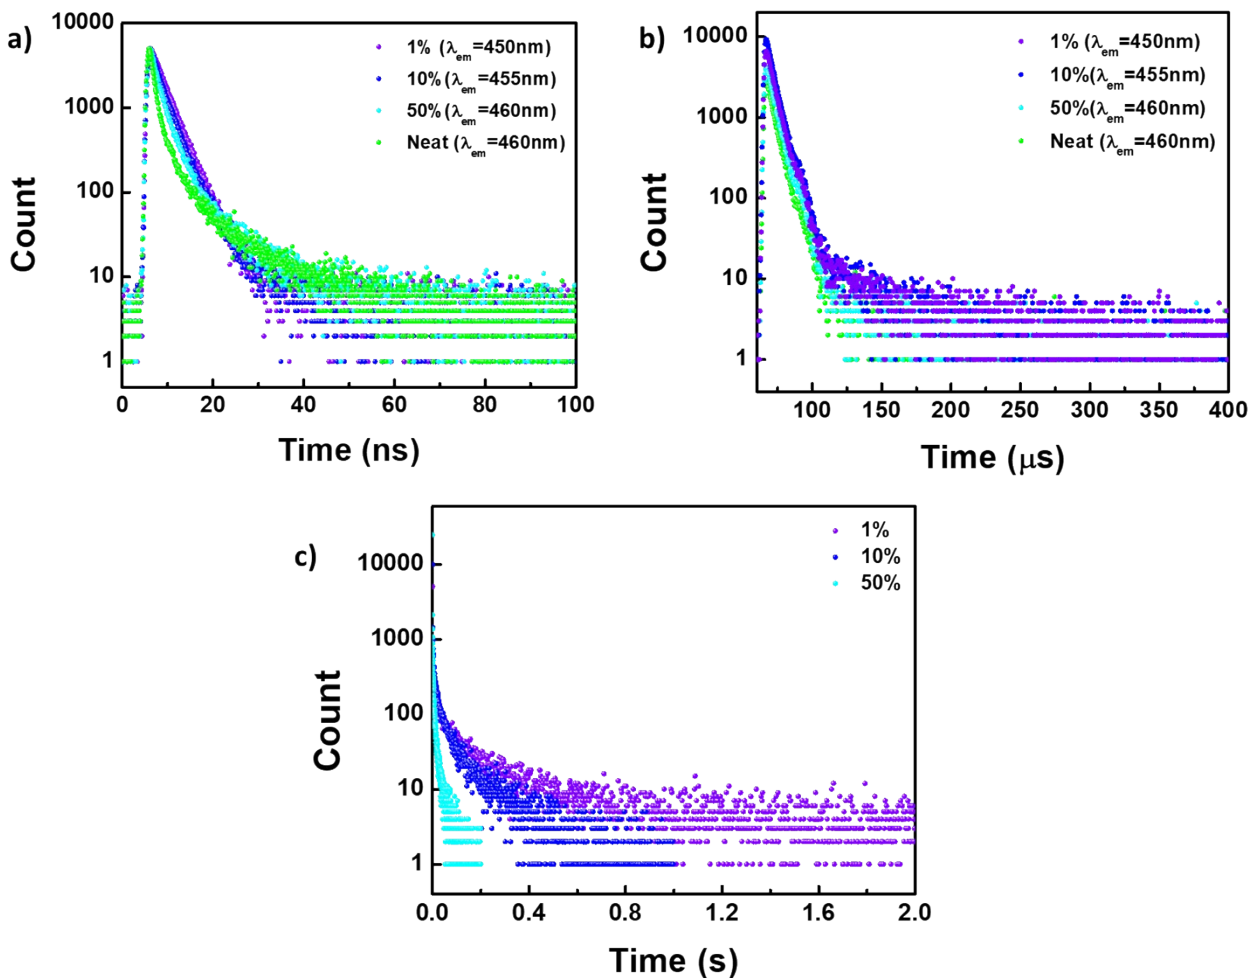

**Figure S43.** (a) Fluorescence lifetime decay at  $\lambda_{ex} = 375$  nm (b) delayed fluorescence lifetime decay at  $\lambda_{ex} = 375$  nm for **2** as neat film and doped film on PMMA matrix at different wt%. (c) phosphorescence lifetime decay for **2** as doped film on PMMA matrix (1 wt%, 10 wt%, and 50 wt%) under vacuum atmosphere at 298 K upon  $\lambda_{ex} = 380$  nm,  $\lambda_{em} = 540$  nm.

## Supplementary information

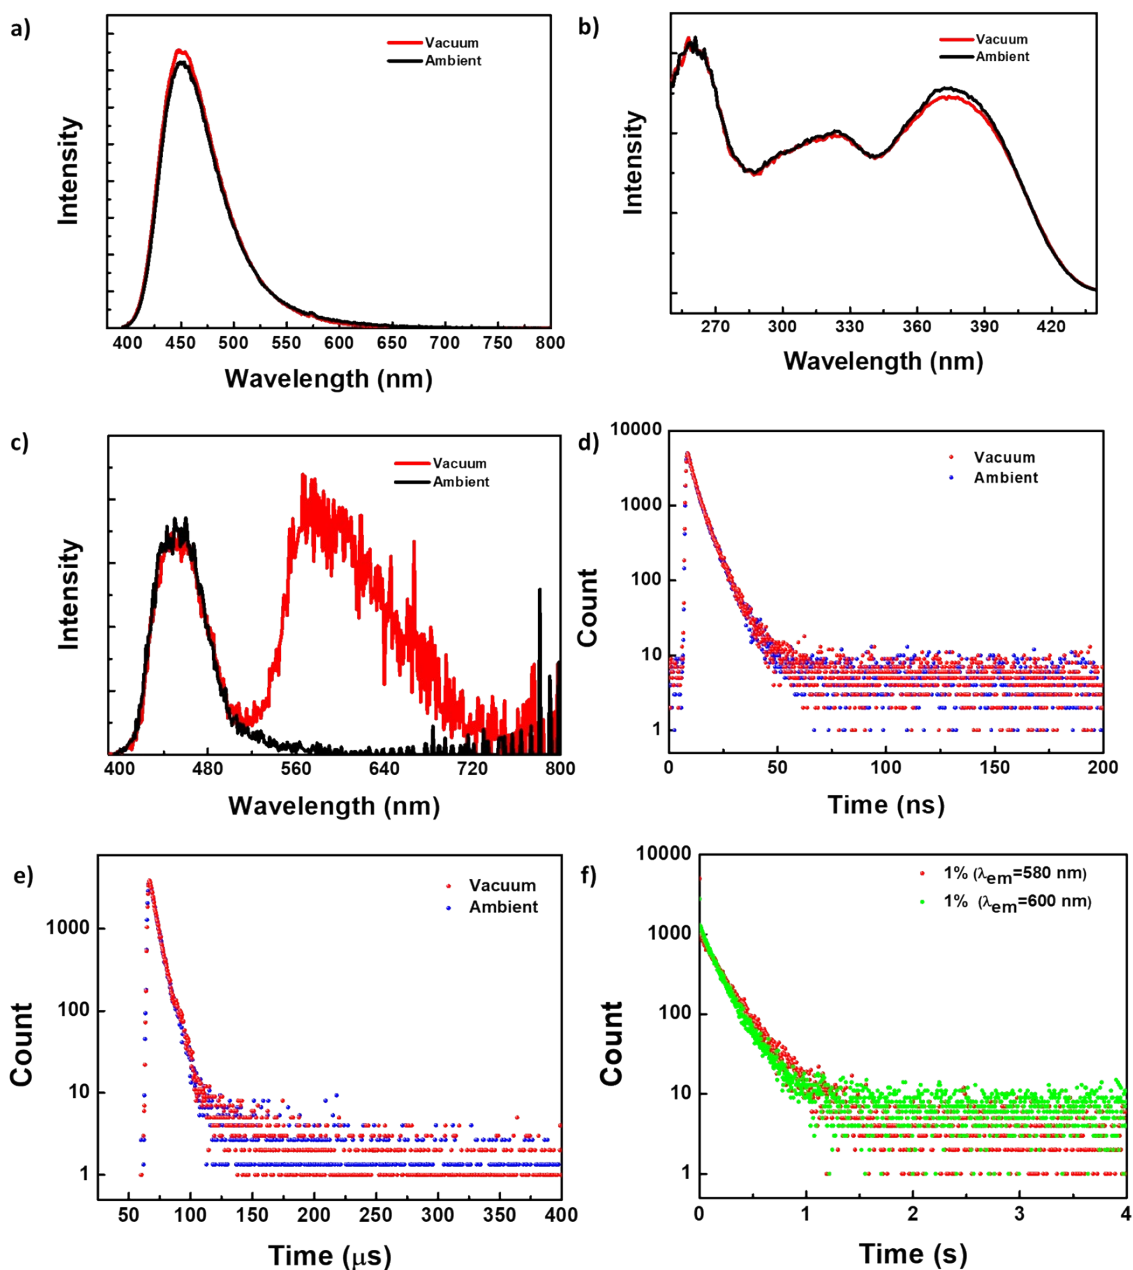

**Figure S44.** (a) Fluorescence spectra (b) excitation spectra corresponding to emission maxima (c) delayed fluorescence spectra [50  $\mu$ s delay] (d) fluorescence lifetime decay [ $\lambda_{ex} = 375$  nm and  $\lambda_{ex} = 450$  nm], (e) delayed fluorescence lifetime decay [ $\lambda_{ex} = 380$  nm and  $\lambda_{ex} = 450$  nm] and phosphorescence lifetime decay [ $\lambda_{ex} = 375$  nm and  $\lambda_{ex} = 580$  nm, 600 nm] under vacuum [absence of oxygen] and ambient atmosphere [presence of oxygen] at 298 K for **1** doped in PMMA matrix (1 wt%) [ $\lambda_{ex} = 380$  nm].

## Supplementary information

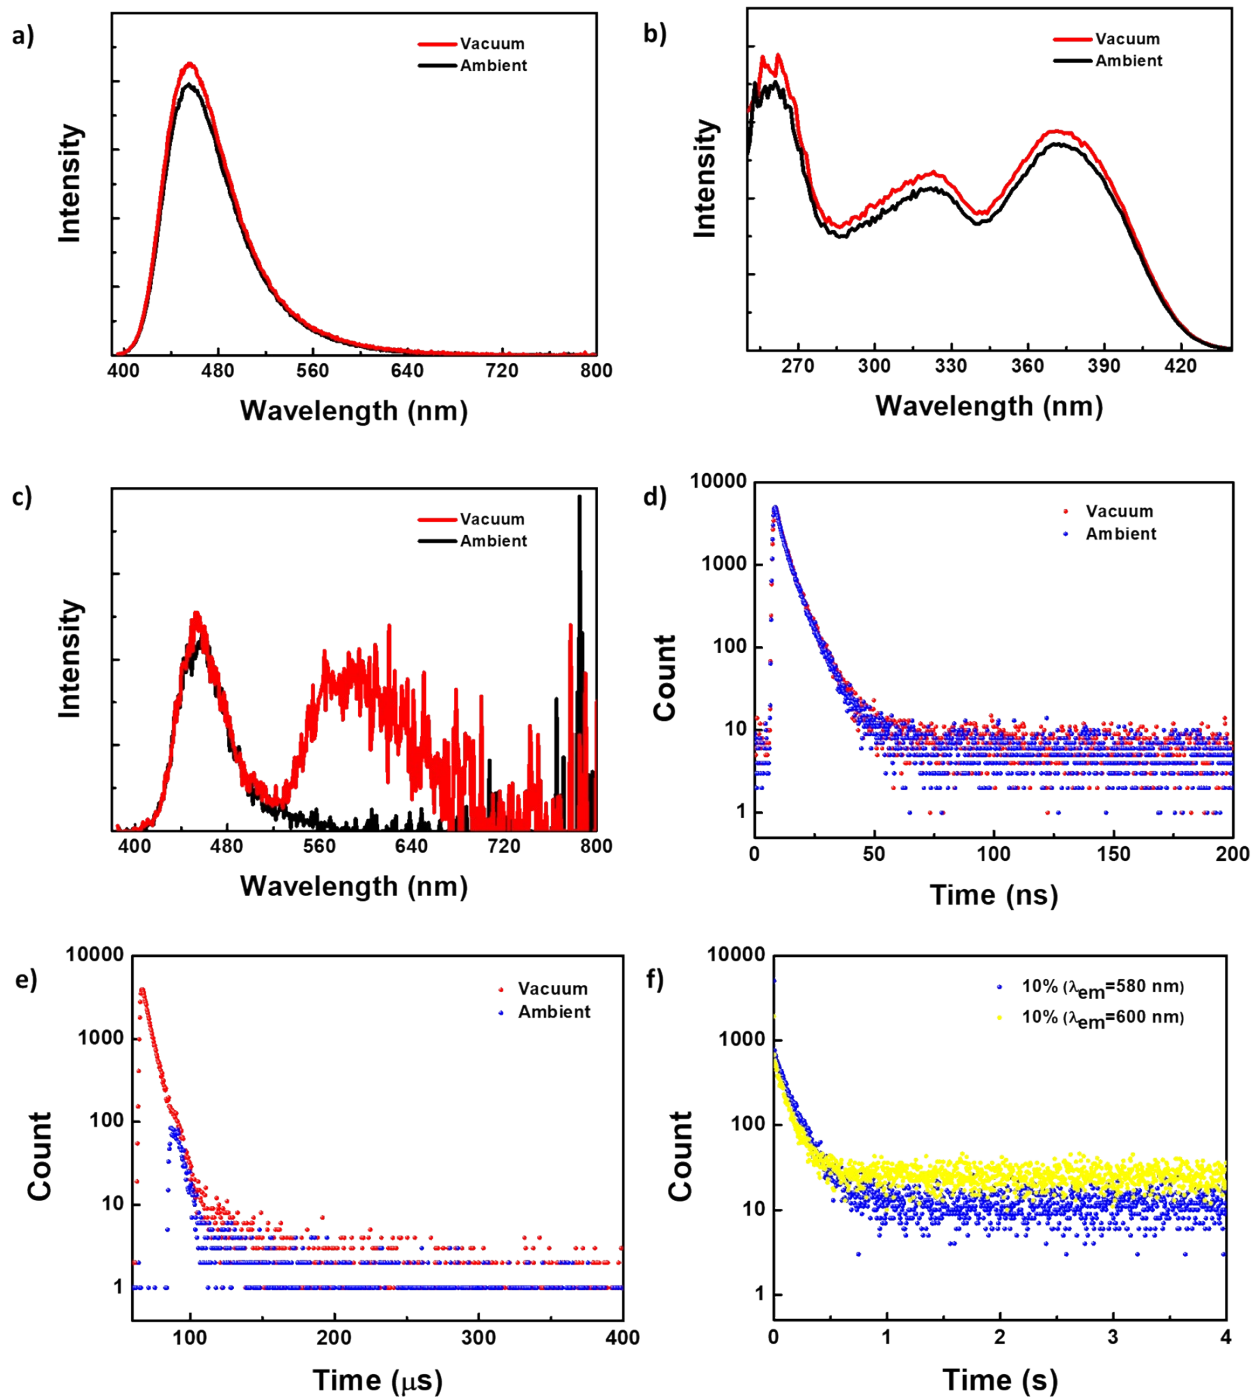

**Figure S45.** (a) Fluorescence spectra (b) excitation spectra corresponding to emission maxima (c) delayed fluorescence spectra [50  $\mu$ s delay] (d) fluorescence lifetime decay [ $\lambda_{ex} = 375$  nm and  $\lambda_{ex} = 455$  nm] (e) delayed fluorescence lifetime decay [ $\lambda_{ex} = 380$  nm and  $\lambda_{ex} = 455$  nm] and (f) phosphorescence lifetime decay [ $\lambda_{ex} = 375$  nm and  $\lambda_{ex} = 580$  nm, 600 nm] under vacuum [absence of oxygen] and ambient atmosphere [presence of oxygen] at 298 K for **1** doped in PMMA matrix (10 wt%) [ $\lambda_{ex} = 380$  nm].

## Supplementary information

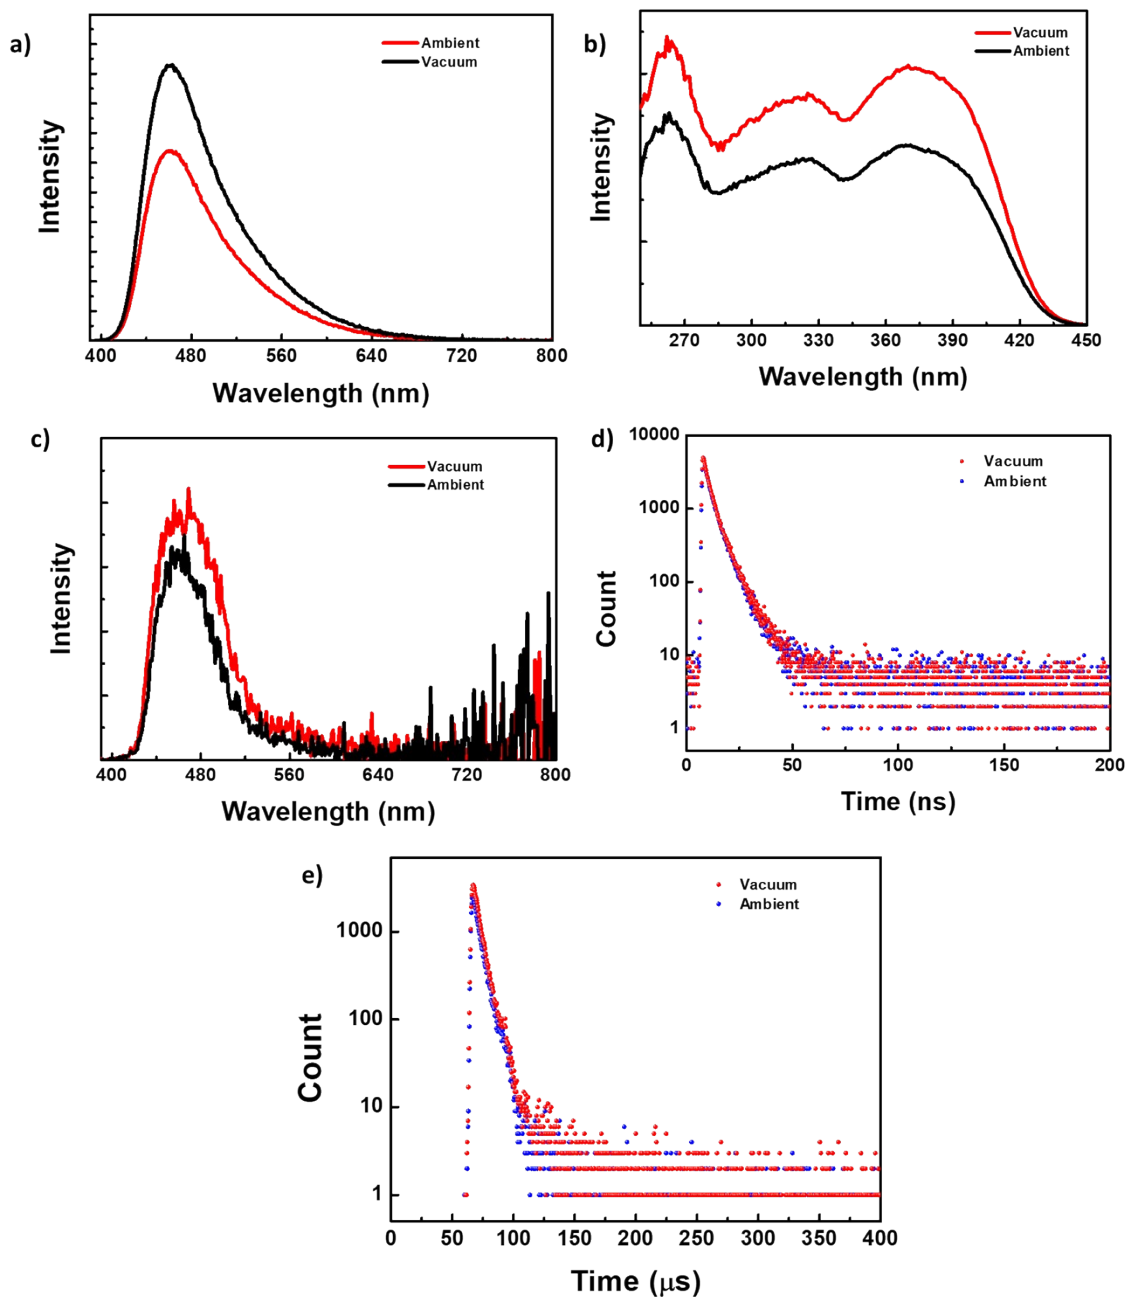

**Figure S46.** (a) Fluorescence spectra (b) excitation spectra corresponding to emission maxima (c) delayed fluorescence spectra [50  $\mu$ s delay] (d) fluorescence lifetime decay [ $\lambda_{ex} = 375$  nm and  $\lambda_{ex} = 460$  nm] (e) delayed fluorescence lifetime decay [ $\lambda_{ex} = 380$  nm and  $\lambda_{ex} = 460$  nm] under vacuum [absence of oxygen] and ambient atmosphere [presence of oxygen] at 298 K for **1** doped in PMMA matrix (50 wt%) [ $\lambda_{ex} = 380$  nm].

## Supplementary information

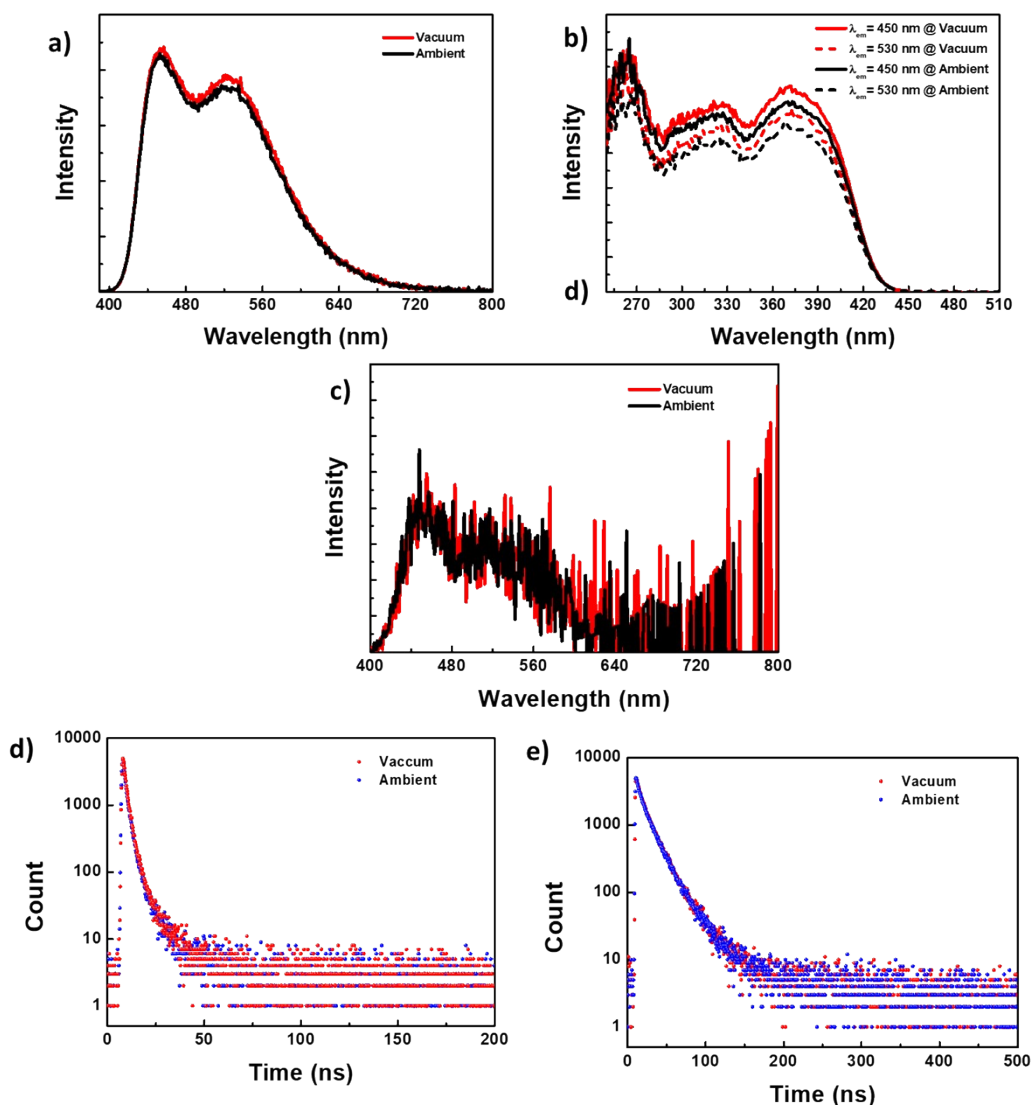

**Figure S47.** (a) Fluorescence spectra (b) excitation spectra corresponding to emission maxima, (c) delayed fluorescence spectra [50  $\mu$ s delay] (d) fluorescence lifetime decay [ $\lambda_{\text{ex}} = 375$  nm and  $\lambda_{\text{ex}} = 460$  nm] (e) fluorescence lifetime decay [ $\lambda_{\text{ex}} = 375$  nm and  $\lambda_{\text{ex}} = 530$  nm] under vacuum [absence of oxygen] and ambient atmosphere [presence of oxygen] at 298 K for **1** as neat film [ $\lambda_{\text{ex}} = 380$  nm]. Delayed fluorescence emission is weak in neat film, so we could not record the lifetime.

## Supplementary information

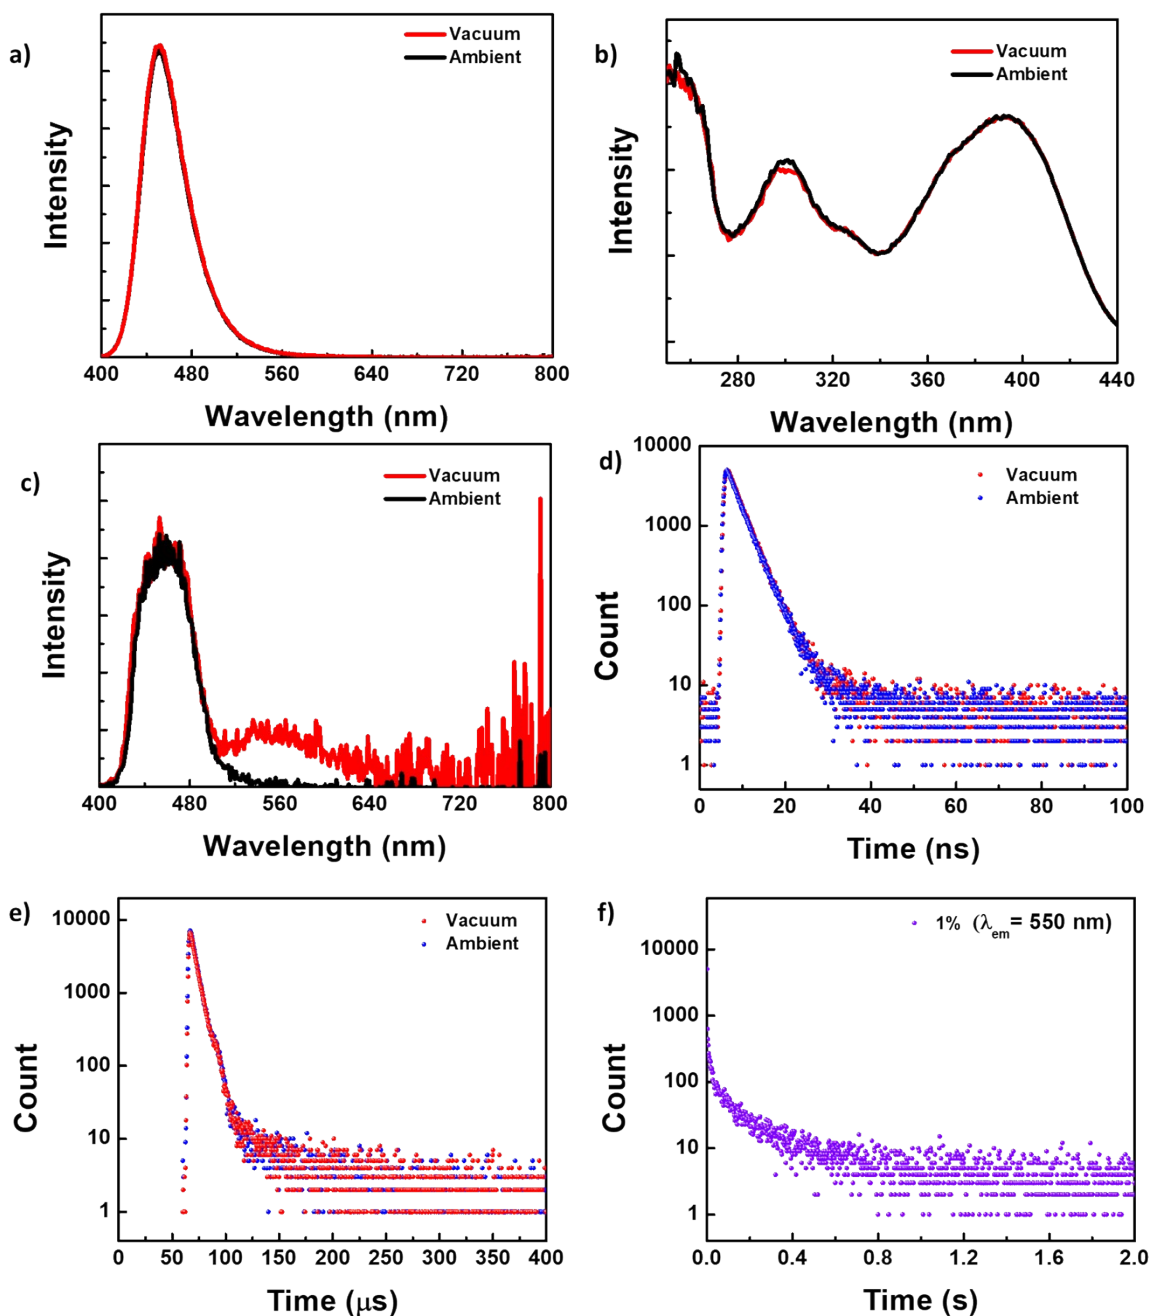

**Figure S48.** (a) Fluorescence spectra (b) excitation spectra corresponding to emission maxima (c) delayed fluorescence spectra [50  $\mu$ s delay] (d) fluorescence lifetime decay [ $\lambda_{ex} = 375$  nm and  $\lambda_{ex} = 450$  nm] (e) delayed fluorescence lifetime decay [ $\lambda_{ex} = 380$  nm and  $\lambda_{ex} = 450$  nm] and phosphorescence lifetime decay [ $\lambda_{ex} = 380$  nm and  $\lambda_{ex} = 550$  nm] under vacuum [absence of oxygen] and ambient atmosphere [presence of oxygen] at 298 K for **2** doped in PMMA matrix (1 wt%) [ $\lambda_{ex} = 380$  nm].



## Supplementary information

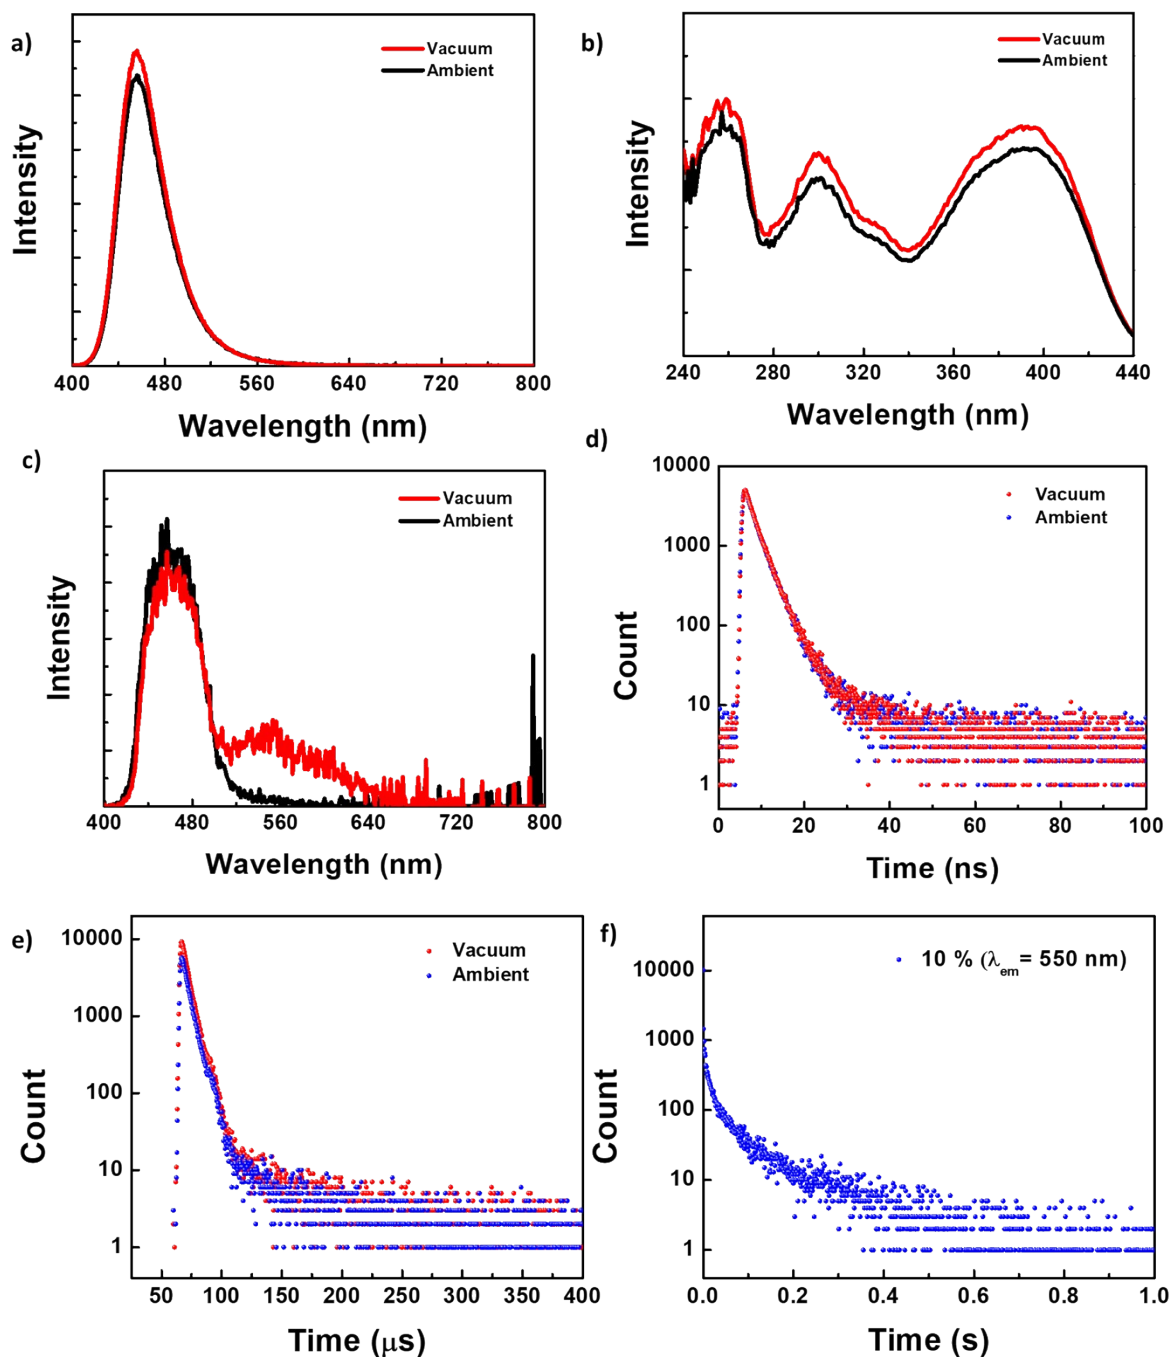

**Figure S49.** (a) Fluorescence spectra (b) excitation spectra corresponding to emission maxima (c) delayed fluorescence spectra [50  $\mu\text{s}$  delay] (d) fluorescence lifetime decay [ $\lambda_{\text{ex}} = 375$  nm and  $\lambda_{\text{ex}} = 455$  nm] (e) delayed fluorescence lifetime decay [ $\lambda_{\text{ex}} = 380$  nm and  $\lambda_{\text{ex}} = 455$  nm] and (f) phosphorescence lifetime decay [ $\lambda_{\text{ex}} = 380$  nm and  $\lambda_{\text{em}} = 550$  nm] under vacuum [absence of oxygen] and ambient atmosphere [presence of oxygen] at 298 K for **2** doped in PMMA matrix (10 wt%) [ $\lambda_{\text{ex}} = 380$  nm].

## Supplementary information

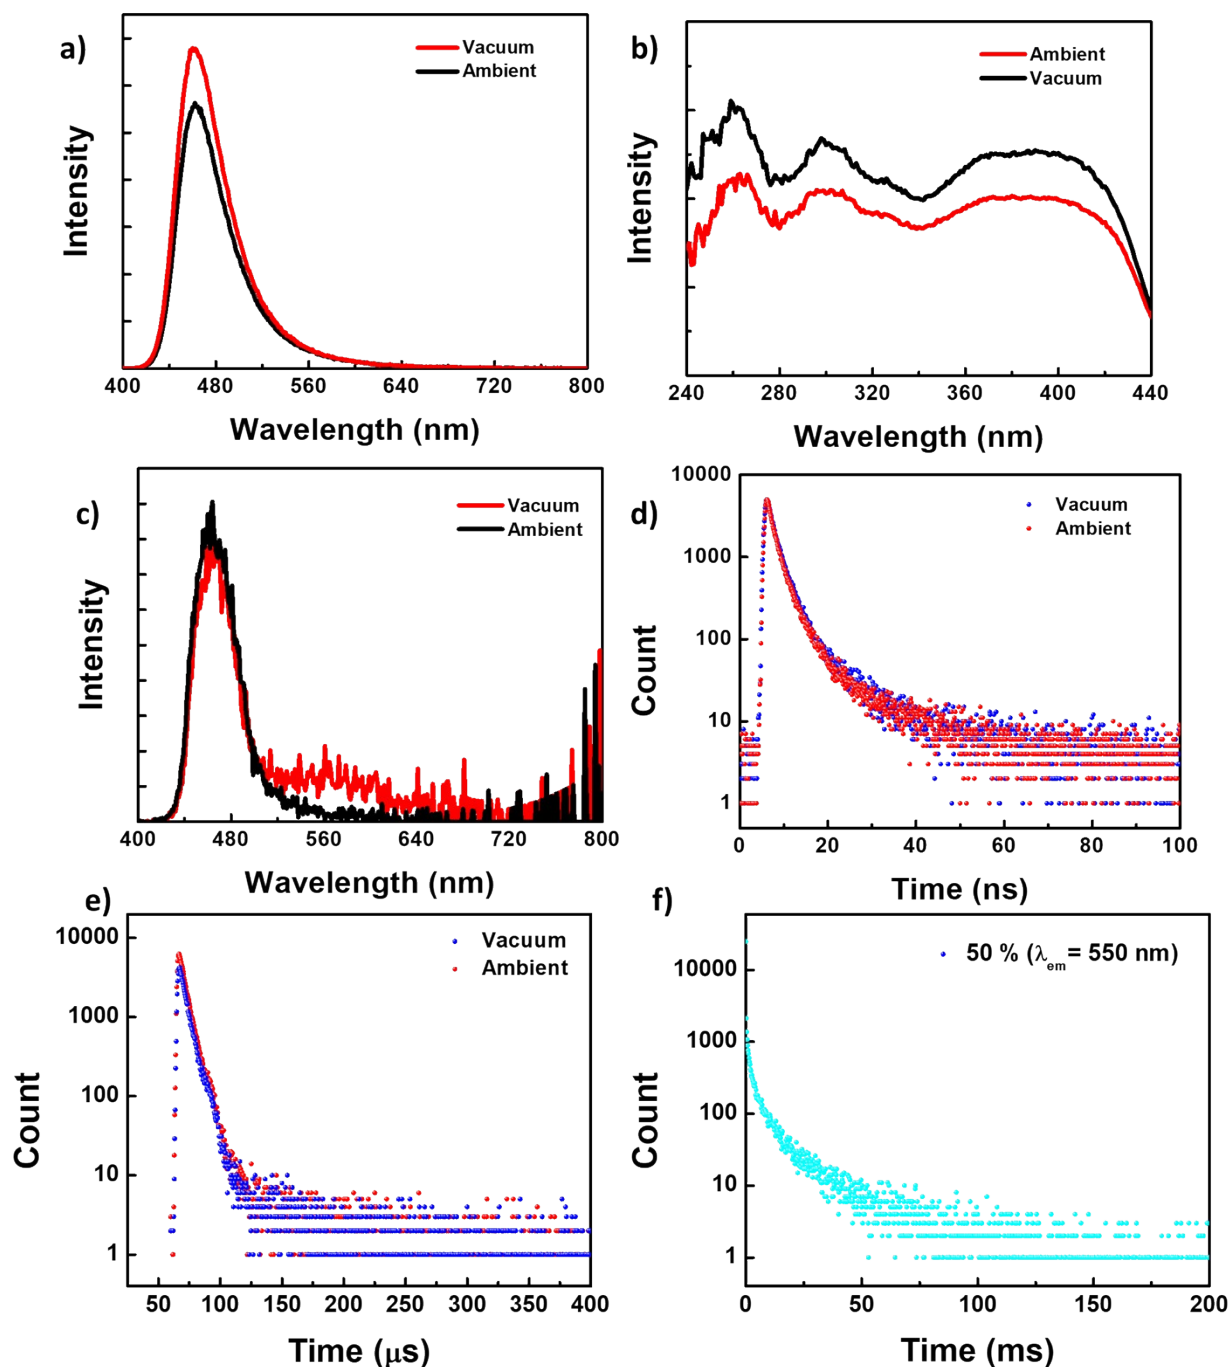

**Figure S50.** (a) Fluorescence spectra (b) excitation spectra corresponding to emission maxima (c) delayed fluorescence spectra [50  $\mu$ s delay] (d) fluorescence lifetime decay [ $\lambda_{ex} = 375$  nm and  $\lambda_{ex} = 460$  nm] (e) delayed fluorescence lifetime decay [ $\lambda_{ex} = 380$  nm and  $\lambda_{ex} = 460$  nm] under vacuum [absence of oxygen] and ambient atmosphere [presence of oxygen] at 298 K for **2** doped in PMMA matrix (50 wt%) [ $\lambda_{ex} = 380$  nm].

## Supplementary information

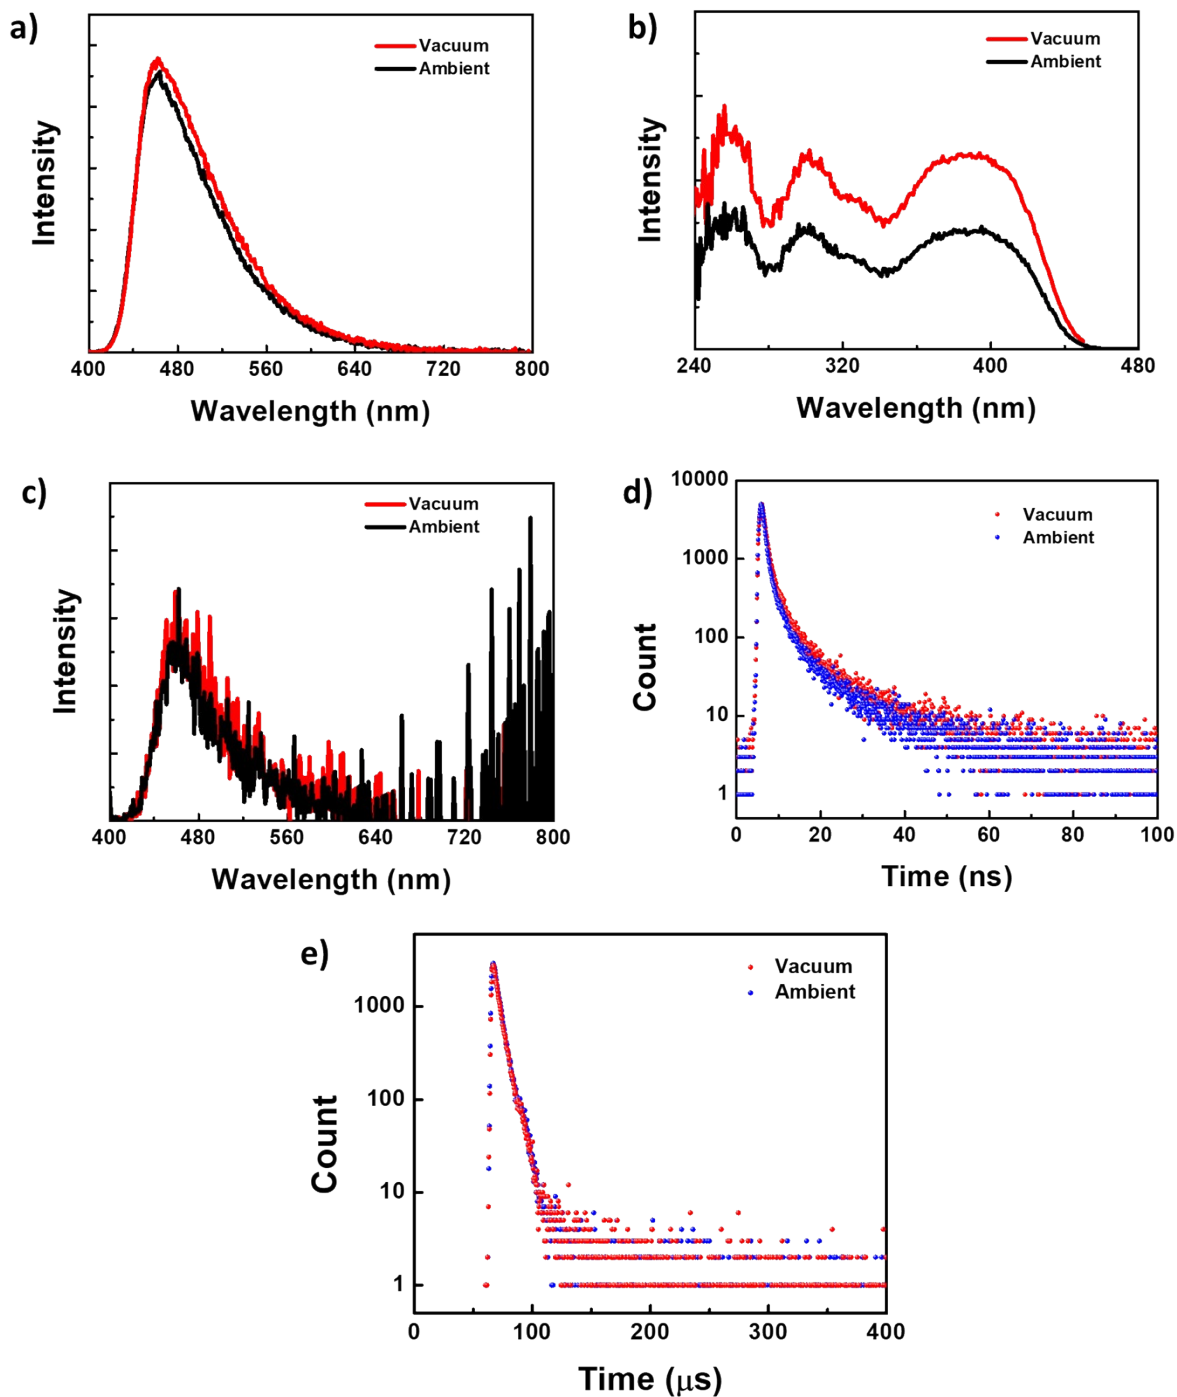

**Figure S51.** (a) Fluorescence spectra (b) excitation spectra corresponding to emission maxima (c) delayed fluorescence spectra [50  $\mu\text{s}$  delay] (d) fluorescence lifetime decay [ $\lambda_{\text{ex}} = 375$  nm and  $\lambda_{\text{ex}} = 460$  nm] (e) delayed fluorescence lifetime decay [ $\lambda_{\text{ex}} = 375$  nm and  $\lambda_{\text{ex}} = 460$  nm] under vacuum [absence of oxygen] and ambient atmosphere [presence of oxygen] at 298 K for **2** as neat film [ $\lambda_{\text{ex}} = 380$  nm]. Delayed fluorescence emission is weak in neat film, so we could not record the lifetime.

## Supplementary information

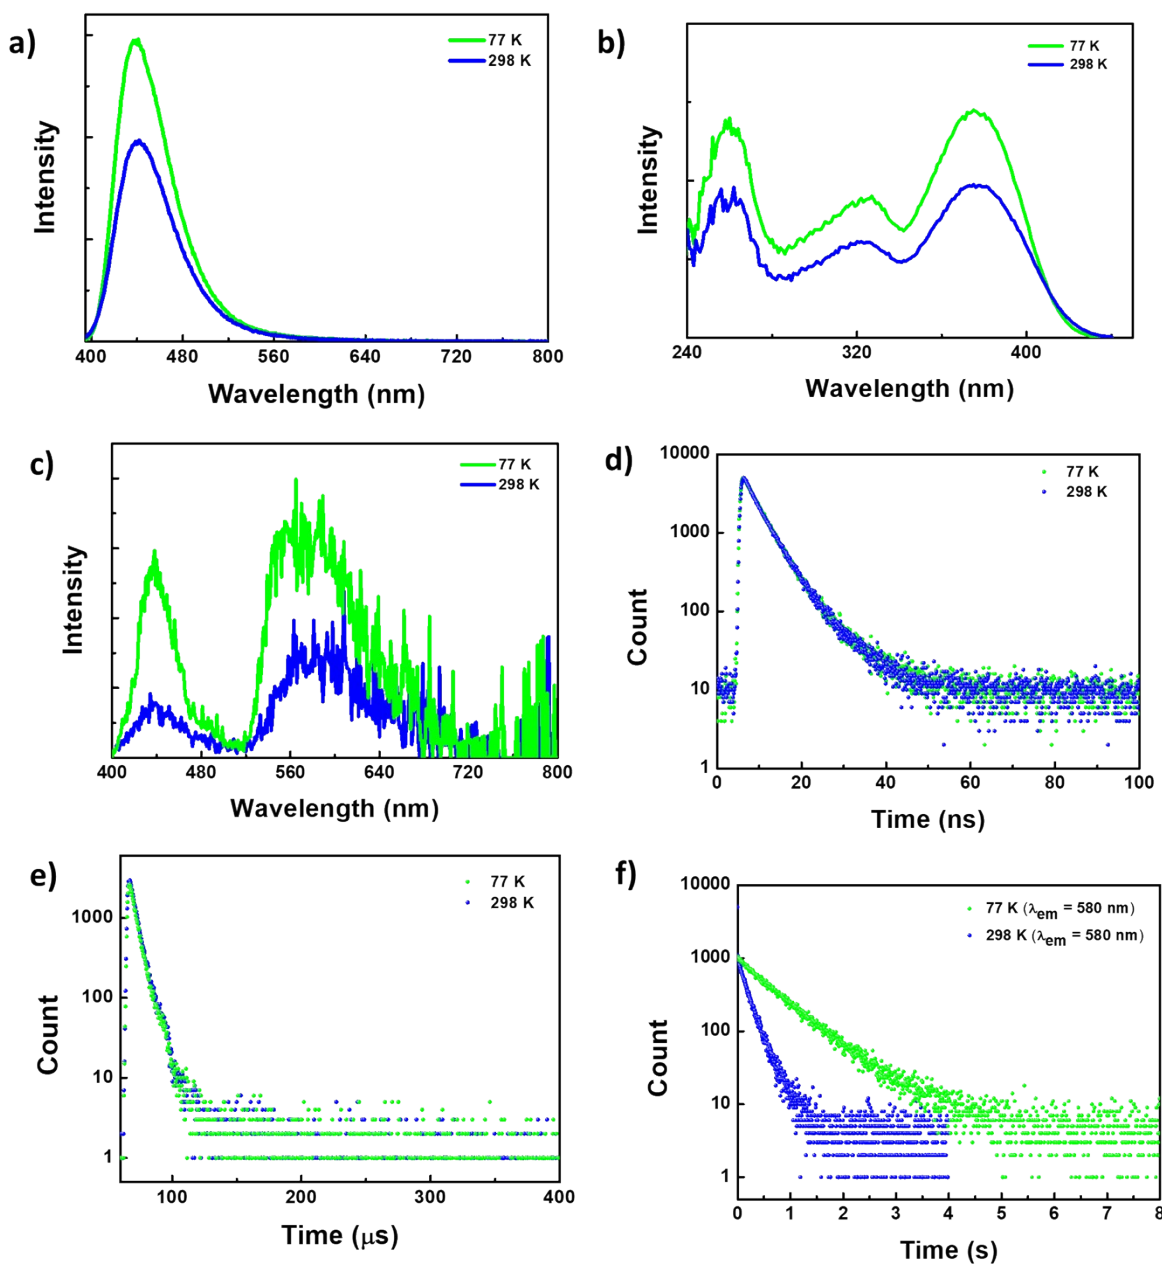

**Figure S52.** (a) Fluorescence spectra (b) excitation spectra at  $\lambda_{em} = 450$  nm (c) delayed fluorescence spectra [50  $\mu$ s delay] (d) fluorescence lifetime decay [ $\lambda_{ex} = 375$  nm and  $\lambda_{em} = 450$  nm] (e) delayed fluorescence lifetime decay [ $\lambda_{ex} = 380$  nm and  $\lambda_{em} = 450$  nm] and phosphorescence lifetime decay [ $\lambda_{ex} = 380$  nm and  $\lambda_{ex} = 580$  nm] at 298 K and 77 K under vacuum for **1** doped in PMMA matrix (1 wt%) [ $\lambda_{ex} = 380$  nm].

## Supplementary information

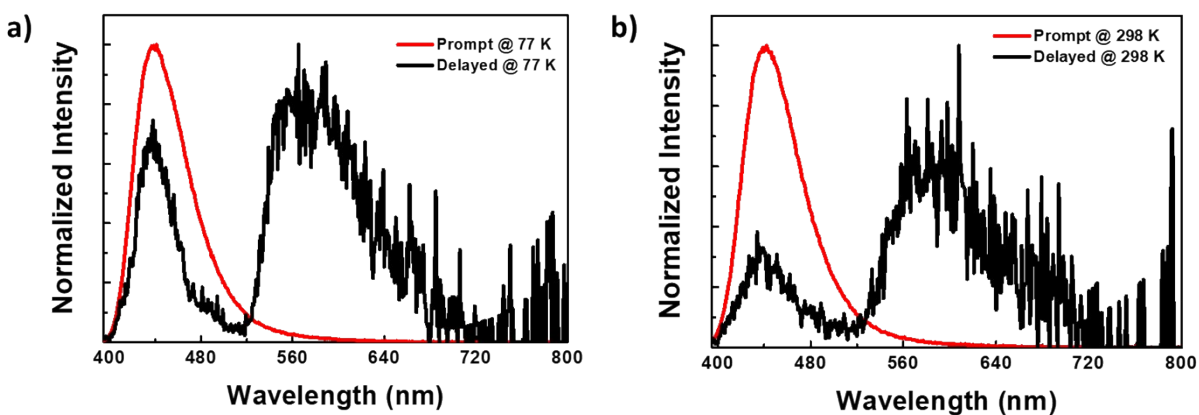

**Figure S53.** Prompt fluorescence spectra and delayed spectra [50  $\mu$ s delay] at (a) 77 K and (b) 298 K under vacuum for **1** doped in PMMA matrix (1 wt%) [ $\lambda_{\text{ex}} = 380$  nm].

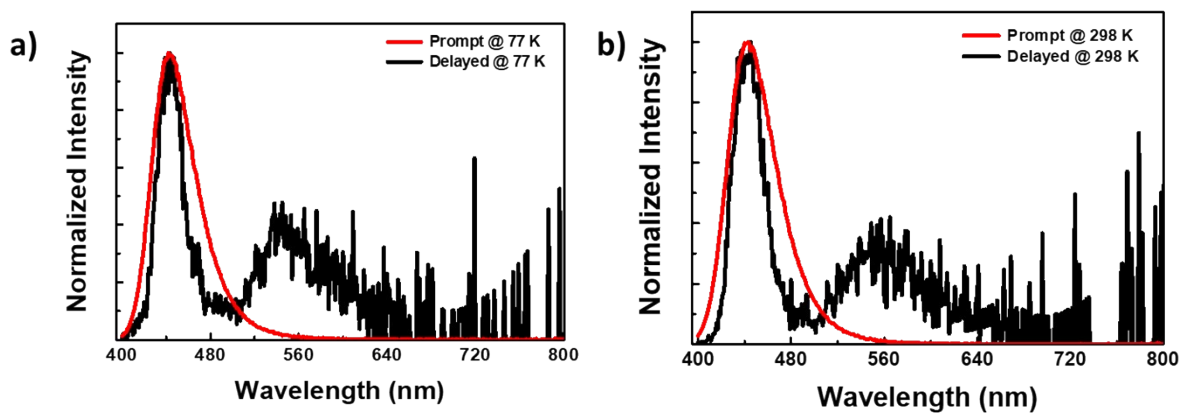

**Figure S54.** Prompt fluorescence spectra and delayed spectra [50  $\mu$ s delay] at (a) 77 K and (b) 298 K under vacuum for **2** doped in PMMA matrix (1 wt%) [ $\lambda_{\text{ex}} = 380$  nm].

## Supplementary information

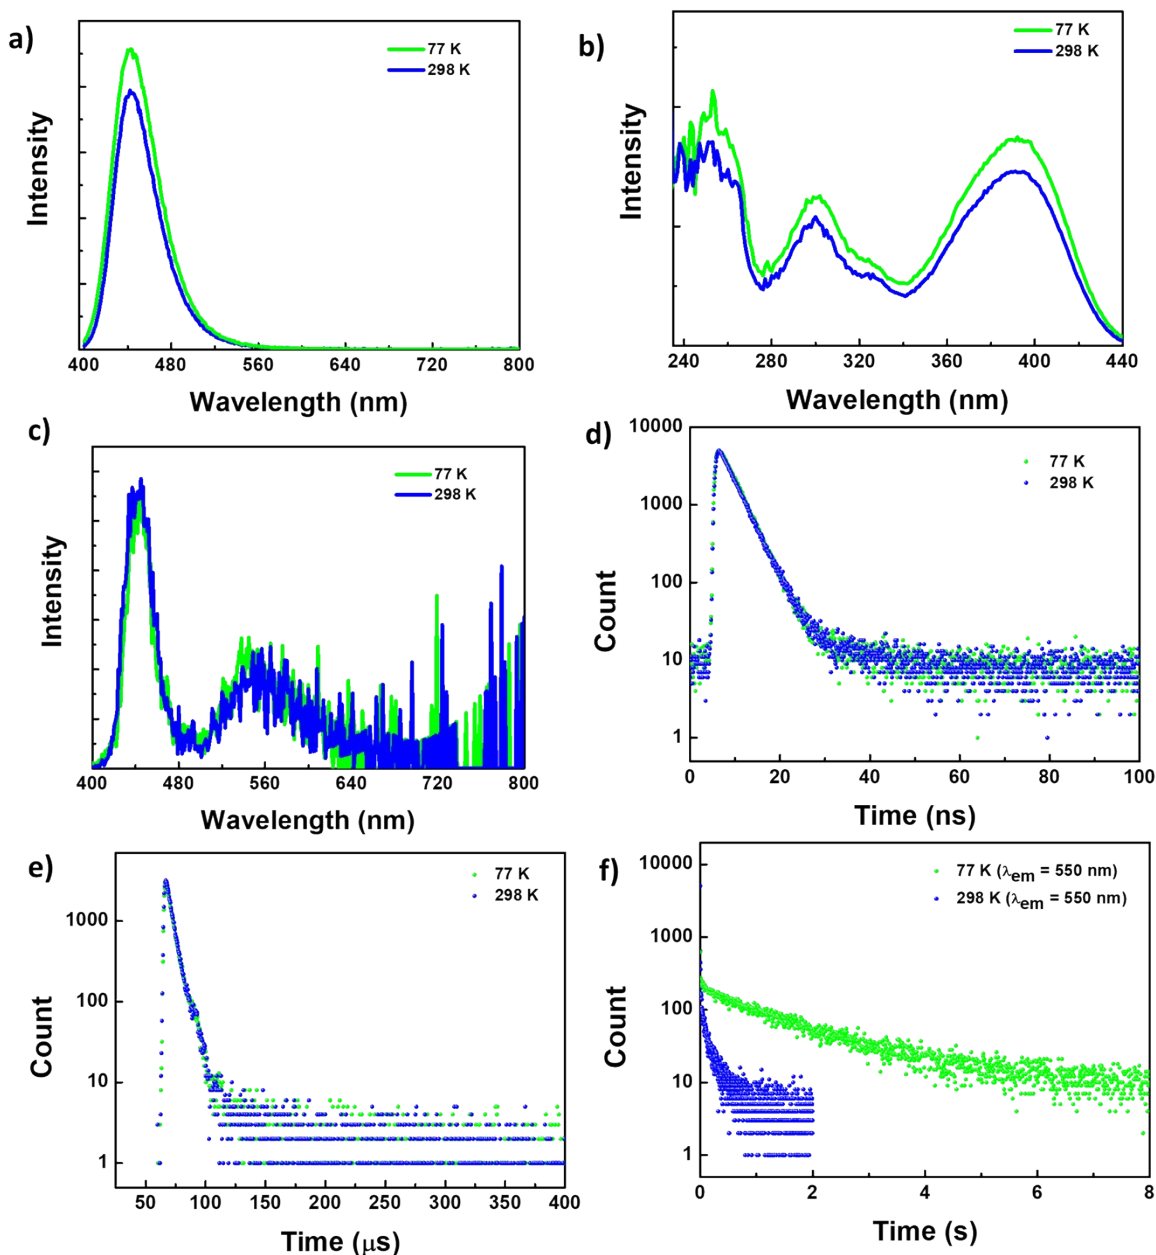

**Figure S55.** (a) Fluorescence spectra (b) excitation spectra at  $\lambda_{em} = 450$  nm (c) delayed fluorescence spectra [50  $\mu$ s delay] (d) fluorescence lifetime decay [ $\lambda_{ex} = 375$  nm and  $\lambda_{em} = 450$  nm] (e) delayed fluorescence lifetime decay [ $\lambda_{ex} = 380$  nm and  $\lambda_{em} = 450$  nm] and phosphorescence lifetime decay [ $\lambda_{ex} = 375$  nm and  $\lambda_{em} = 550$  nm] at 298 K and 77 K under vacuum for 2 doped in PMMA matrix (1 wt%) [ $\lambda_{ex} = 380$  nm].

## Supplementary information

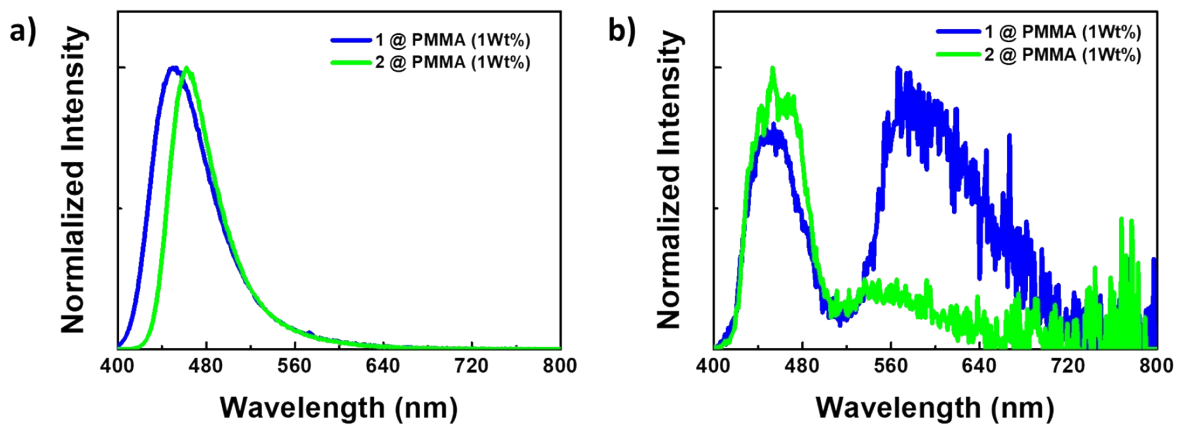

**Figure S56.** (a) Fluorescence spectra (b) delayed fluorescence spectra [50  $\mu$ s delay] at 298 K and 77 K under vacuum for **1** and **2** doped in PMMA matrix (1 wt%) [ $\lambda_{\text{ex}} = 380$  nm].

## Supplementary information

**Table S10:** Fluorescence lifetime for **1** under different atmospheric conditions along with total PLQY under ambient conditions at 298 K

|                      | Fluorescence lifetime (ns) |                            |                                    |                                    |                            |                            |                                    |                                    |                            |                            |                                    |                                    | PLQY [%] |
|----------------------|----------------------------|----------------------------|------------------------------------|------------------------------------|----------------------------|----------------------------|------------------------------------|------------------------------------|----------------------------|----------------------------|------------------------------------|------------------------------------|----------|
|                      | 77 K (Vacuum)              |                            |                                    |                                    | 298 K (Vacuum)             |                            |                                    |                                    | 298 K (Ambient)            |                            |                                    |                                    |          |
|                      | $\lambda_{\text{ex}}$ (nm) | $\lambda_{\text{em}}$ (nm) | $\tau_1$ (A <sub>1</sub> [%]) (ns) | $\tau_2$ (A <sub>2</sub> [%]) (ns) | $\lambda_{\text{ex}}$ (nm) | $\lambda_{\text{em}}$ (nm) | $\tau_1$ (A <sub>1</sub> [%]) (ns) | $\tau_2$ (A <sub>2</sub> [%]) (ns) | $\lambda_{\text{ex}}$ (nm) | $\lambda_{\text{em}}$ (nm) | $\tau_1$ (A <sub>1</sub> [%]) (ns) | $\tau_2$ (A <sub>2</sub> [%]) (ns) |          |
| <b>Neat</b>          |                            |                            |                                    |                                    | 375                        | 450                        | 1.72 (78.02)                       | 6.22 (21.98)                       | 375                        | 450                        | 1.59 (78.13)                       | 6.22 (21.87)                       | 51.1     |
|                      |                            |                            |                                    |                                    | 375                        | 525                        | 9.22 (47.28)                       | 23.67 (52.72)                      | 375                        | 525                        | 8.24 (41.07)                       | 22.53 (58.93)                      |          |
| <b>50 wt% @ PMMA</b> |                            |                            |                                    |                                    | 375                        | 460                        | 2.81 (51.07)                       | 7.43 (48.93)                       | 375                        | 460                        | 2.82 (51.87)                       | 7.35 (48.13)                       | 57.4     |
| <b>10 wt% @ PMMA</b> |                            |                            |                                    |                                    | 375                        | 450                        | 2.77 (43.19)                       | 6.93 (56.81)                       | 375                        | 450                        | 2.83 (46.45)                       | 6.97 (53.55)                       | 72.6     |
| <b>1 wt% @ PMMA</b>  | 375                        | 450                        | 4.00 (81.53)                       | 9.22 (18.47)                       | 375                        | 450                        | 3.20 (46.29)                       | 7.18 (53.71)                       | 375                        | 450                        | 3.29 (48.66)                       | 7.23 (51.34)                       | 76.7     |



## Supplementary information

**Table S11:** Delayed fluorescence and phosphorescence lifetime for **1** under different atmospheric conditions.

|                        | Delayed Fluorescence lifetime / Phosphorescence lifetime |                               |                                  |                                  |                                                                        |                               |                                  |                                  |                            |                               |                                  |                                  |
|------------------------|----------------------------------------------------------|-------------------------------|----------------------------------|----------------------------------|------------------------------------------------------------------------|-------------------------------|----------------------------------|----------------------------------|----------------------------|-------------------------------|----------------------------------|----------------------------------|
|                        | 77 K (Vacuum)                                            |                               |                                  |                                  | 298 K (Vacuum)                                                         |                               |                                  |                                  | 298 K (Ambient)            |                               |                                  |                                  |
|                        | $\lambda_{\text{ex}}$<br>(nm)                            | $\lambda_{\text{em}}$<br>(nm) | $\tau_1$<br>(A <sub>1</sub> [%]) | $\tau_2$<br>(A <sub>2</sub> [%]) | $\lambda_{\text{ex}}$<br>(nm)                                          | $\lambda_{\text{em}}$<br>(nm) | $\tau_1$<br>(A <sub>1</sub> [%]) | $\tau_2$<br>(A <sub>2</sub> [%]) | $\lambda_{\text{ex}}$ (nm) | $\lambda_{\text{em}}$<br>(nm) | $\tau_1$<br>(A <sub>1</sub> [%]) | $\tau_2$<br>(A <sub>2</sub> [%]) |
| <b>Neat</b>            | -                                                        | -                             | -                                | -                                | Emission was very weak so we could not record lifetime with our source |                               |                                  |                                  |                            |                               |                                  |                                  |
| <b>50 wt% @ PMMA</b>   |                                                          |                               |                                  |                                  | 375                                                                    | 460                           | 5.28 $\mu\text{s}$<br>(88.97)    | 14.15 $\mu\text{s}$<br>(11.03)   | 375                        | 460                           | 5.99 $\mu\text{s}$<br>(100)      | -                                |
| <b>10 wt% @ PMMA A</b> |                                                          |                               |                                  |                                  | 375                                                                    | 450                           | 4.98 $\mu\text{s}$<br>(79.93)    | 10.92 $\mu\text{s}$<br>(20.07)   | -                          | -                             | -                                | -                                |
|                        |                                                          |                               |                                  |                                  | 375                                                                    | 580                           | 8.57 ms<br>(1.03)                | 134.40 ms<br>(98.97)             | -                          | -                             | -                                | -                                |
|                        |                                                          |                               |                                  |                                  | 375                                                                    | 630                           | 18.06 ms<br>(7.69)               | 109.36 ms<br>(92.31)             | -                          | -                             | -                                | -                                |
| <b>1 wt% @ PMMA A</b>  | 375                                                      | 450                           | 5.21 $\mu\text{s}$<br>(90.16)    | 12.96 $\mu\text{s}$<br>(9.84)    | 375                                                                    | 450                           | 4.75 $\mu\text{s}$<br>(76.15)    | 10.73 $\mu\text{s}$<br>(23.85)   | 375                        | 450                           | 5.57 $\mu\text{s}$<br>(94.01)    | 15.02 $\mu\text{s}$<br>(5.99)    |
|                        | 375                                                      | 540                           | 735.52 ms<br>(100)               |                                  | 375                                                                    | 540                           | 153.25 ms<br>(55.87)             | 290.30 ms<br>(44.13)             | -                          | -                             | -                                | -                                |
|                        | 375                                                      | 580                           | 560.34 ms<br>(50.36)             | 952.45 ms<br>(49.94)             | 375                                                                    | 580                           | 92.12 ms<br>(31.86)              | 203.80 ms<br>(68.14)             | -                          | -                             | -                                | -                                |

## Supplementary information

**Table S12:** Fluorescence lifetime for **2** under different atmospheric conditions along with total PLQY under ambient conditions at 298 K

|                     | Fluorescence lifetime (ns) |                            |                                    |                                    |                            |                            |                                    |                                    |                                    |                            |                            |                                    |                                    |                                    | PLQY [%] |
|---------------------|----------------------------|----------------------------|------------------------------------|------------------------------------|----------------------------|----------------------------|------------------------------------|------------------------------------|------------------------------------|----------------------------|----------------------------|------------------------------------|------------------------------------|------------------------------------|----------|
|                     | 77 K (Vacuum)              |                            |                                    |                                    | 298 K (Vacuum)             |                            |                                    |                                    |                                    | 298 K (Ambient)            |                            |                                    |                                    |                                    |          |
|                     | $\lambda_{\text{ex}}$ (nm) | $\lambda_{\text{em}}$ (nm) | $\tau_1$ (A <sub>1</sub> [%]) (ns) | $\tau_2$ (A <sub>2</sub> [%]) (ns) | $\lambda_{\text{ex}}$ (nm) | $\lambda_{\text{em}}$ (nm) | $\tau_1$ (A <sub>1</sub> [%]) (ns) | $\tau_2$ (A <sub>2</sub> [%]) (ns) | $\tau_3$ (A <sub>3</sub> [%]) (ns) | $\lambda_{\text{ex}}$ (nm) | $\lambda_{\text{em}}$ (nm) | $\tau_1$ (A <sub>1</sub> [%]) (ns) | $\tau_2$ (A <sub>2</sub> [%]) (ns) | $\tau_3$ (A <sub>3</sub> [%]) (ns) |          |
| <b>Neat</b>         |                            |                            |                                    |                                    | 390                        | 450                        | 0.82 (42.32)                       | 3.22 (39.19)                       | 13.51 (18.49)                      | 390                        | 450                        | 0.70 (45.18)                       | 2.88 (37.23)                       | 13.21 (17.58)                      | 26.8     |
|                     |                            |                            |                                    |                                    | 390                        | 500                        | 5.12 (58.93)                       | 30.11 (41.07)                      | -                                  | 390                        | 500                        | 4.66 (58.56)                       | 27.42 (41.44)                      | -                                  |          |
| <b>50 wt% @PMMA</b> |                            |                            |                                    |                                    | 375                        | 450                        | 1.24 (33.02)                       | 3.05 (55.54)                       | 12.66 (11.43)                      | 375                        | 450                        | 1.11 (33.17)                       | 2.89 (55.34)                       | 12.38 (11.49)                      | 46.6     |
| <b>10 wt% @PMMA</b> |                            |                            |                                    |                                    | 375                        | 450                        | 2.58 (86.52)                       | 6.65 (13.48)                       |                                    | 375                        | 450                        | 2.53 (83.05)                       | 6.10 (16.95)                       |                                    | 78.1     |
| <b>1 wt% @PMMA</b>  | 375                        | 450                        | 3.47 (98.26)                       | 37.65 (1.74)                       | 375                        | 450                        | 3.15 (97.77)                       | 11.42 (2.23)                       |                                    | 375                        | 450                        | 3.15 (97.15)                       | 10.12 (2.85)                       |                                    | 88.5     |

## Supplementary information

**Table S13:** Delayed fluorescence and phosphorescence lifetime for **2** under different atmospheric conditions.

|                         | Delayed Fluorescence lifetime ( $\mu\text{s}$ )/ Phosphorescence lifetime (ms) |                               |                               |                                |                               |                               |                               |                                |                               |                               |                               |                                |
|-------------------------|--------------------------------------------------------------------------------|-------------------------------|-------------------------------|--------------------------------|-------------------------------|-------------------------------|-------------------------------|--------------------------------|-------------------------------|-------------------------------|-------------------------------|--------------------------------|
|                         | 77 K (Vacuum)                                                                  |                               |                               |                                | 298 K (Vacuum)                |                               |                               |                                | 298 K (Ambient)               |                               |                               |                                |
|                         | $\lambda_{\text{ex}}$<br>(nm)                                                  | $\lambda_{\text{em}}$<br>(nm) | $\tau_1$<br>( $A_1$ [%])      | $\tau_2$<br>( $A_2$ [%])       | $\lambda_{\text{ex}}$<br>(nm) | $\lambda_{\text{em}}$<br>(nm) | $\tau_1$<br>( $A_1$ [%])      | $\tau_2$<br>( $A_2$ [%])       | $\lambda_{\text{ex}}$<br>(nm) | $\lambda_{\text{em}}$<br>(nm) | $\tau_1$<br>( $A_1$ [%])      | $\tau_2$<br>( $A_2$ [%])       |
| <b>Neat</b>             | -                                                                              | -                             | -                             | -                              | 390                           | 450                           | 6.06 $\mu\text{s}$<br>(100)   | -                              | 390                           | 450                           | 5.14 $\mu\text{s}$<br>(79.18) | 10.49 $\mu\text{s}$<br>(20.82) |
| <b>50 wt%<br/>@PMMA</b> | -                                                                              | -                             | -                             | -                              | 390                           | 450                           | 4.13 $\mu\text{s}$<br>(50.09) | 8.50 $\mu\text{s}$<br>(49.91)  | 390                           | 450                           | 4.31 $\mu\text{s}$<br>(55.58) | 8.77 $\mu\text{s}$<br>(44.42)  |
|                         | -                                                                              | -                             | -                             | -                              | 390                           | 550                           | 1.78 ms<br>(44.58)            | 14.4 ms<br>(55.42)             | -                             | -                             | -                             | -                              |
| <b>10 wt%<br/>@PMMA</b> | -                                                                              | -                             | -                             | -                              | 390                           | 450                           | 5.14 $\mu\text{s}$<br>(82.03) | 11.85 $\mu\text{s}$<br>(17.97) | 390                           | 450                           | 4.30 $\mu\text{s}$<br>(59.10) | 9.13 $\mu\text{s}$<br>(40.90)  |
|                         | -                                                                              | -                             | -                             | -                              | 390                           | 550                           | 12.65 ms<br>(39.60)           | 103.90 ms<br>(60.40)           | -                             | -                             | -                             | -                              |
| <b>1 wt%<br/>@PMMA</b>  | 390                                                                            | 450                           | 4.65 $\mu\text{s}$<br>(80.29) | 11.17 $\mu\text{s}$<br>(19.71) | 390                           | 450                           | 6.29 $\mu\text{s}$<br>(94.65) | 42.24 $\mu\text{s}$<br>(5.35)  | 390                           | 450                           | 4.36 $\mu\text{s}$<br>(61.19) | 9.41 $\mu\text{s}$<br>(38.81)  |
|                         | 390                                                                            | 550                           | 241.84 ms<br>(5.18)           | 1583.23 ms<br>(94.82)          | 390                           | 550                           | 10.92 ms<br>(29.60)           | 179.98 ms<br>(70.40)           | -                             | -                             | -                             | -                              |

## Supplementary information

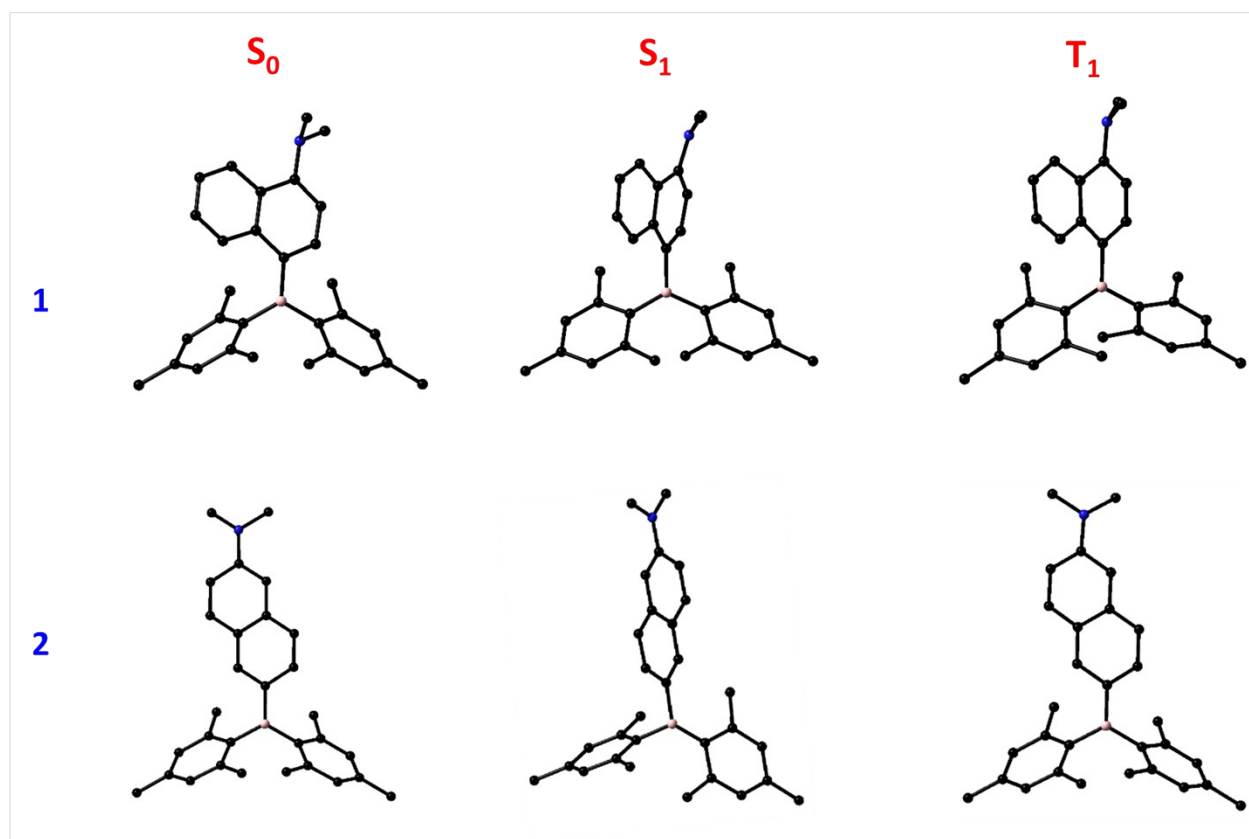

**Figure S57.** Optimized geometry of  $S_0$ ,  $S_1$ , and  $T_1$  states for **1** and **2** from DFT/TD-DFT calculations using B3LYP functional and 6-31G(d) basis set.

## Supplementary information

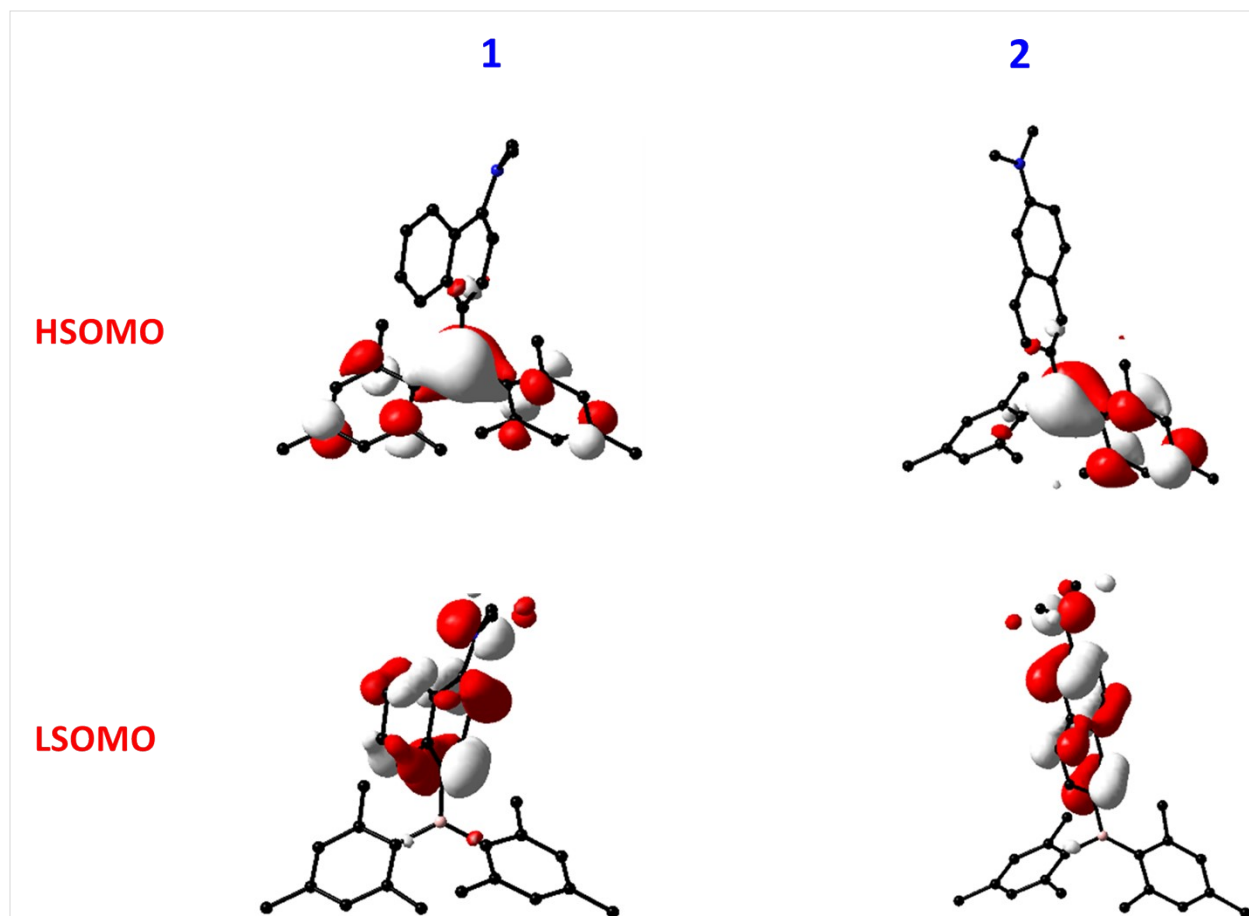

**Figure S58.** MO's from the optimized geometry of  $S_1$  state for **1** and **2** from DFT/TD-DFT calculations using B3LYP functional and 6-31G (d, p) basis set.

## Supplementary information

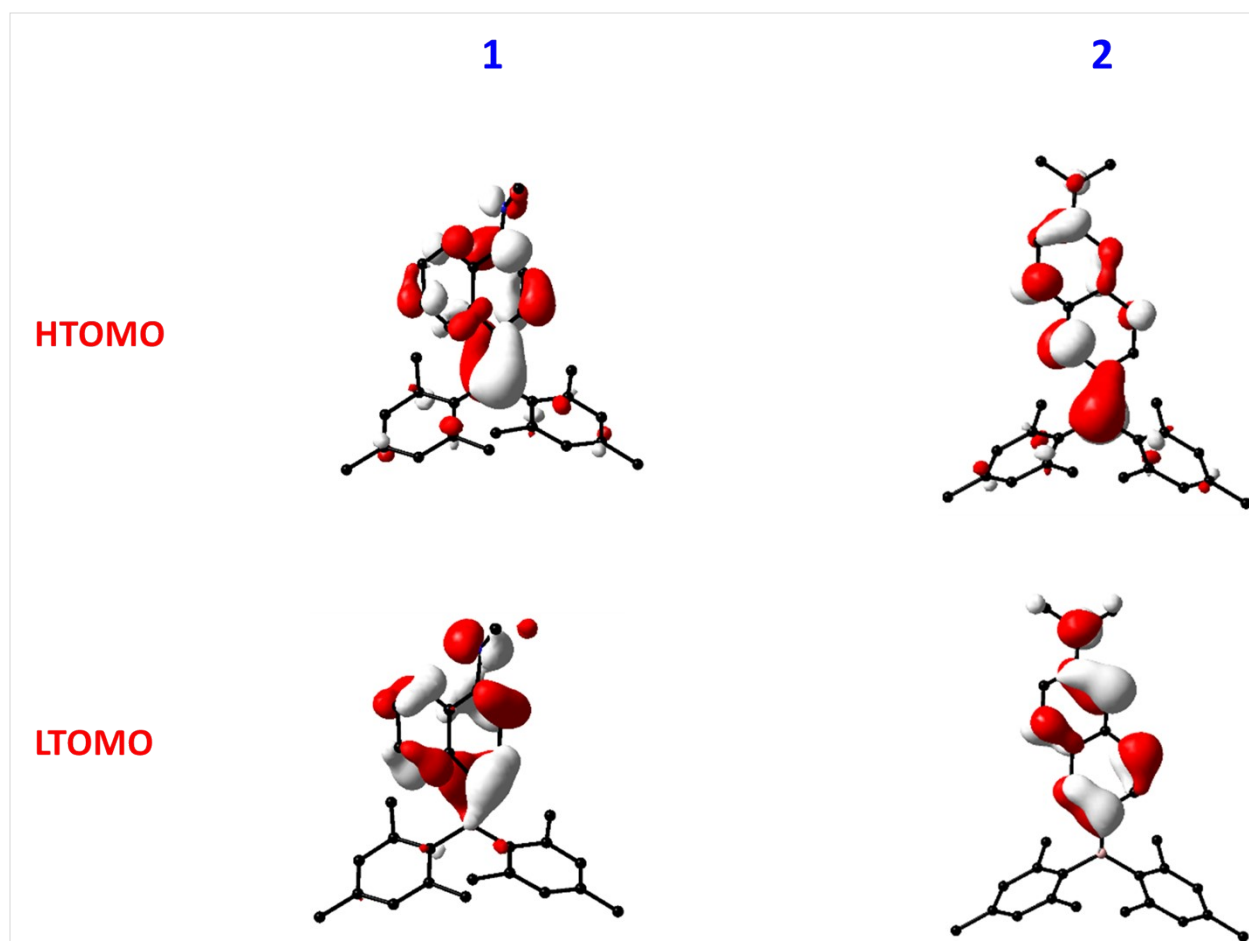

**Figure S59.** MO's from the optimized geometry of  $T_1$  for **1** and **2** from DFT/TD-DFT calculations using B3LYP functional and 6-31G (d, p) basis set.

## Supplementary information

**Table S14:** Comparison of different structural and geometrical parameters of **1** and **2** in  $S_0$ ,  $S_1$ , and  $T_1$  obtained from DFT/TD-DFT calculations using B3LYP functional and 6-31G(d, p) basis set.

| Parameter                     | 1            |             |             | 2            |             |             |
|-------------------------------|--------------|-------------|-------------|--------------|-------------|-------------|
|                               | Ground State | $S_1$ State | $T_1$ State | Ground State | $S_1$ State | $T_1$ State |
| Dipole moment (D)             | 1.72         | 1.54        | 2.76        | 4.19         | 2.25        | 3.64        |
| $\Sigma_{(C-B-C)} (^{\circ})$ | 359.9        | 359.9       | 359.9       | 360          | 359.8       | 360         |
| $\Sigma_{(C-N-C)} (^{\circ})$ | 343.5        | 357.4       | 350.3       | 358.1        | 360         | 350.8       |
| B-C (Å)                       | 1.570        | 1.633       | 1.558       | 1.561        | 1.623       | 1.558       |
| N-C (Å)                       | 1.418        | 1.374       | 1.403       | 1.386        | 1.365       | 1.398       |
| $\theta_{B-N} (^{\circ})$     | 79.6         | 88.5        | 73.6        | 28.4         | 73.9        | 22.3        |
| $\theta_{B-Nap} (^{\circ})$   | 35.8         | 59.8        | 33.3        | 22.8         | 73.7        | 22.9        |
| $\theta_{N-Nap} (^{\circ})$   | 61.3         | 40.7        | 56.2        | 12.9         | 0.3         | 36.2        |

## Supplementary information

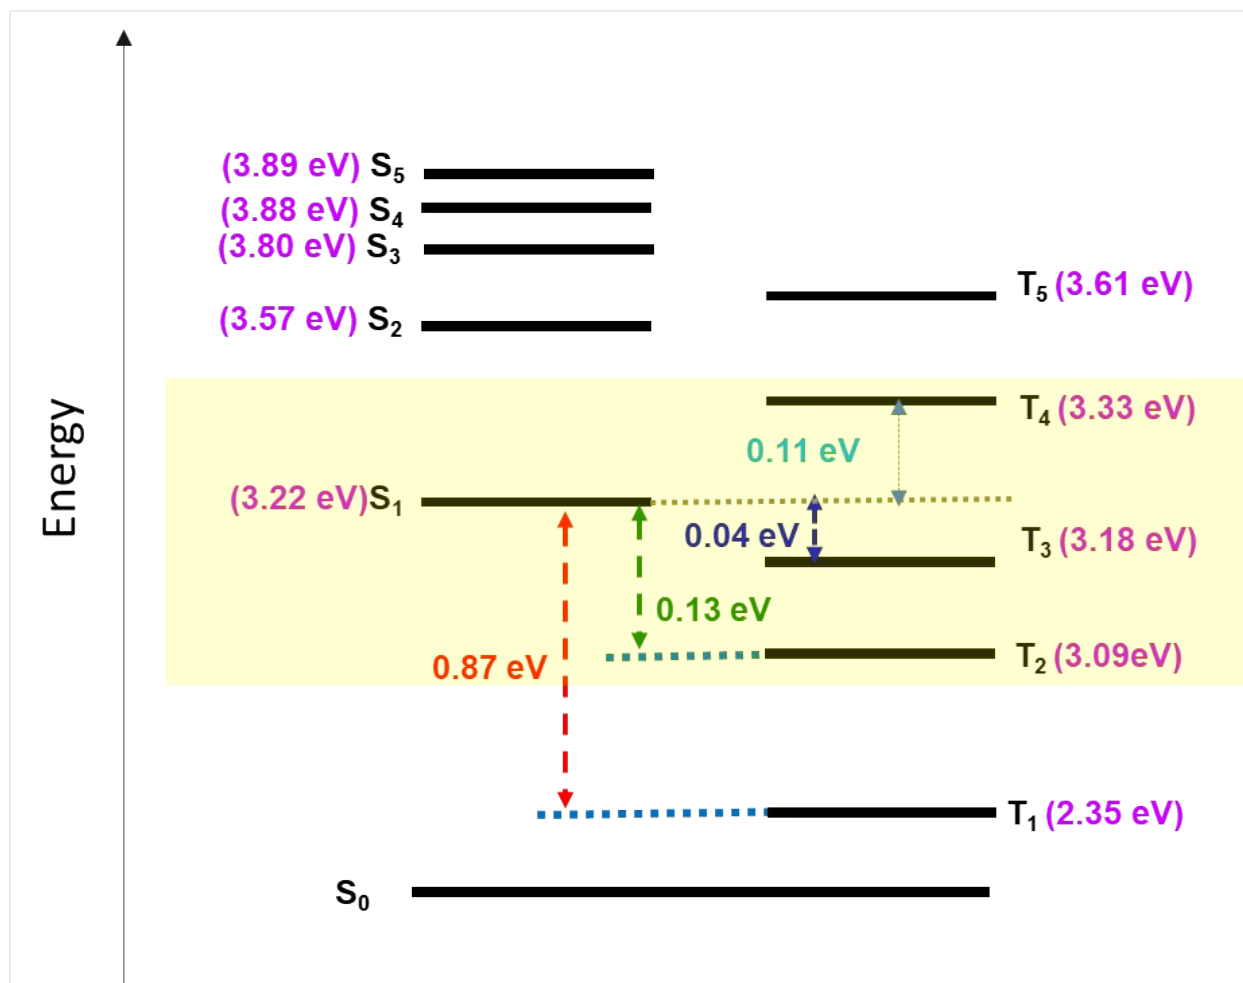

**Figure S60.** Energy level diagram showing singlet-triplet energy gap, and possible ISC channel for **1** [energy levels in the diagram are not up-to-scale, most possible T<sub>n</sub> state involved in for spin-crossover according to the energy difference are highlighted in yellow box] (Energy levels are calculated from singlet and triplet vertical transitions through TD-DFT using 6-31G (d, p)/B3LYP level of theory).



## Supplementary information

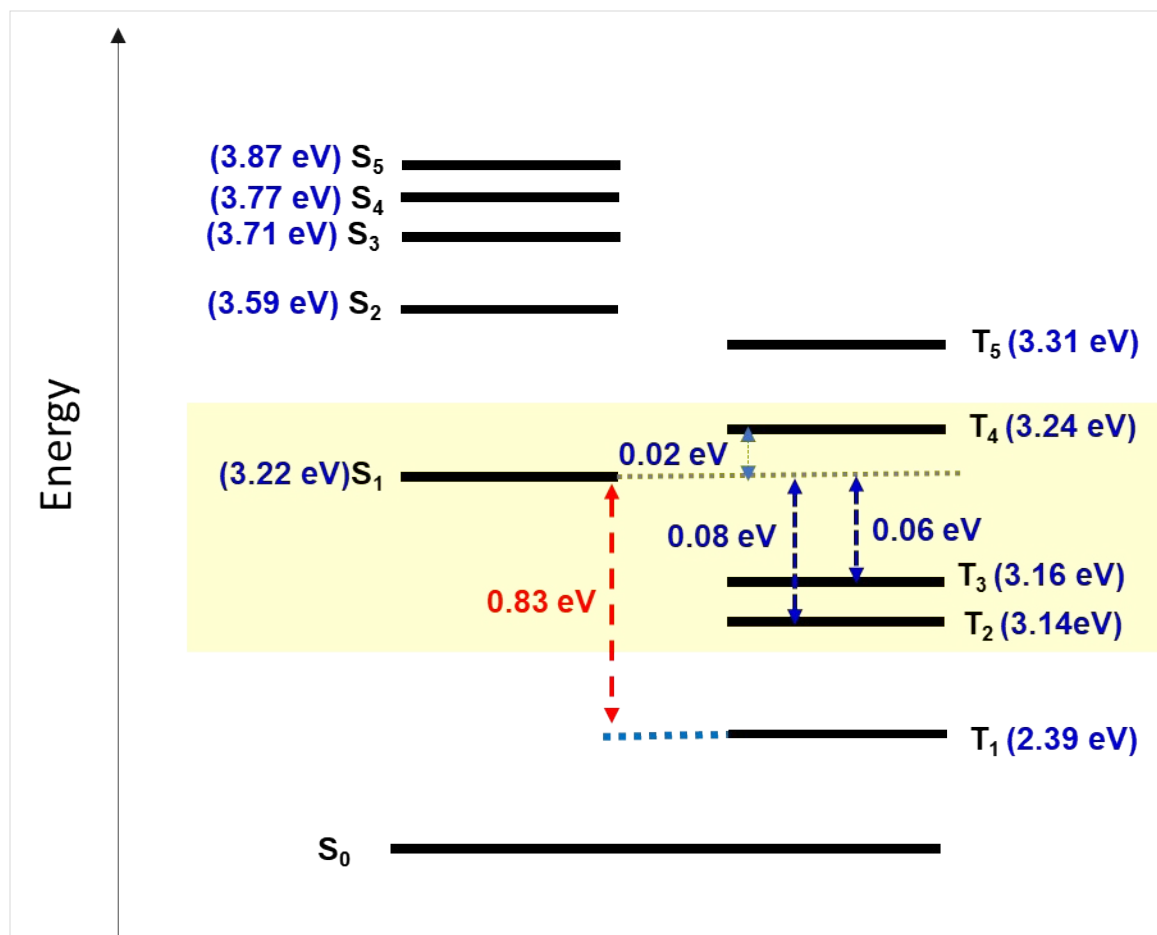

**Figure S61.** Energy level diagram showing singlet-triplet energy gap, and possible ISC channel for **2** [energy levels in the diagram are not up-to-scale, most possible  $T_n$  state involved in for spin-crossover according to the energy difference are highlighted in yellow box] (Energy levels are calculated from singlet and triplet vertical transitions through TD-DFT using 6-31G (d, p)/B3LYP level of theory).

## Supplementary information

**Table S15:** List of spin-orbital coupling values for **1** and **2** between different singlet and triplet energy levels obtained theoretically using B3LYP/6-31G(d,p) level of theory.

| Transition                     | SOC (cm <sup>-1</sup> ) |          |
|--------------------------------|-------------------------|----------|
|                                | <b>1</b>                | <b>2</b> |
| S <sub>0</sub> →T <sub>1</sub> | 0.1574                  | 0.0781   |
| S <sub>0</sub> →T <sub>2</sub> | 0.2707                  | 0.1612   |
| S <sub>0</sub> →T <sub>3</sub> | 0.8062                  | 0.6622   |
| S <sub>1</sub> →T <sub>1</sub> | 0.4859                  | 0.1574   |
| S <sub>1</sub> →T <sub>2</sub> | 1.2284                  | 0.2707   |
| S <sub>1</sub> →T <sub>3</sub> | 0.4940                  | 0.8062   |
| S <sub>1</sub> →T <sub>4</sub> | 0.3472                  | 0.0547   |
| S <sub>1</sub> →T <sub>5</sub> | 0.1652                  | 0.1994   |

## Supplementary information

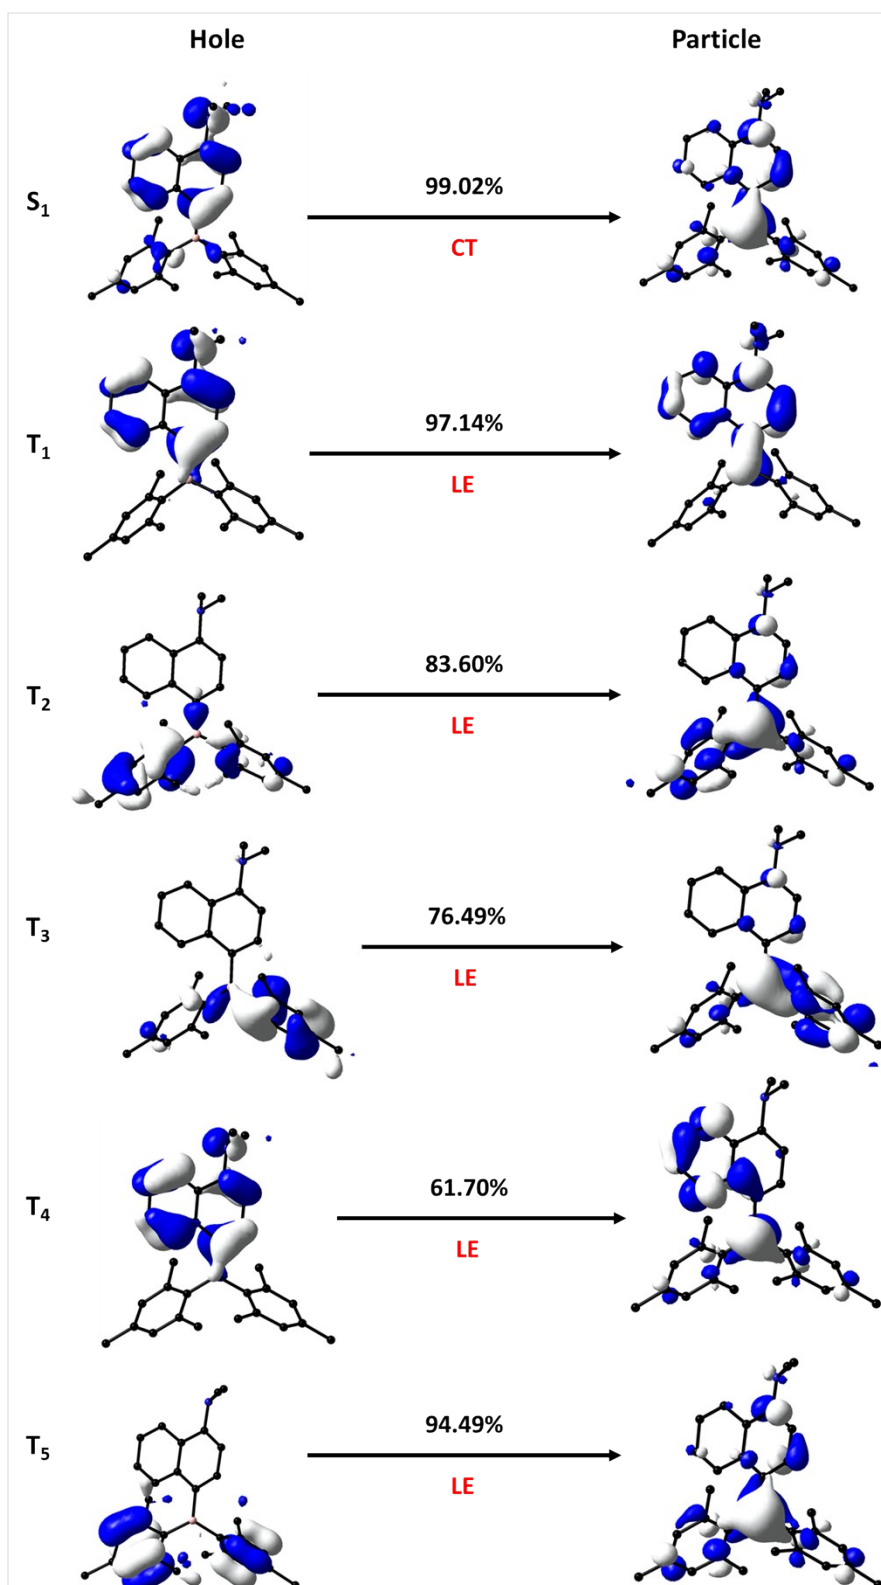

**Figure S62.** Natural transition orbitals (NTOs) for **1** calculated for S<sub>1</sub> and T<sub>1</sub>-T<sub>5</sub> using B3LYP functional and 6-31G (d) basis set.

## Supplementary information

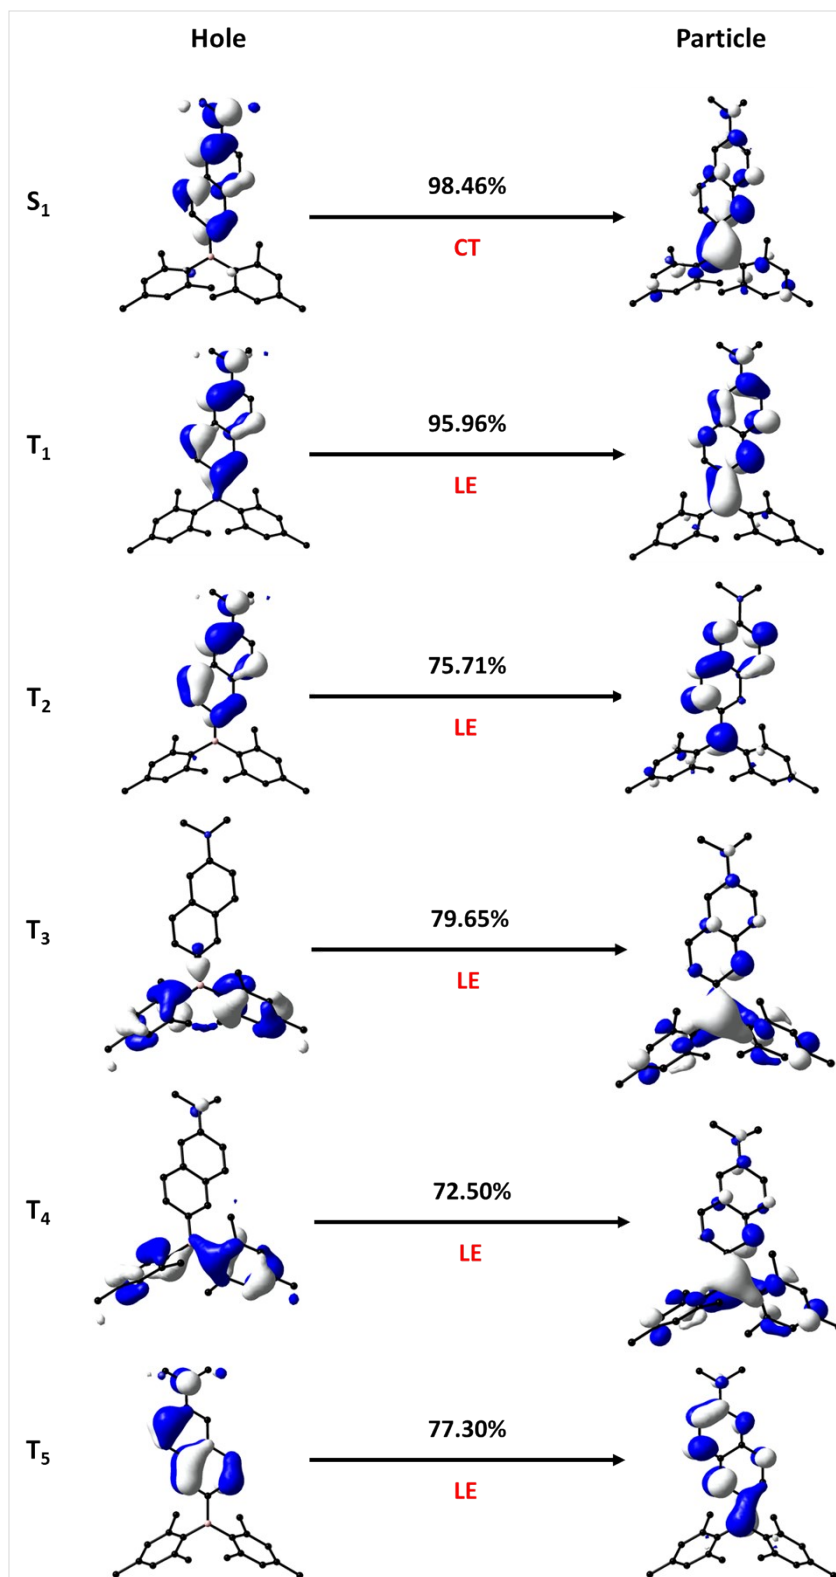

**Figure S63.** Natural transition orbitals (NTOs) for **2** calculated for S<sub>1</sub> and T<sub>1</sub>-T<sub>5</sub> using B3LYP functional and 6-31G (d) basis set.

## Supplementary information

**Table S16:** Computed triplet vertical transitions involved in **1** calculated through TD-DFT calculation are done using 6-31G (d, p) basis set B3LYP functional in Gaussian09 in the gas phase.

| Excited State  | E (eV) | E (nm) | Dominant transitions (%)                                            | $\Delta E_{S1-Tn}$ |
|----------------|--------|--------|---------------------------------------------------------------------|--------------------|
| T <sub>1</sub> | 2.3453 | 528.65 | HOMO →LUMO (40.3)<br>HOMO →LUMO+1 (5.9)                             | 0.8738             |
| T <sub>2</sub> | 3.0891 | 401.36 | HOMO-2 →LUMO+3 (2.5)<br>HOMO-1 →LUMO (32.9)<br>HOMO-1 →LUMO+1 (3.7) | 0.4813             |
| T <sub>3</sub> | 3.1769 | 390.27 | HOMO-3 →LUMO (9.7)<br>HOMO-2 →LUMO (15.2)<br>HOMO-1 →LUMO+3 (4.6)   | 0.6249             |
| T <sub>4</sub> | 3.3295 | 372.38 | HOMO-5 →LUMO (4.5)<br>HOMO →LUMO (5.3)<br>HOMO →LUMO+1 (17.7)       | 0.5492             |
| T <sub>5</sub> | 3.6077 | 343.66 | HOMO-4 →LUMO+3 (1.5)<br>HOMO-3 →LUMO (24.8)                         | 0.2841             |

**Table S17:** Computed triplet vertical transitions involved in **2** calculated through TD-DFT calculation are done using 6-31G (d) basis set B3LYP functional in Gaussian09 in the gas phase.

| Excited State  | E (eV) | E (nm) | Dominant transitions (%)                                            | $\Delta E_{S1-Tn}$ |
|----------------|--------|--------|---------------------------------------------------------------------|--------------------|
| T <sub>1</sub> | 2.3885 | 519.08 | HOMO →LUMO (38.9)<br>HOMO →LUMO +1 (4.4)                            | 0.8306             |
| T <sub>2</sub> | 3.1377 | 395.15 | HOMO-3 →LUMO+1 (7)<br>HOMO-2 →LUMO (2.2)<br>HOMO →LUMO+1 (25.4)     | 0.4553             |
| T <sub>3</sub> | 3.1614 | 392.18 | HOMO-2 →LUMO +2 (2.8)<br>HOMO-1 →LUMO (34.4)                        | 0.5502             |
| T <sub>4</sub> | 3.2362 | 383.11 | HOMO-4 →LUMO (10.8)<br>HOMO-2 →LUMO (13.9)<br>HOMO -1 →LUMO+2 (6.1) | 0.5358             |
| T <sub>5</sub> | 3.3113 | 374.42 | HOMO-3 →LUMO (22.6)<br>HOMO-3 →LUMO+1 (3.7)<br>HOMO-2 →LUMO (7.1)   | 0.5537             |

## Supplementary information

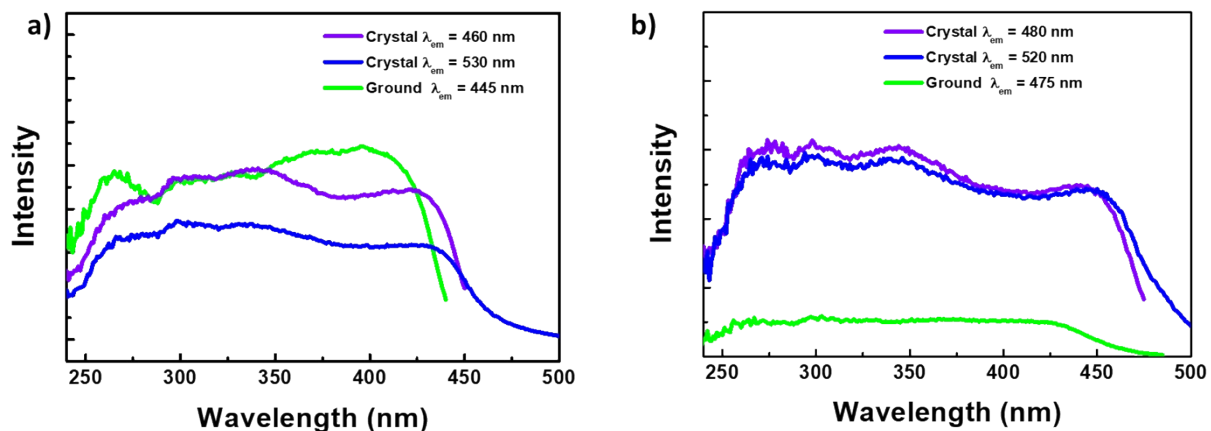

**Figure S64.** Excitation spectra correspond to crystal and ground emission maxima for (a) **1** and (b) **2** at 298 K under ambient conditions.

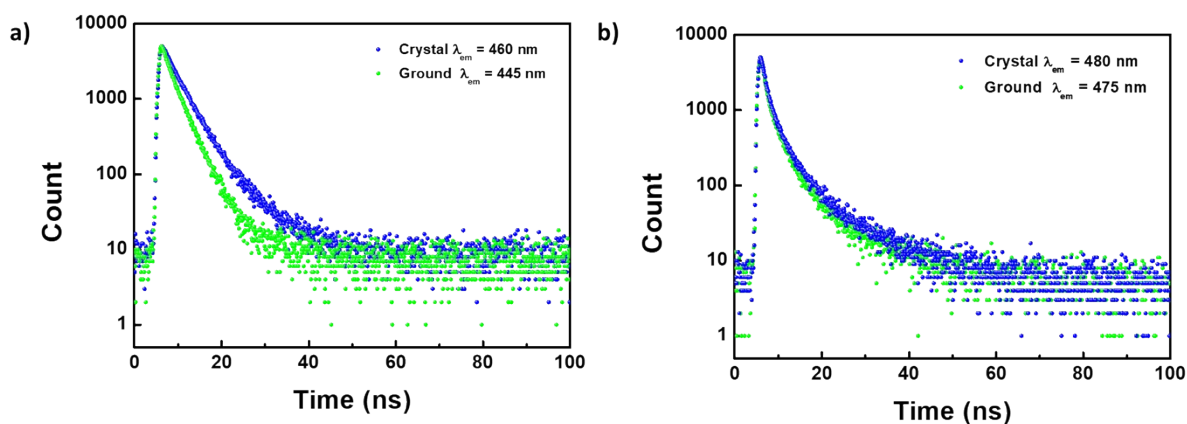

**Figure S65.** (a) Fluorescence lifetime decay for crystal and ground (a) **1** and (b) **2** at 298 K under ambient conditions at  $\lambda_{ex} = 375$  nm

## Supplementary information

**Table S18:** Fluorescence lifetime of crystal and ground for **1** and **2** under ambient conditions upon  $\lambda_{\text{ex}} = 375 \text{ nm}$  at 298 K.

|                | <b>1</b>                      |                                  |                               |                                            | <b>2</b>                      |                                  |                               |                                         |
|----------------|-------------------------------|----------------------------------|-------------------------------|--------------------------------------------|-------------------------------|----------------------------------|-------------------------------|-----------------------------------------|
|                | $\lambda_{\text{em}}$<br>(nm) | $\tau_1$ ( $A_1$<br>[%])<br>(ns) | $\tau_2$ ( $A_2$ [%])<br>(ns) | $\tau_{\text{av, p}} /$<br>ns <sup>b</sup> | $\lambda_{\text{em}}$<br>(nm) | $\tau_1$<br>( $A_1$ [%])<br>(ns) | $\tau_2$ ( $A_2$ [%])<br>(ns) | $\tau_{\text{av, p}} /$ ns <sup>b</sup> |
| <b>Crystal</b> | 460                           | 2.33<br>(90.05)                  | 10.10<br>(9.95)               | 3.11                                       | 490                           | 1.73<br>(57.76)                  | 8.34<br>(42.24)               | 4.51                                    |
|                | 530                           | 11.55<br>(64.31)                 | 31.64<br>(35.69)              | 19.59                                      | 526                           | 4.47<br>(57.50)                  | 14.86<br>(42.50)              | 8.83                                    |
| <b>Ground</b>  | 453                           | 2.48<br>(73.76)                  | 4.81<br>(26.24)               | 3.09                                       | 480                           | 2.35<br>(62.96)                  | 9.95<br>(37.04)               | 5.16                                    |

## Supplementary information

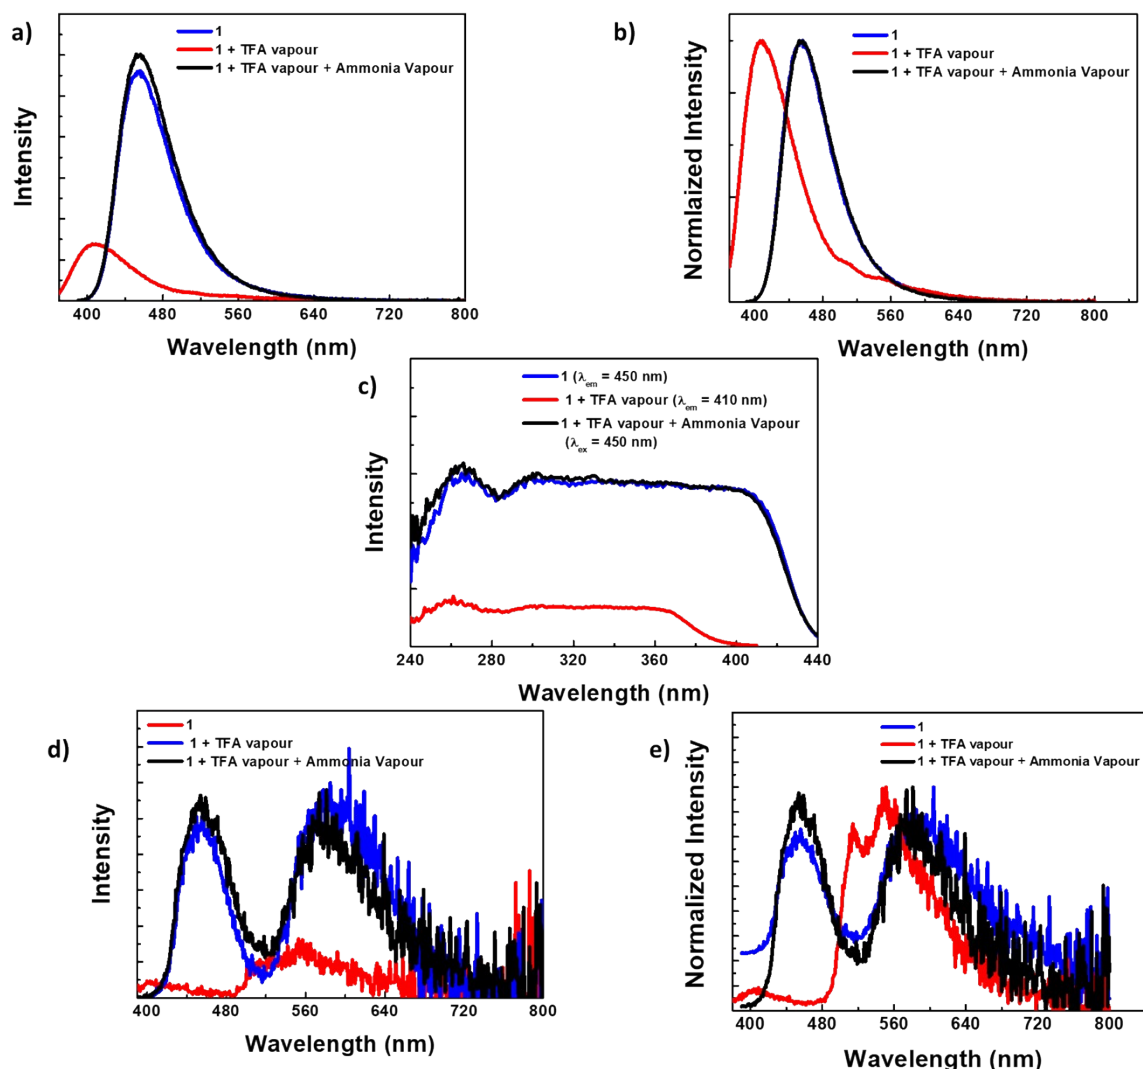

**Figure S66.** (a,b) Photoluminescence spectra at  $\lambda_{ex} = 380$  nm (c) excitation spectra corresponding to emission maxima (d,e) Time gated spectra at  $\lambda_{ex} = 380$  nm for doped film of **1** (1 wt% in PMMA), **1+ TFA Vapor** (1 after exposing to TFA Vapor) and **1+ TFA Vapor + Ammonia vapor** (1 after exposing to TFA Vapor flowed by exposing to ammonia vapor) under vacuum at 298 K.



## Supplementary information

**Table S19:** Fluorescence and Phosphorescence lifetime for **1**, **1+ TFA Vapour**, and **1+ TFA Vapour + Ammonia vapor** doped in PMMA film matrix (1 wt%) upon  $\lambda_{ex} = 375$  nm at 298 K under vacuum.

|                                | Fluorescence (ns)      |                               |                               |                    | Phosphorescence (ms)   |                               |                               |                    |
|--------------------------------|------------------------|-------------------------------|-------------------------------|--------------------|------------------------|-------------------------------|-------------------------------|--------------------|
|                                | $\lambda_{em}$<br>(nm) | $\tau_1$ ( $A_1$ [%])<br>(ns) | $\tau_2$ ( $A_2$ [%])<br>(ns) | $\tau_{avg}$<br>ns | $\lambda_{em}$<br>(nm) | $\tau_1$ ( $A_1$ [%])<br>(ms) | $\tau_2$ ( $A_2$ [%])<br>(ms) | $\tau_{avg}$<br>ms |
| <b>1</b>                       | 450                    | 3.20<br>(46.29)               | 7.18 ns<br>(53.71)            | 5.35               | 580                    | 92.12<br>(31.86)              | 203.80<br>(68.14)             | 168.06             |
| <b>1+TFA</b>                   | 400                    | 2.50<br>(85.37)               | 2.50<br>(85.37)               | 3.09               | 550                    | 16.7<br>(60.26)               | 79.90<br>(39.74)              | 41.98              |
|                                |                        |                               |                               |                    | 515                    | 13.56<br>(57.83)              | 63.26<br>(42.17)              | 34.43              |
| <b>1+TFA<br/>+<br/>Ammonia</b> | 450                    | 3.24<br>(46.21)               | 7.48<br>(53.79)               | 5.53               | 580                    | 63.96<br>(25.78)              | 193.06<br>(74.22)             | 159.49             |

## Supplementary information

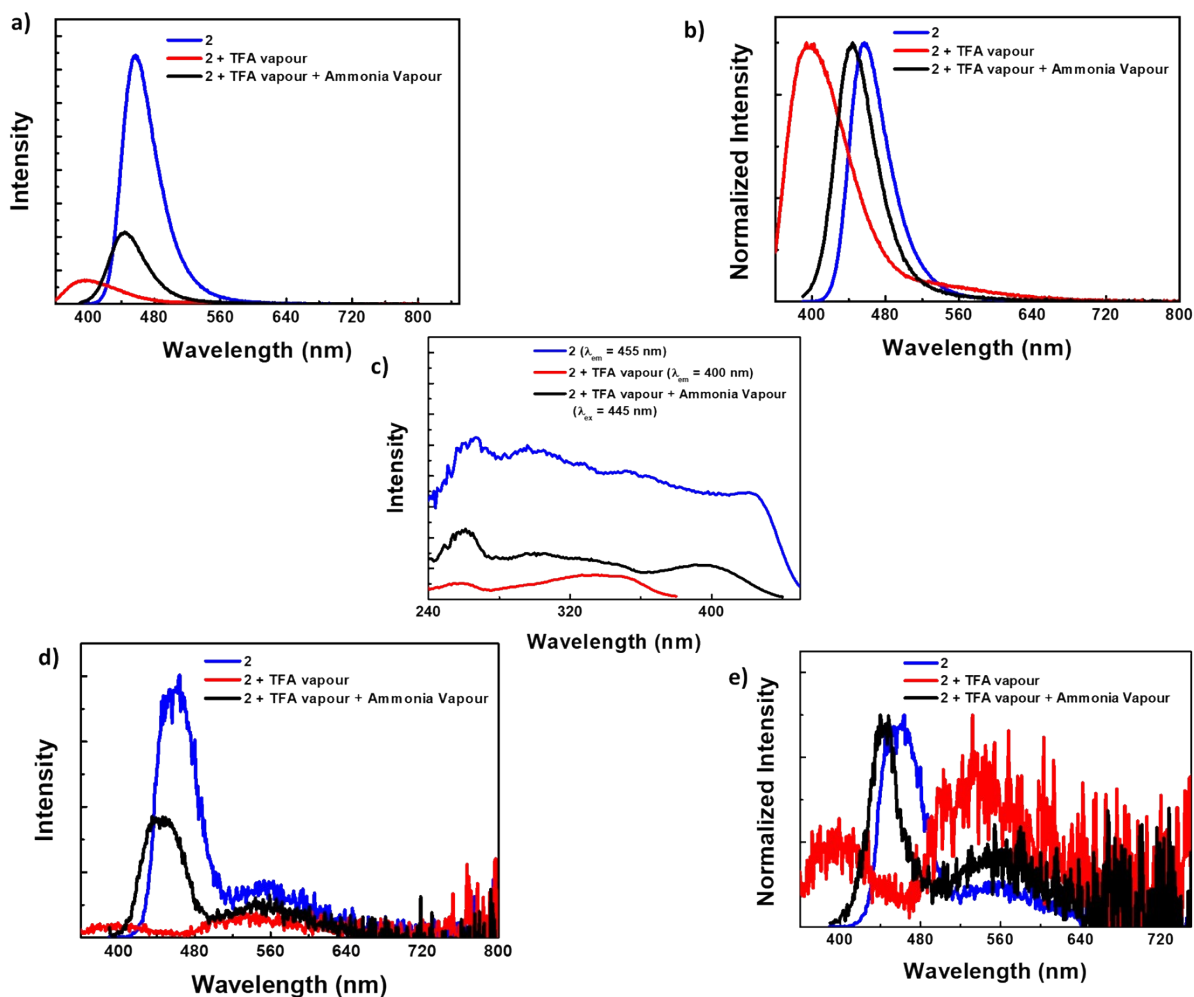

**Figure S67.** (a,b) Photoluminescence spectra at  $\lambda_{ex} = 380$  nm (c) excitation spectra corresponding to emission maxima (d,e) time-gated spectra at  $\lambda_{ex} = 380$  nm for doped film of **2** (1 wt% in PMMA), **2+ TFA Vapor** (1 after exposing to TFA Vapor) and **2+ TFA Vapor + Ammonia vapor** (1 after exposing to TFA Vapor flowed by exposing to ammonia vapor) under vacuum at 298 K.

## Supplementary information

**Table S20:** Fluorescence and Phosphorescence lifetime for **2**, **2+ TFA Vapour**, and **2+ TFA Vapour + Ammonia vapor** doped in PMMA film matrix (1 wt%) upon  $\lambda_{ex} = 375$  nm at 298 K. at 298 K under vacuum.

|                        | Fluorescence        |                                    |                                    |                 | Phosphorescence     |                                    |                                    |                 |
|------------------------|---------------------|------------------------------------|------------------------------------|-----------------|---------------------|------------------------------------|------------------------------------|-----------------|
|                        | $\lambda_{em}$ (nm) | $\tau_1$ (A <sub>1</sub> [%]) (ns) | $\tau_2$ (A <sub>2</sub> [%]) (ns) | $\tau_{avg}$ ns | $\lambda_{em}$ (nm) | $\tau_1$ (A <sub>1</sub> [%]) (ms) | $\tau_2$ (A <sub>2</sub> [%]) (ms) | $\tau_{avg}$ ms |
| <b>2</b>               | 455                 | 3.88 (95.61)                       | 13.98 (4.39)                       | 4.32            | 550                 | 10.92 (29.60)                      | 179.98 (70.40)                     | 129.93          |
| <b>2+TFA</b>           | 400                 | 2.37 (71.67)                       | 7.77 (28.33)                       | 3.88            | 550                 | 2.40 (31.77)                       | 17.44 (68.23)                      | 12.66           |
| <b>2+TFA + Ammonia</b> | 455                 | 3.51 (84.22)                       | 12.50 (15.78)                      | 4.93            | 550                 | 3.16 (26.39)                       | 40.29 ms (73.61)                   | 30.49           |

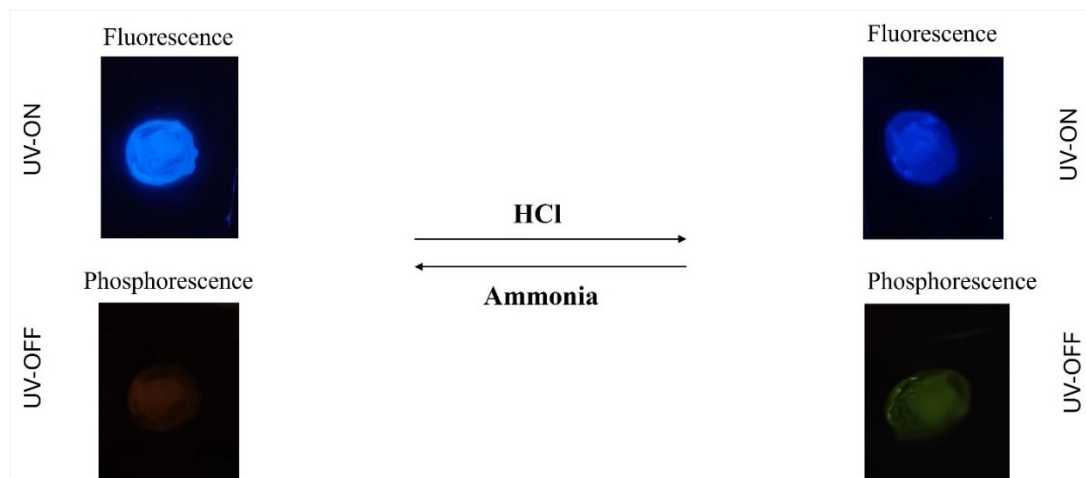

**Figure S68.** (a) Photographs of compounds before and after UV light ( $\lambda_{ex} = 365$  nm) of **1** doped PMMA film (1 wt%).

## Supplementary information

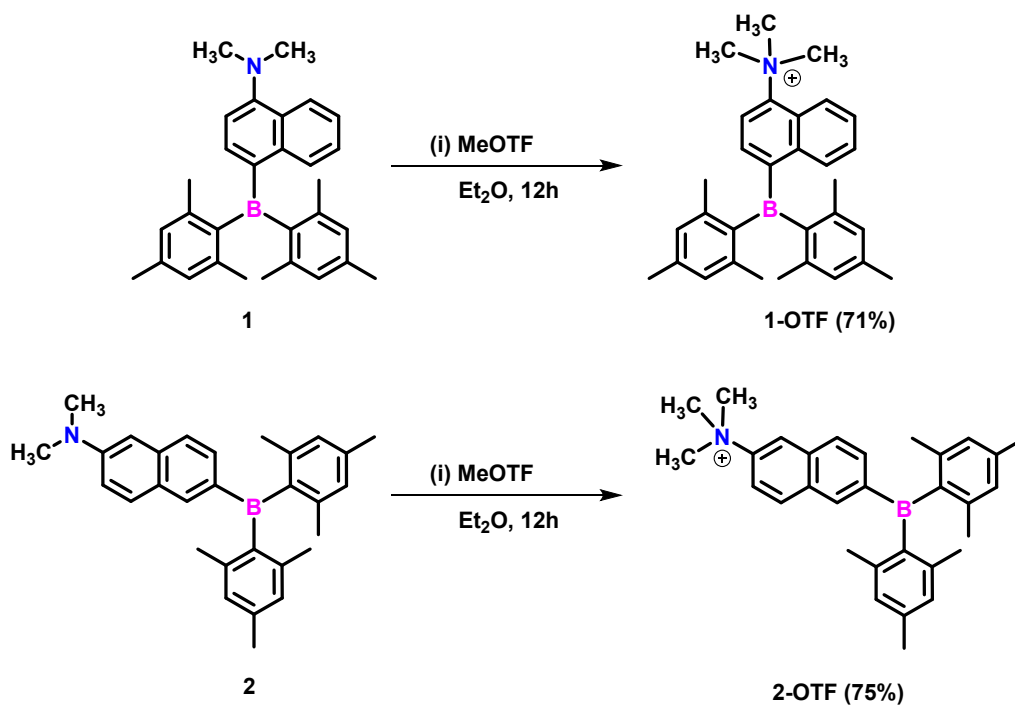

**Scheme S2.** Synthesis of precursor compounds **1-OTF** and **2-OTF**

### General synthetic approach for 1-OTF and -2-OTF.

The MeOTf (0.894 mmol, in diethyl ether solvent) was added to a diethyl ether solution of **1** / **2** (0.596 mmol) at room temperature. The reaction mixture was allowed to stir for an additional 12h at the same temperature. The mother extract was decanted. The precipitate was dried up, and washed with *n*-pentane (20 mL) afforded the pure ammonium borane salts **1-OTF/2-OTF**. The X-ray quality crystals for **1-OTF** were obtained from the concentrated tetrahydrofuran solution kept at -30 °C.

### Synthesis of 1-OTF.

**1** (250 mg, 0.596 mmol), MeOTf (146.7 mg, 97.8  $\mu$ L 0.894 mmol) Yield: 71 % (248 mg). <sup>1</sup>H NMR (300 MHz, CDCl<sub>3</sub>):  $\delta$  8.34 (d, *J* = 8.25 Hz 1H), 8.11 (d, *J* = 8.14 Hz, 1H), 7.82-7.77 (m, 2H), 7.51-7.44 (m, 2H), 6.79 (s, 4H), 4.11(s,9H), 2.29 (s, 6H), 1.90 (s, 12H); <sup>13</sup>C NMR (75 MHz, CDCl<sub>3</sub>):  $\delta$  143.14, 140.57, 140.21, 138.31, 131.44, 130.76, 128.53, 127.26, 123.16, 122.82, 122.55, 118.01, 58.21, 23.24, 21.29; <sup>19</sup>F NMR (282 MHz, CDCl<sub>3</sub>):  $\delta$  -78.39.

## Supplementary information

### Synthesis of 2-OTf.

**2** (250 mg, 0.596 mmol), MeOTf (146.7 mg, 97.8  $\mu$ L 0.894 mmol). Yield: 75 % (262 mg).  $^1\text{H}$  NMR (300 MHz,  $\text{CDCl}_3$ ):  $\delta$  8.27 (s, 1H), 8.26-7.97 (m, 3H), 7.87 (d,  $J = 8.37$ , 1H), 7.72 (d,  $J = 7.20$ , 1H), 6.84 (s, 4H), 3.84 (s, 9H), 2.33 (s, 6H), 1.97 (s, 12H);  $^{13}\text{C}$  NMR (75 MHz,  $\text{CDCl}_3$ ):  $\delta$  146.82, 144.99, 141.42, 140.87, 139.32, 136.51, 134.40, 134.17, 133.05, 132.74, 128.53, 128.43, 122.84, 118.60, 118.45, 116.45, 57.29, 23.47, 21.27;  $^{19}\text{F}$  NMR (282 MHz,  $\text{CDCl}_3$ ):  $\delta$  -78.41.

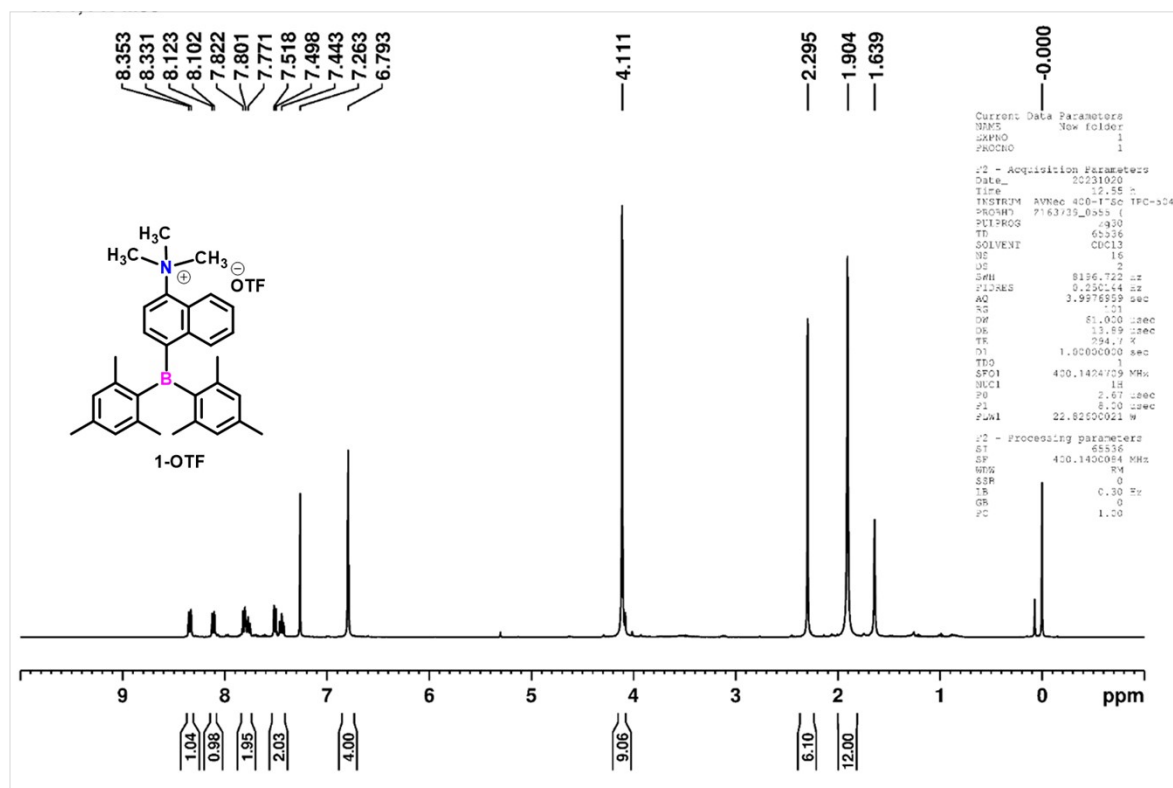

Figure S69.  $^1\text{H}$  NMR spectrum of 1-OTf in  $\text{CDCl}_3$ .

## Supplementary information

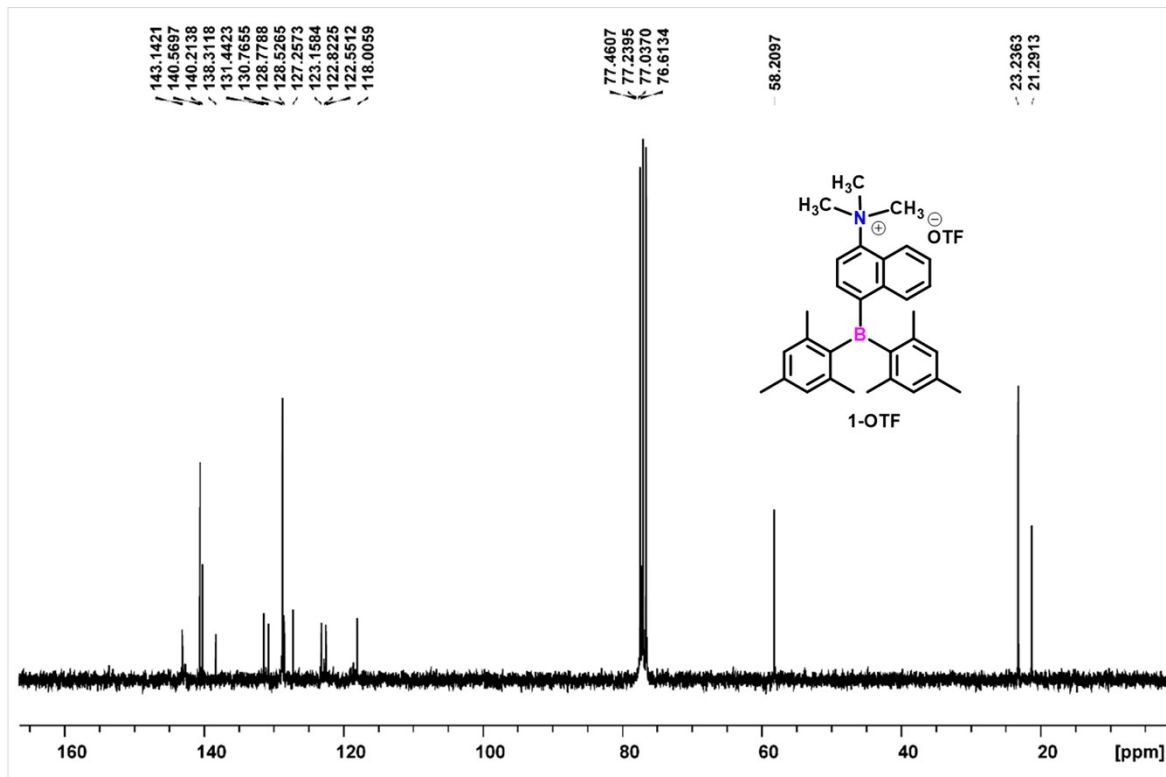

Figure. S70. <sup>13</sup>C NMR spectrum of 2-OTF in CDCl<sub>3</sub>.

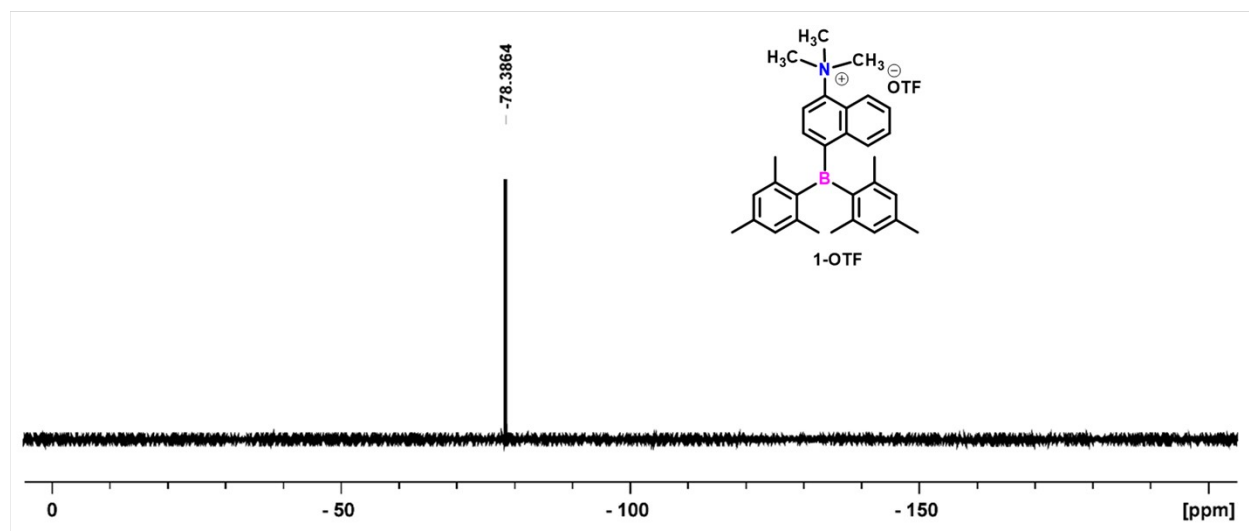

Figure S71. <sup>19</sup>F NMR spectrum of 1-OTF in CDCl<sub>3</sub>.

# Supplementary information

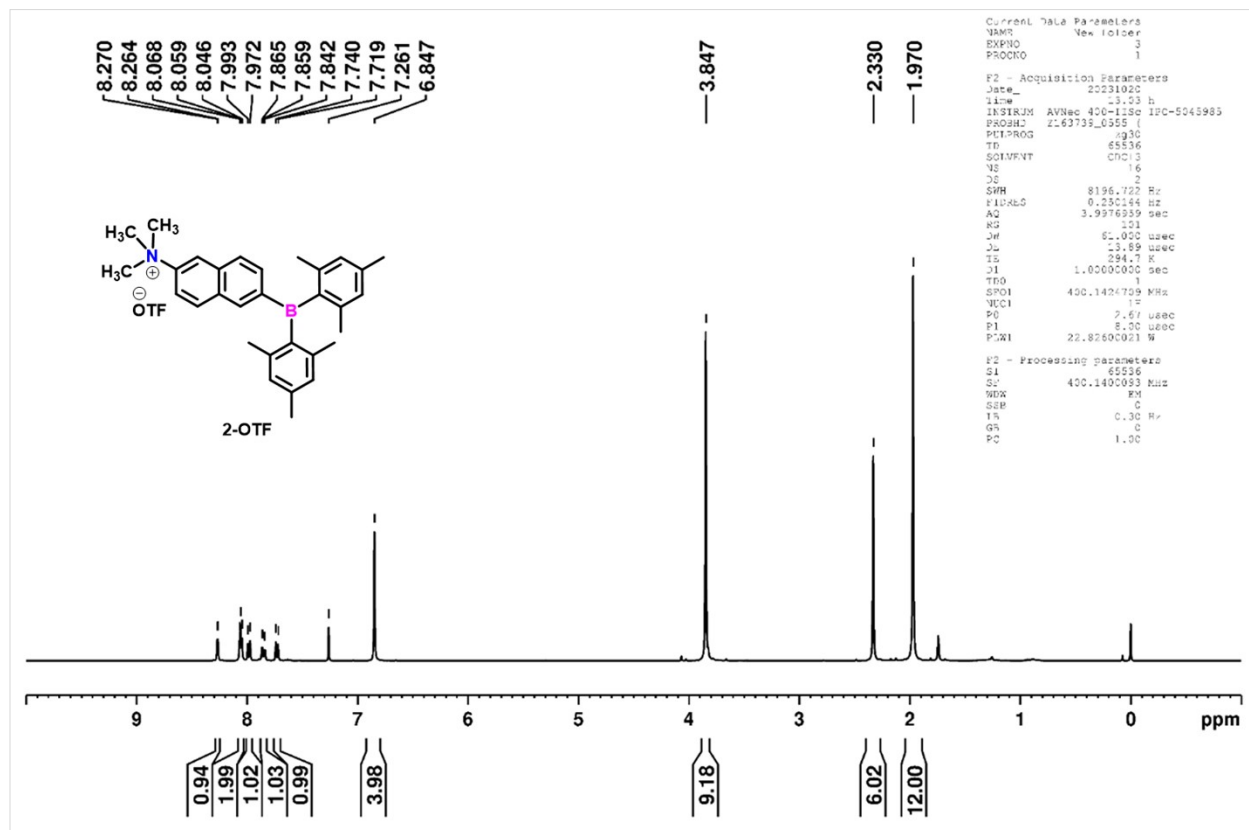

Figure S72.  $^1\text{H}$  NMR spectrum of 2-OTF in  $\text{CDCl}_3$ .

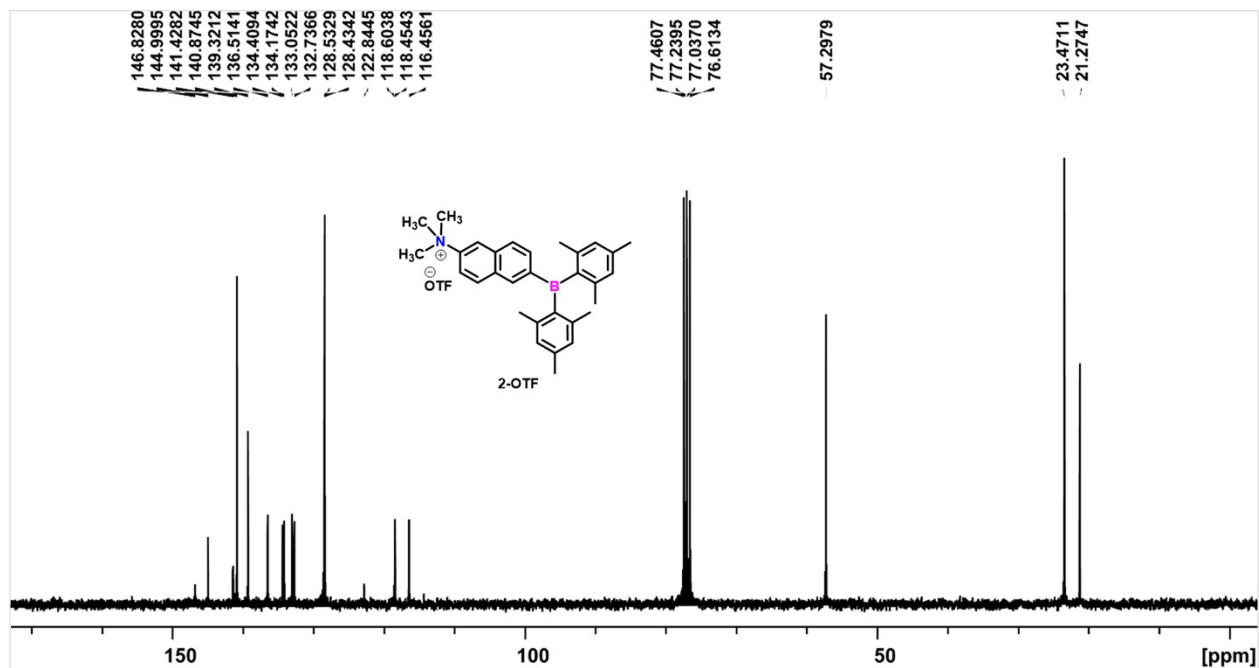

Figure S73.  $^{13}\text{C}$  NMR spectrum of 2-OTF in  $\text{CDCl}_3$ .

## Supplementary information

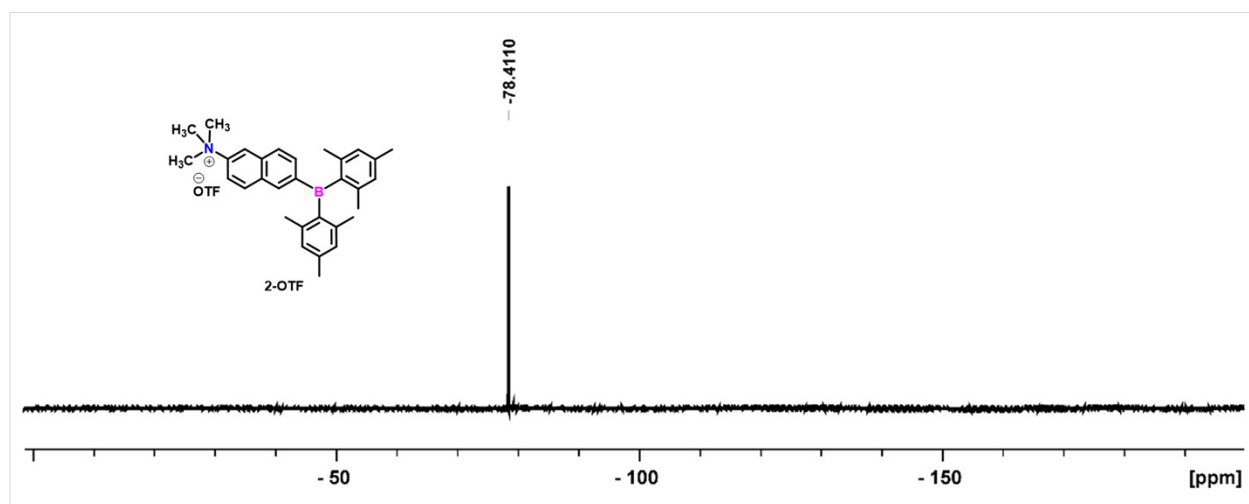

Figure S74.  $^{19}\text{F}$  NMR spectrum of 2-OTF in  $\text{CDCl}_3$ .



## Supplementary information

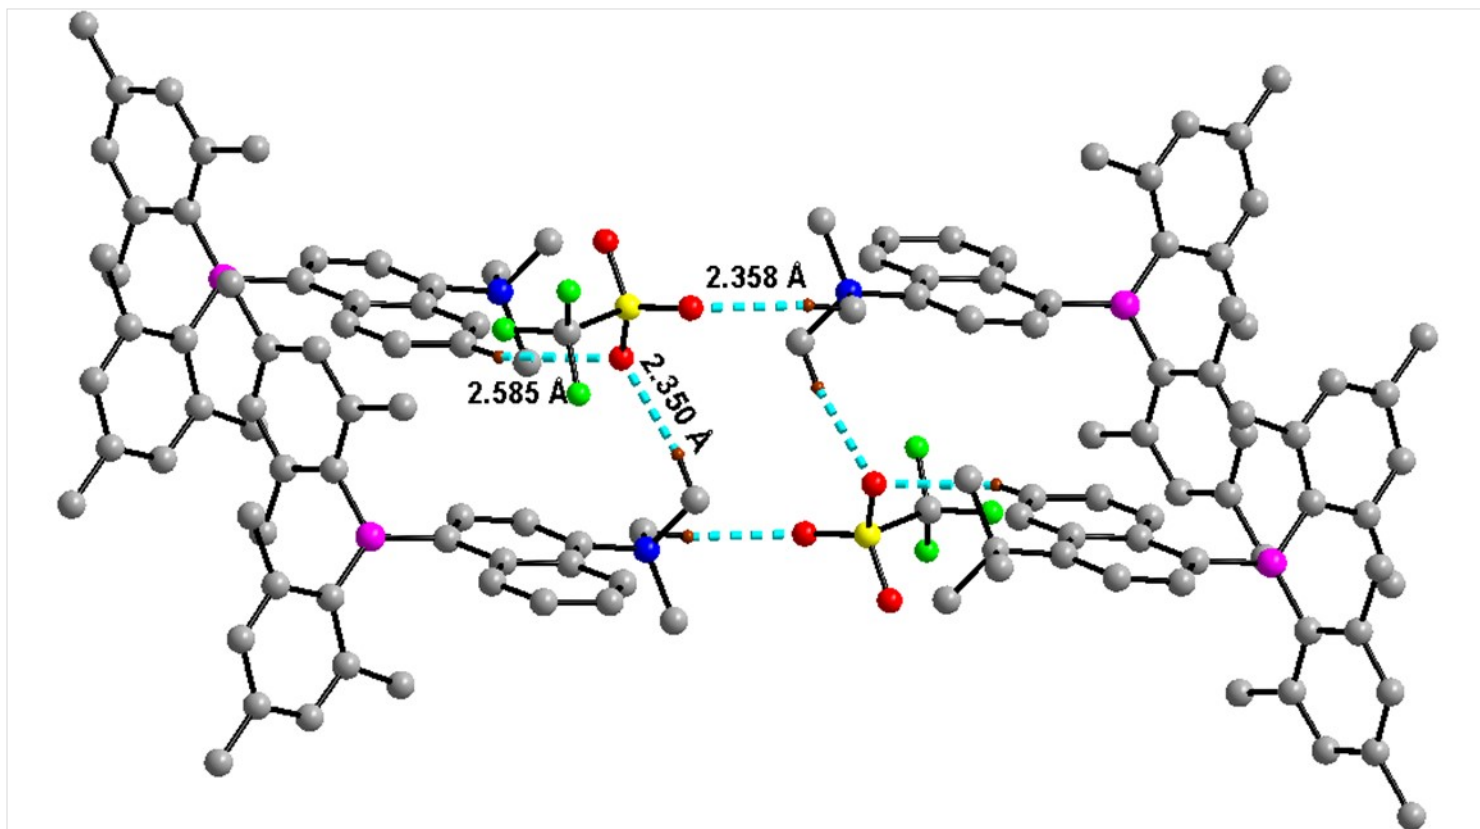

**Figure S75.** O...H (turquoise line) intermolecular interactions in **1-OTF** which extended in one direction and formed a 1D chain. Hydrogen atoms are omitted for clarity. Color code: carbon (gray 50), boron (magenta), nitrogen (blue), oxygen (red), sulfur (yellow) and fluorine ( bright green)

## Supplementary information

**Table S21.** Crystallographic data and refinement parameters for **1-OTF**

|                                                         | <b>1-OTF</b>                       |
|---------------------------------------------------------|------------------------------------|
| Empirical formula                                       | $C_{34} H_{41} B Cl_4 F_3 N O_3 S$ |
| FW                                                      | 753.35                             |
| T (K)                                                   | 100 K                              |
| Crystal system                                          | Monoclinic                         |
| Space group                                             | <i>I</i> 2/ <i>a</i>               |
| <i>a</i> /Å                                             | 17.9022(7)                         |
| <i>b</i> /Å                                             | 8.3999(3)                          |
| <i>c</i> /Å                                             | 47.9410(16)                        |
| $\alpha$ /deg                                           | 90                                 |
| $\beta$ /deg                                            | 95                                 |
| $\gamma$ /deg                                           | 90                                 |
| <i>V</i> /Å <sup>3</sup>                                | 7184.0 (5)                         |
| <i>Z</i>                                                | 4                                  |
| $\rho_{\text{calcd}}$ (gcm <sup>-3</sup> )              | 1.393                              |
| $\mu$ (Mo K $\alpha$ ) (mm <sup>-1</sup> )              | 0.439                              |
| $\lambda$ /Å                                            | 0.71073                            |
| F (000)                                                 | 3136                               |
| Collected reflections                                   | 10077                              |
| Unique reflections                                      | 7829                               |
| Goodness of Fit (GOF) [F2]                              | 1.026                              |
| R1 [ <i>I</i> >2 $\sigma$ ( <i>I</i> )] <sup>[a]</sup>  | 0.0764                             |
| wR2 [ <i>I</i> >2 $\sigma$ ( <i>I</i> )] <sup>[b]</sup> | 0.2146                             |
| CCDC Number                                             | <b>2291487</b>                     |

## Supplementary information

**Table S22:** Comparison of different parameters for **1-OTF** and **2-OTF** obtained from crystal data and ground state optimized geometry through DFT calculation using 6-31G (d)/B3LYP level of theory

| Parameter                      | 1-OTF                          |          | 2-OTF                          |         |
|--------------------------------|--------------------------------|----------|--------------------------------|---------|
|                                | ground state (S <sub>0</sub> ) | Crystal  | ground state (S <sub>0</sub> ) | Crystal |
| <b>HOMO (eV)</b>               | -5.90                          | -        | -5.96                          | -       |
| <b>LUMO (eV)</b>               | -2.32                          | -        | -2.30                          | -       |
| <b>Bang gab (eV)</b>           | 3.58                           | -        | 3.66                           | -       |
| <b>Dipole moment (D)</b>       | 14.91                          | -        | 15.25                          | -       |
| <b>Σ<sub>(C-B-C)</sub> (°)</b> | 359.9                          | 359.8    | 360                            | -       |
| <b>B-C (Å)</b>                 | 1.590                          | 1.583(3) | 1.578                          | -       |
| <b>N-C (Å)</b>                 | 1.521                          | 1.511(3) | 1.510                          | -       |
| <b>θ<sub>D-A</sub> (°)</b>     | 77.34                          | 76.14    | 89.11                          | -       |
| <b>θ<sub>S-A</sub> (°)</b>     | 43.65                          | 49.95    | 27.13                          | -       |
| <b>θ<sub>D-S</sub> (°)</b>     | 85.59                          | 87.15    | 87.97                          | -       |

## Supplementary information

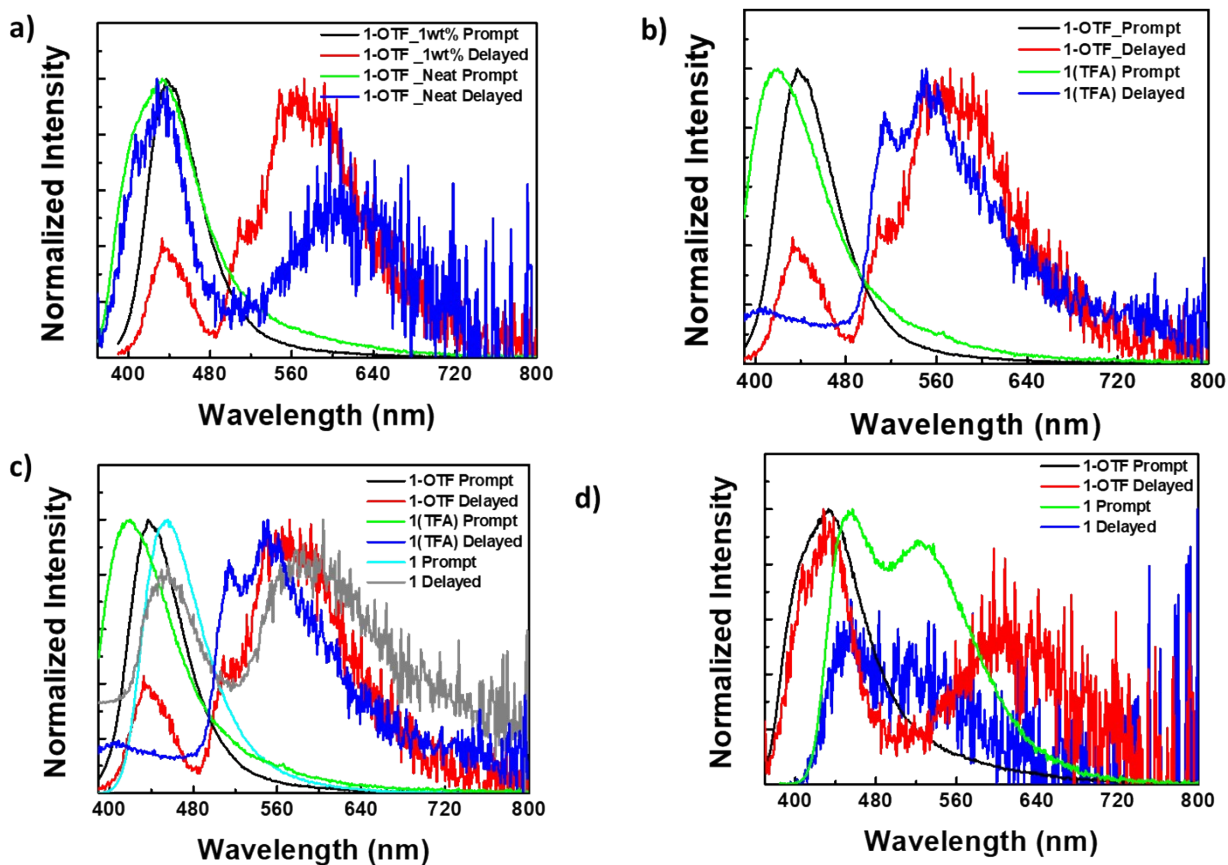

**Figure S76.** Prompt and delayed spectra for (a) **1-OTF** doped in PMMA matrix (1 wt%) neat film [ $\lambda_{ex} = 360$  nm], (b) **1-OTF and 1 (exposed to TFA)** doped in PMMA matrix (1 wt%) [ $\lambda_{ex} = 380$  nm], (c) **1-OTF, 1 and 1 after exposed to TFA** in PMMA matrix (1 wt%) [ $\lambda_{ex} = 380$  nm] (d) **1-OTF, 1 and 1 after exposed to TFA** in neat film [ $\lambda_{ex} = 360$  nm and 380 nm respectively] under vacuum [absence of oxygen]

## Supplementary information

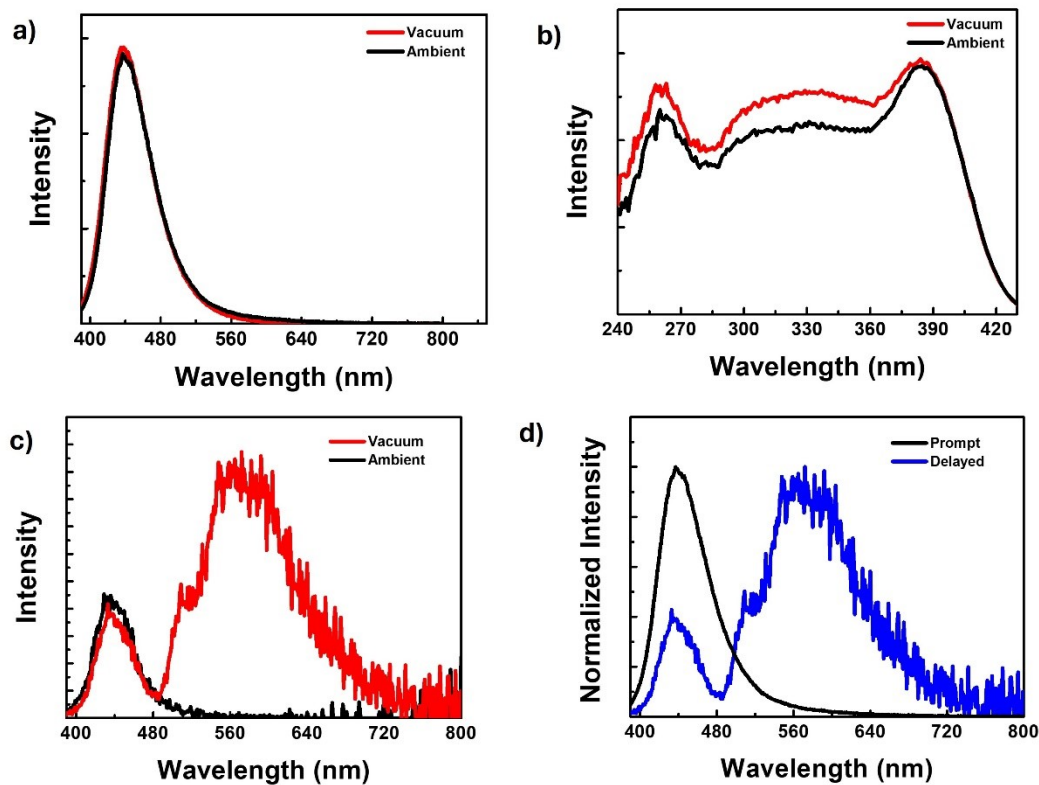

**Figure S77.** (a) Fluorescence spectra (b) excitation spectra corresponding to emission maxima (c) delayed fluorescence spectra [50  $\mu$ s delay] under vacuum [absence of oxygen] and ambient atmosphere [presence of oxygen] at 298 K for **1-OTF** doped in PMMA matrix (1 wt%) [ $\lambda_{\text{ex}} = 380$  nm]. (d) Prompt and delayed spectra for **1-OTF** doped in PMMA matrix (1 wt%) [ $\lambda_{\text{ex}} = 380$  nm] under vacuum [absence of oxygen].

## Supplementary information

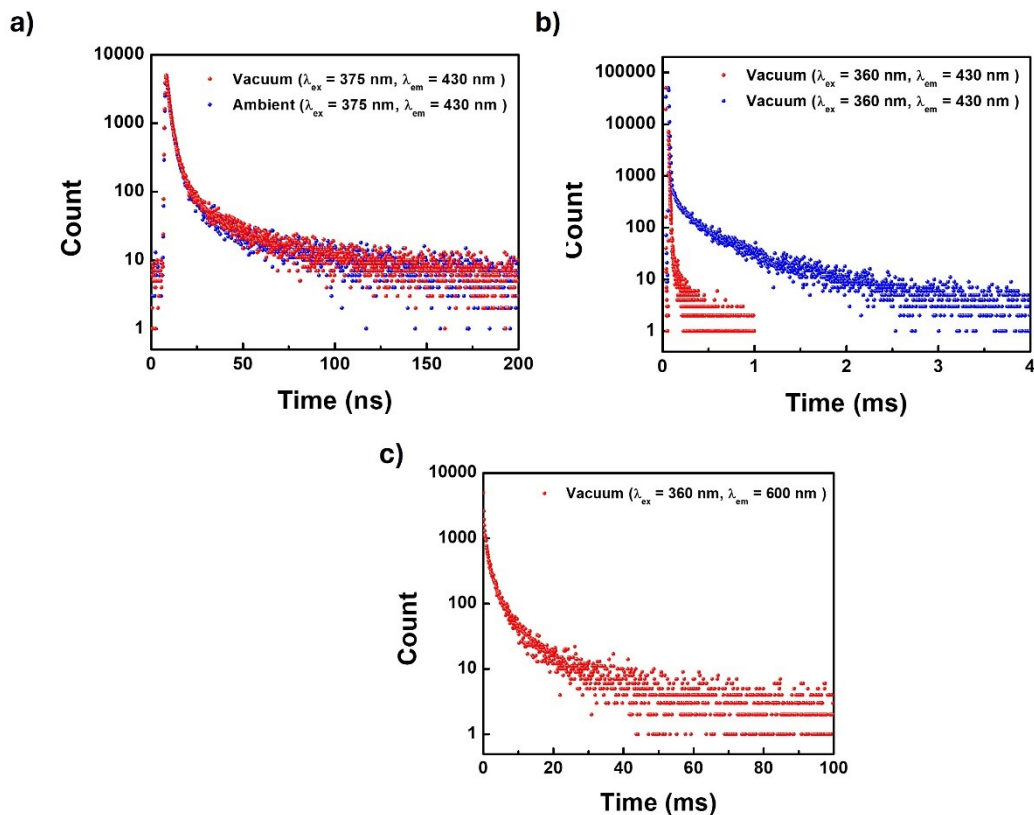

**Figure S78.** (a) fluorescence lifetime decay [ $\lambda_{ex} = 375$  nm and  $\lambda_{em} = 430$  nm], (b) delayed fluorescence lifetime decay [ $\lambda_{ex} = 380$  nm and  $\lambda_{em} = 430$  nm] and (c) phosphorescence lifetime decay [ $\lambda_{ex} = 380$  nm and  $\lambda_{em} = 600$  nm] under vacuum [absence of oxygen] and ambient atmosphere [presence of oxygen] at 298 K for **1-OTF** doped in PMMA matrix (1 wt%) [ $\lambda_{ex} = 380$  nm].

## Supplementary information

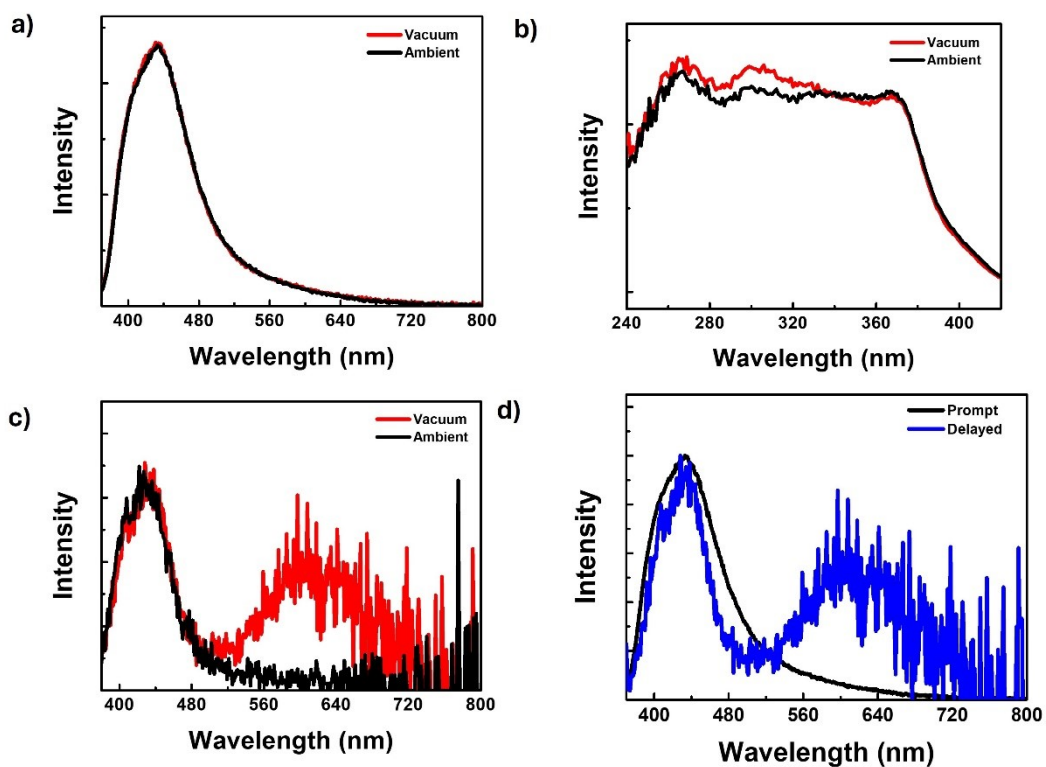

**Figure S79.** (a) Fluorescence spectra (b) excitation spectra corresponding to emission maxima (c) delayed fluorescence spectra [50  $\mu$ s delay] under vacuum [absence of oxygen] and ambient atmosphere [presence of oxygen] at 298 K for **1-OTF** in neat film [ $\lambda_{\text{ex}} = 380$  nm]. (d) Prompt and delayed spectra for **1-OTF** in neat film (1 wt%) [ $\lambda_{\text{ex}} = 380$  nm] under vacuum [absence of oxygen]

## Supplementary information

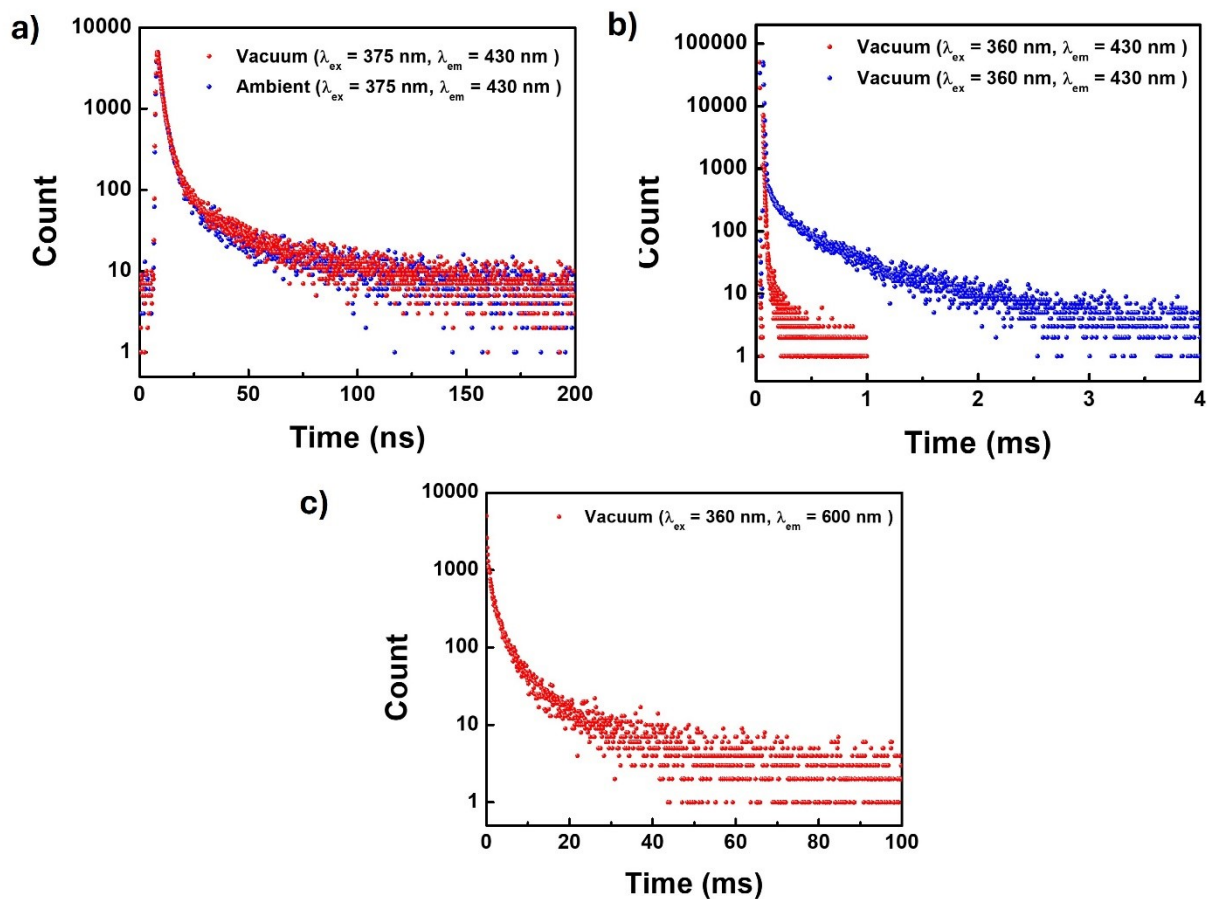

**Figure S80.** (a) fluorescence lifetime decay [ $\lambda_{ex} = 375$  nm and  $\lambda_{em} = 430$  nm] (b) delayed fluorescence lifetime decay [ $\lambda_{ex} = 380$  nm and  $\lambda_{em} = 430$  nm] (c) phosphorescence lifetime decay [ $\lambda_{ex} = 380$  nm and  $\lambda_{em} = 600$  nm] under vacuum [absence of oxygen] and ambient atmosphere [presence of oxygen] at 298 K for **1-OTF** in neat film [ $\lambda_{ex} = 380$  nm].



## Supplementary information

**Table S23:** Fluorescence, Delayed fluorescence and Phosphorescence lifetime for **1-OTF** in 1wt% doped film in PMMA and neat film at 298 K under vacuum.

|                  | Fluorescence (ns)             |                               |                                  |                                  | Delayed fluorescence ( $\mu$ s) |                               |                                  |                                  | Phosphorescence (ms)          |                               |                                  |                                  |
|------------------|-------------------------------|-------------------------------|----------------------------------|----------------------------------|---------------------------------|-------------------------------|----------------------------------|----------------------------------|-------------------------------|-------------------------------|----------------------------------|----------------------------------|
|                  | $\lambda_{\text{ex}}$<br>(nm) | $\lambda_{\text{em}}$<br>(nm) | $\tau_1$<br>(A <sub>1</sub> [%]) | $\tau_2$<br>(A <sub>2</sub> [%]) | $\lambda_{\text{ex}}$<br>(nm)   | $\lambda_{\text{em}}$<br>(nm) | $\tau_1$ (A <sub>1</sub><br>[%]) | $\tau_2$ (A <sub>2</sub><br>[%]) | $\lambda_{\text{ex}}$<br>(nm) | $\lambda_{\text{em}}$<br>(nm) | $\tau_1$<br>(A <sub>1</sub> [%]) | $\tau_2$<br>(A <sub>1</sub> [%]) |
| <b>1wt% PMMA</b> |                               |                               |                                  |                                  |                                 |                               |                                  |                                  |                               |                               |                                  |                                  |
| <b>vacuum</b>    | 375                           | 430                           | 3.74<br>(86.84)                  | 11.86<br>(13.15)                 | 380                             | 430                           | 6.13<br>(95.72)                  | 59.86<br>(4.28)                  | 380                           | 570                           | 91.41<br>(78.19)                 | 379.99<br>(21.87)                |
| <b>Ambi</b>      | 375                           | 430                           | 3.87<br>(88.45)                  | 11.53<br>(11.55)                 | 375                             | 430                           | 5.02<br>(82.90)                  | 12.04<br>(17.10)                 |                               |                               |                                  |                                  |
| <b>Neat</b>      |                               |                               |                                  |                                  |                                 |                               |                                  |                                  |                               |                               |                                  |                                  |
| <b>vacuum</b>    | 375                           | 430                           | 2.51<br>(67.40)                  | 26.25<br>(32.60)                 | 380                             | 430                           | 85.18<br>(30.88)                 | 564.86<br>(67.78)                | 380                           | 600                           | 1.05<br>(56.45)                  | 7.92<br>(43.55)                  |
| <b>Ambi</b>      | 375                           | 430                           | 2.16<br>(70.56)                  | 22.35<br>(29.44)                 | 375                             | 430                           | 5.60<br>(90.95)                  | 46.50<br>(9.05)                  |                               |                               |                                  |                                  |

## Supplementary information

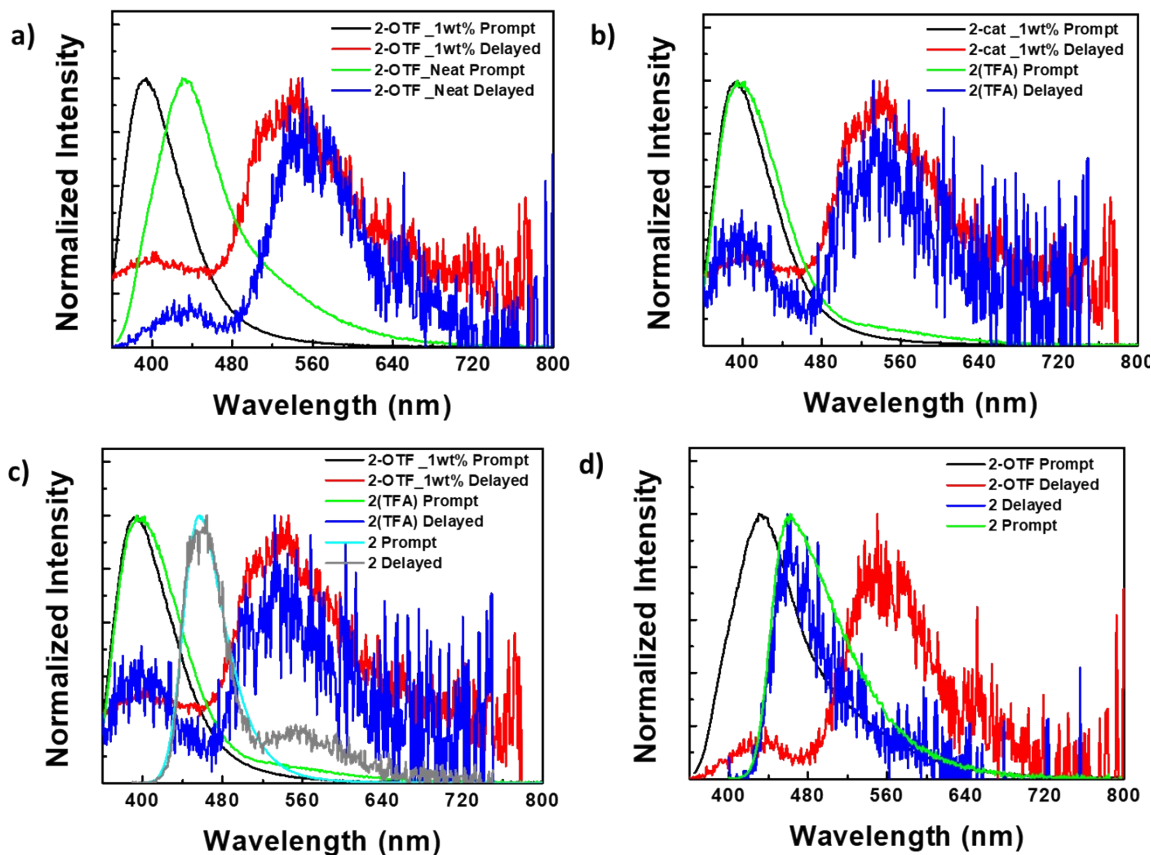

**Figure S81.** Prompt and delayed spectra for (a) **2-OTF** doped in PMMA matrix (1 wt%) neat film [ $\lambda_{\text{ex}} = 350$  nm], (b) **2-OTF** and **2** (exposed to TFA) doped in PMMA matrix (1 wt%) [ $\lambda_{\text{ex}} = 350$  nm], (c) **2-OTF**, **2** and **2** after exposed to TFA in PMMA matrix (1 wt%) [ $\lambda_{\text{ex}} = 350$  nm], (d) **2-OTF**, **2** and **2** after exposed to TFA in neat film [ $\lambda_{\text{ex}} = 350$  nm and 390 nm respectively] under vacuum [absence of oxygen]

## Supplementary information

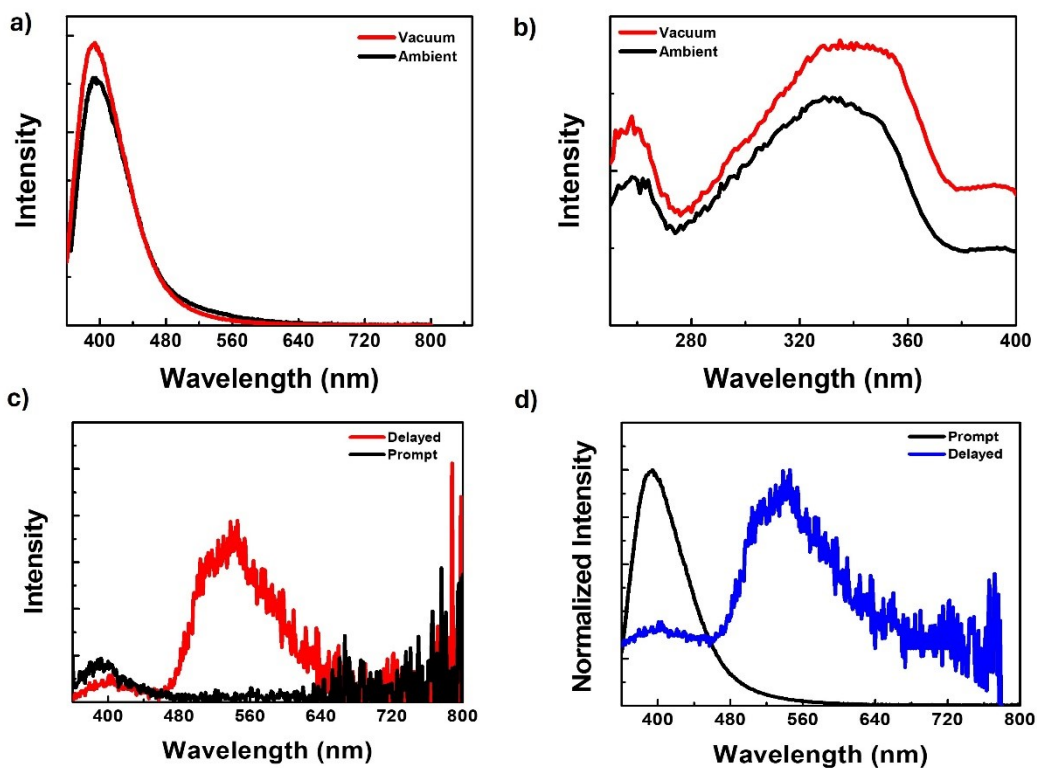

**Figure S82.** (a) Fluorescence spectra (b) excitation spectra corresponding to emission maxima (c) delayed fluorescence spectra [50  $\mu$ s delay] under vacuum [absence of oxygen] and ambient atmosphere [presence of oxygen] at 298 K for **2-OTF** doped in PMMA matrix (1 wt%) [ $\lambda_{\text{ex}} = 350$  nm] (d) Prompt and delayed spectra for **2-OTF** doped in PMMA matrix (1 wt%) [ $\lambda_{\text{ex}} = 350$  nm] under vacuum [absence of oxygen].

## Supplementary information

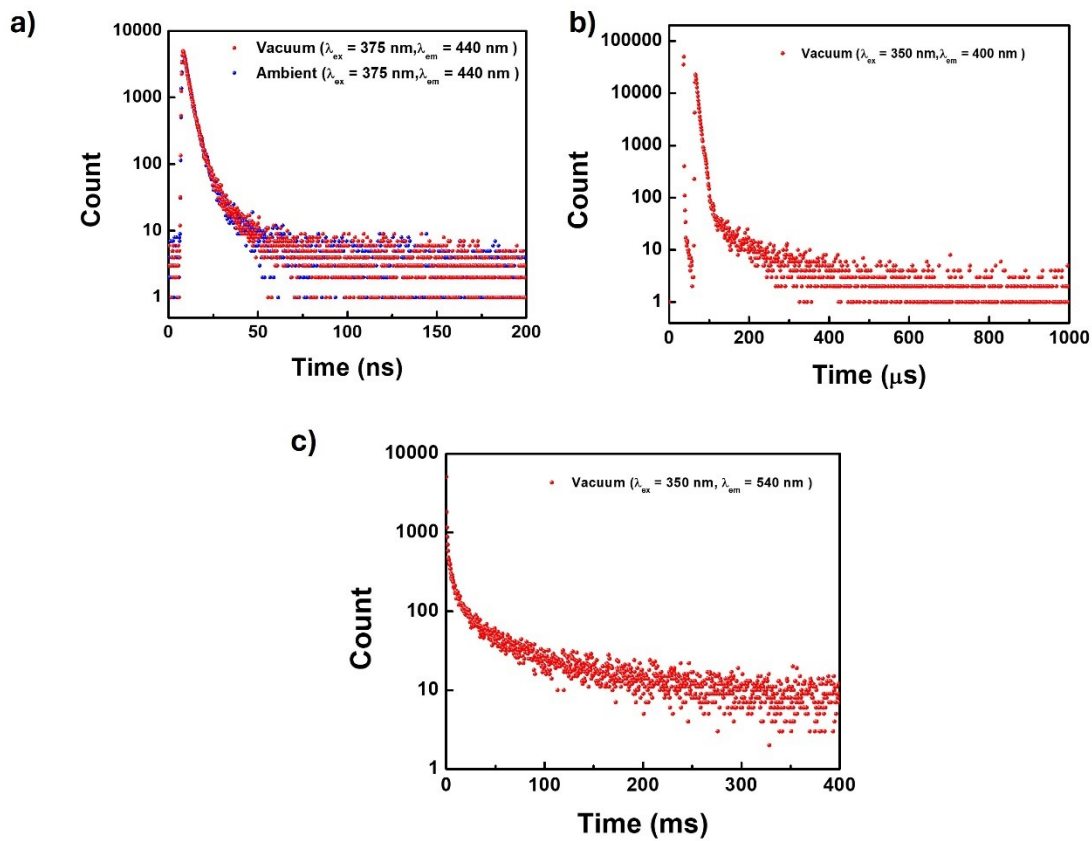

**Figure S83.** (a) fluorescence lifetime decay [ $\lambda_{ex} = 375$  nm and  $\lambda_{em} = 440$  nm] (b) delayed fluorescence lifetime decay [ $\lambda_{ex} = 350$  nm and  $\lambda_{em} = 400$  nm] (c) phosphorescence lifetime decay [ $\lambda_{ex} = 350$  nm and  $\lambda_{em} = 540$  nm] under vacuum [absence of oxygen] and ambient atmosphere [presence of oxygen] at 298 K for **2-OTF** doped in PMMA matrix (1 wt%) [ $\lambda_{ex} = 350$  nm].

## Supplementary information

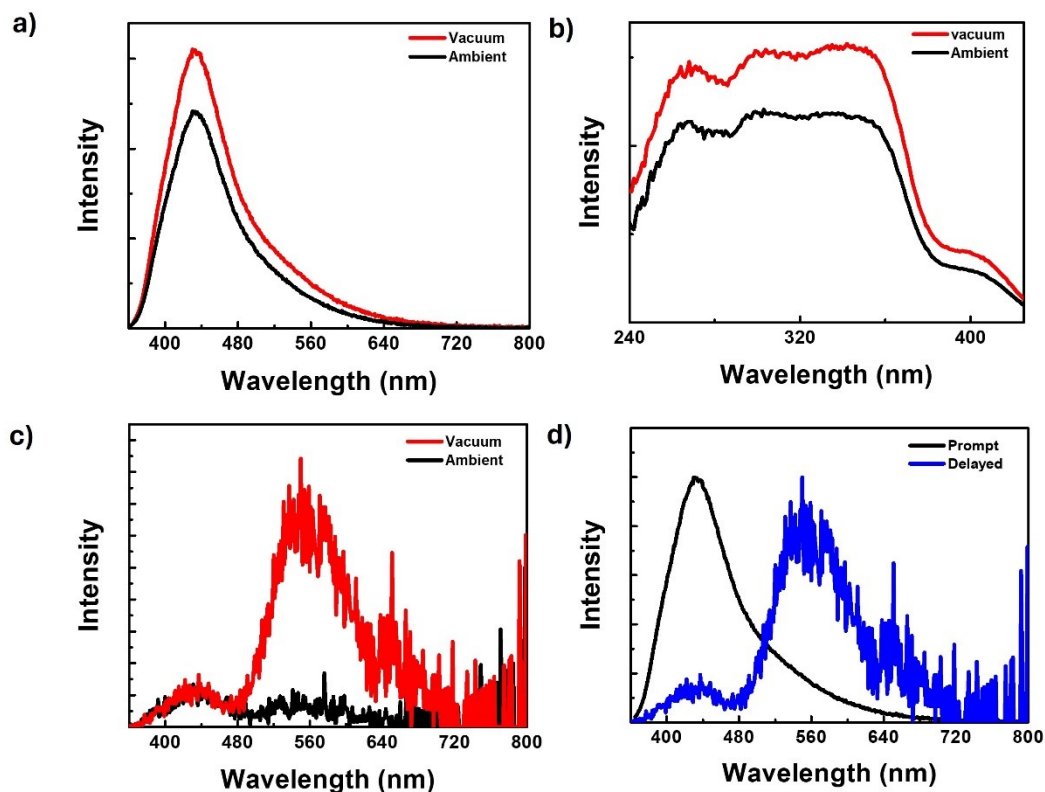

**Figure S84.** (a) Fluorescence spectra (b) excitation spectra corresponding to emission maxima (c) delayed fluorescence spectra [50  $\mu$ s delay] under vacuum [absence of oxygen] and ambient atmosphere [presence of oxygen] at 298 K for **2-OTF** in neat film [ $\lambda_{\text{ex}} = 380$  nm] (d) Prompt and delayed spectra for **2-OTF** in neat film (1 wt%) [ $\lambda_{\text{ex}} = 350$  nm] under vacuum [absence of oxygen].

## Supplementary information

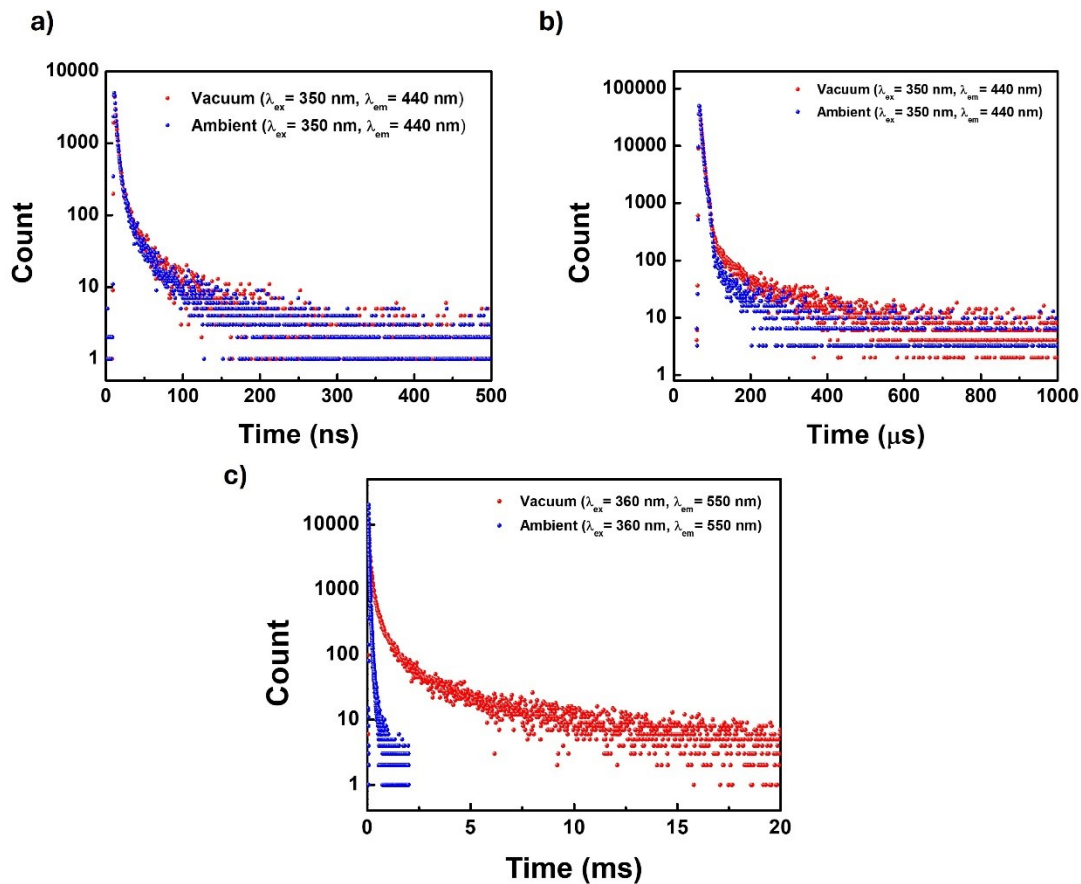

**Figure S85.** (a) fluorescence lifetime decay [ $\lambda_{ex} = 375$  nm and  $\lambda_{em} = 440$  nm] (b) delayed fluorescence lifetime decay [ $\lambda_{ex} = 350$  nm and  $\lambda_{em} = 440$  nm] (c) phosphorescence lifetime decay [ $\lambda_{ex} = 360$  nm and  $\lambda_{em} = 550$  nm] under vacuum [absence of oxygen] and ambient atmosphere [presence of oxygen] at 298 K for **2-OTF** in neat film [ $\lambda_{ex} = 350$  nm].

## Supplementary information

**Table S24:** Fluorescence, Delayed fluorescence and Phosphorescence lifetime for **2-OTF** in 1wt% doped film in PMMA and neat film at 298 K under vacuum.

|                  | Fluorescence (ns)      |                        |                                   |                                   | Delayed fluorescence( $\mu$ s) |                        |                                   |                                   | Phosphorescence (ms)   |                        |                                  |                                   |
|------------------|------------------------|------------------------|-----------------------------------|-----------------------------------|--------------------------------|------------------------|-----------------------------------|-----------------------------------|------------------------|------------------------|----------------------------------|-----------------------------------|
|                  | $\lambda_{ex}$<br>(nm) | $\lambda_{em}$<br>(nm) | $\tau_1$ (A <sub>1</sub> )<br>[%] | $\tau_2$ (A <sub>2</sub> )<br>[%] | $\lambda_{ex}$<br>(nm)         | $\lambda_{em}$<br>(nm) | $\tau_1$ (A <sub>1</sub> )<br>[%] | $\tau_2$ (A <sub>2</sub> )<br>[%] | $\lambda_{ex}$<br>(nm) | $\lambda_{em}$<br>(nm) | $\tau_1$<br>(A <sub>1</sub> [%]) | $\tau_2$ (A <sub>2</sub> )<br>[%] |
| <b>1wt% PMMA</b> |                        |                        |                                   |                                   |                                |                        |                                   |                                   |                        |                        |                                  |                                   |
| <b>vacuum</b>    | 375                    | 400                    | 2.86<br>(84.78)                   | 11.80<br>(13.34)                  | 380                            | 400                    | 6.11<br>(95.16)                   | 76.10<br>(4.84)                   | 380                    | 540                    | 5.01<br>(34.17)                  | 60.60<br>(65.83)                  |
| <b>Ambi</b>      | 375                    | 400                    | 2.82<br>(86.66)                   | 11.38<br>(13.34)                  |                                |                        |                                   |                                   |                        |                        |                                  |                                   |
| <b>Neat</b>      |                        |                        |                                   |                                   |                                |                        |                                   |                                   |                        |                        |                                  |                                   |
| <b>vacuum</b>    | 375                    | 430                    | 3.51<br>(67.52)                   | 30.80<br>(32.48)                  | 375                            | 430                    | 6.83<br>(85.02)                   | 96.86<br>(14.98)                  | 360                    | 550                    | 0.33<br>(49.74)                  | 2.85<br>(50.26)                   |
| <b>Ambi</b>      | 375                    | 430                    | 3.90<br>(68.49)                   | 33.15<br>(31.51)                  | 375                            | 430                    | 6.25<br>(94.27)                   | 67.53<br>(5.73)                   | 360                    | 550                    | 30.32 $\mu$ s<br>(70.40)         | 111.29<br>$\mu$ s<br>(29.60)      |

**Table S25:** List of spin-orbital coupling values for **1-OTF** and **2-OTF** between different singlet and triplet energy levels obtained theoretically using B3LYP/6-31G(d) level of theory.

| Transition                     | SOC (cm <sup>-1</sup> ) |        |
|--------------------------------|-------------------------|--------|
|                                | 1-OTF                   | 2-OTF  |
| S <sub>0</sub> →T <sub>1</sub> | 0.1691                  | 1.0000 |
| S <sub>0</sub> →T <sub>2</sub> | 0.4812                  | 6.3970 |
| S <sub>0</sub> →T <sub>3</sub> | 0.8530                  | 0.6300 |
| S <sub>1</sub> →T <sub>1</sub> | 0.1000                  | 8.2239 |
| S <sub>1</sub> →T <sub>2</sub> | 0.3952                  | 0.6211 |
| S <sub>1</sub> →T <sub>3</sub> | 0.2914                  | 0.6765 |
| S <sub>1</sub> →T <sub>4</sub> | 0.4297                  | 1.3815 |
| S <sub>1</sub> →T <sub>5</sub> | 0.3142                  | 8.6291 |

## Supplementary information

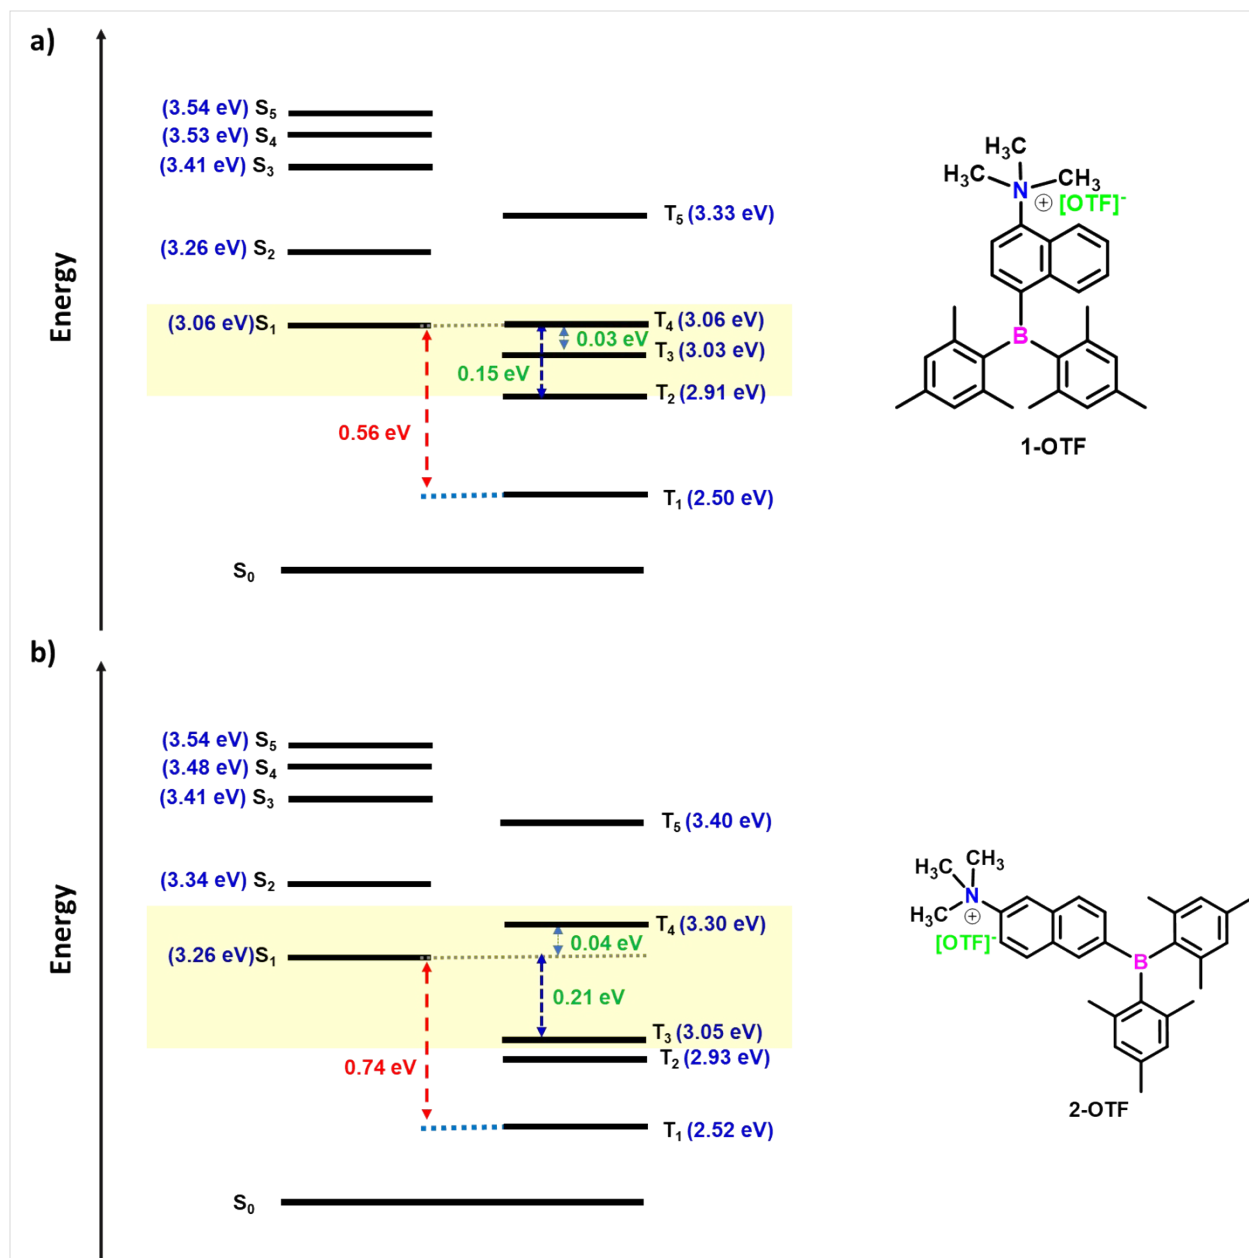

**Figure S86.** Energy level diagram showing singlet-triplet energy gap, and possible ISC channel for **1-OTF** and **2-OTF** [energy levels in the diagram are not up-to-scale, most possible T<sub>n</sub> state involved in for spin-crossover according to the energy difference are highlighted in yellow box] (Energy levels are calculated from singlet and triplet vertical transitions through TD-DFT using 6-31G (d, p)/B3LYP level of theory).



## Supplementary information

**Table S26.** Three photon absorption properties of compounds **1** and **2**

| 800 nm excitation | $\beta \times 10^{-11}$<br>(cm.W <sup>-1</sup> ) | $\gamma \times 10^{-23}$<br>(cm <sup>3</sup> /W <sup>2</sup> ) | $\sigma_{3PA} \times 10^{-78}$<br>(cm <sup>6</sup> .s <sup>2</sup> ) | Im [ $\chi^{(3)}$ ] $\times 10^{-15}$<br>(e.s.u.) | $n_2 \times 10^{-16}$<br>(cm <sup>2</sup> /W) | Re [ $\chi^{(3)}$ ] $\times 10^{14}$<br>(e.s.u.) |
|-------------------|--------------------------------------------------|----------------------------------------------------------------|----------------------------------------------------------------------|---------------------------------------------------|-----------------------------------------------|--------------------------------------------------|
| <b>1</b>          | -                                                | 3.0                                                            | 6.2                                                                  | -                                                 | 4.9                                           | 3.8                                              |
| <b>2</b>          | -                                                | 3.9                                                            | 8.1                                                                  | -                                                 | 5.6                                           | 4.4                                              |
| Reference (DCM)   | 0.07                                             | -                                                              | -                                                                    | 0.3                                               | 0.1                                           | 0.08                                             |

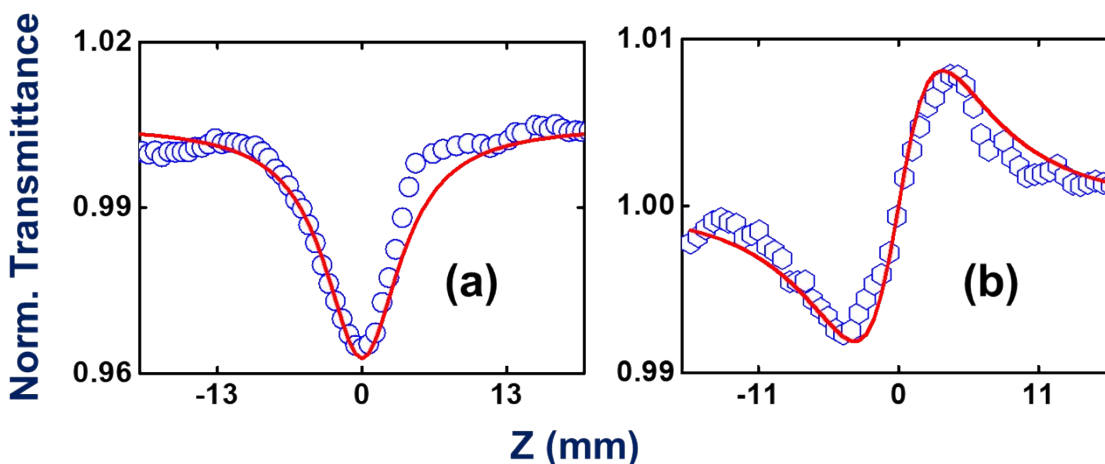

**Figure S87.** (a) Open aperture and (b) closed aperture data of the solvent DCM. Open symbols are the experimental data, while the solid lines represent the theoretical fits to the data.

### Reference

1. R. J. Errington, *Advanced practical inorganic and metal organic chemistry*, Blackie academic & professional, London, 1997.
2. W. F. Armarego and C. L. L. Chai, *Purification of laboratory chemicals*, Elsevier, UK, 2013.
3. K. Kumar, R. J. Tepper, Y. Zeng, and M. B. Zimmt, *J. Org. Chem.* **1995**, 60, 4051-4066
4. X. Liu, M. Xiang, Z. Tong, F. Luo, W. Chen, F. Liu, F. Wang, R. Q. Yu, and J. H. Jiang, *Anal. Chem.* **2018**, 90, 5534–5539
5. (a) G. M. Sheldrick, *Crystal structure refinement with SHELXL*, *Acta Crystallogr., Sect. C: Struct. Chem.*, **2015**, 71, 3-8; (b) G. M. Sheldrick, *A short history of SHELX*, *Acta Crystallogr., Sect. A: Found. Crystallogr.*, **2008**, 64, 112; (c) A. L. Spek, *Single-crystal structure validation with the program PLATON*, *J. Appl. Crystallogr.*, **2003**, 36, 7; (d) G. M. Sheldrick, *Program for Crystal Structure Solution. SHELXS-97*, University of Göttingen, Göttingen, Germany, 1997.

## Supplementary information

6. a) Frisch, M. J.; Trucks, G. W.; Schlegel, H. B.; Scuseria, G. E.; Robb, M. A.; Cheeseman, J. R.; Scalmani, G.; Barone, V.; Mennucci, B.; Petersson, G. A., et al. Gaussian 09, Revision D.01, Gaussian, Inc., Wallingford CT, **2013**. b) Lee, C.; Yang, W.; Parr, R. G. Development of the Colic-Salvetti Correlation-Energy Formula into a Functional of the Electron Density. *Phys. Rev. B* 1988, **37**, 785-789.
7. (a) K. Goushi, K. Yoshida, K. Sato, C. Adachi, *Nat Photonics* 2012, **6**, 253–258 (b) K. Masui, H. Nakanotani, C. Adachi, *Org Electron* 2013, **14**, 2721–2726. (c) T. Nakagawa, S. Y. Ku, K. T. Wong, C. Adachi, *Chem. Commun.*, 2012, **48**, 9580–9582. (d) G. Méhes, H. Nomura, Q. Zhang, T. Nakagawa, C. Adachi, *Angew. Chem. Int. Ed.*, 2012, **51**, 11311–11315. (e) N. Notsuka, H. Nakanotani, H. Noda, K. Goushi, C. Adachi, *J. Phys. Chem. Lett.*, 2020, **11**, 562–566.
